# Supplementary material for: C(sp 2 )–H cyclobutylation of hydroxyarenes enabled by silver-π-acid catalysis: diastereocontrolled synthesis of 1,3-difunctionalized cyclobutanes
Source: Royal Society of Chemistry journal article supplement (doi:10.1039/d3sc03258b), 2023-01-01
Supplement: d3sc03258b1.pdf [file d3sc03258b1.pdf]

# **C(sp<sup>2</sup>)-H Cyclobutylation of hydroxyarenes enabled by silver- $\pi$ -acid catalysis: diastereocontrolled synthesis of 1,3-difunctionalized cyclobutanes**

Lei Tang,<sup>†</sup> Qi-Nan Huang,<sup>†</sup> Feng Wu, Yuanjiu Xiao, Jin-Lan Zhou, Tong-Tong Xu,  
Wen-Biao Wu,<sup>\*</sup> Shuanglin Qu<sup>\*</sup> and Jian-Jun Feng<sup>\*</sup>

*State Key Laboratory of Chemo/Biosensing and Chemometrics, Advanced Catalytic Engineering Research Center of the Ministry of Education, College of Chemistry and Chemical Engineering, Hunan University, Changsha, Hunan 410082, P. R. China*

1334154923@qq.com;    [squ@hnu.edu.cn](mailto:squ@hnu.edu.cn)

[jianjunfeng@hnu.edu.cn](mailto:jianjunfeng@hnu.edu.cn)

## **Supporting Information**

### **Table of Contents**

|   |                                                                                         |     |
|---|-----------------------------------------------------------------------------------------|-----|
| 1 | General Information .....                                                               | S3  |
| 2 | Optimization Study .....                                                                | S4  |
| 3 | General Procedure for C(sp <sup>2</sup> )-H Cyclobutylation of Hydroxyarenes (GP) ..... | S6  |
| 4 | Procedure for the Synthesis of <b>5aa</b> .....                                         | S7  |
| 5 | Scale-Up Experiment .....                                                               | S7  |
| 6 | Synthetic Transformations .....                                                         | S8  |
| 7 | Procedure for the Control Experiments .....                                             | S11 |

|    |                                             |      |
|----|---------------------------------------------|------|
| 8  | Characterization Data of the Products ..... | S14  |
| 9  | Crystal Structure of <i>cis-3ab</i> .....   | S37  |
| 10 | NMR Spectra .....                           | S39  |
| 11 | DFT Studies .....                           | S81  |
| 12 | References.....                             | S159 |

## 1 General Information

All reactions were performed in flame-dried glassware using conventional Schlenk techniques under a static pressure of nitrogen unless otherwise stated. Liquids and solutions were transferred with syringes. Bicyclo[1.1.0]butanes (BCBs)<sup>[1]</sup> and hydroxyarenes<sup>[2]</sup> were prepared according to reported procedures. AgBF<sub>4</sub> (98%, *Jun Ding*) was purchased from commercial suppliers and used as received. Other commercially available reagents were purchased from *Sigma-Adrich*, *Leyan*, *Energy Chemical* and *Bide Chemical Company*. Chlorobenzene (PhCl) were purchased from *Energy Chemical* (99%, Extra Dry) and used as received. All other solvents (1,2-dichloroethane, toluene, and CH<sub>2</sub>Cl<sub>2</sub> etc.) were dried and purified following standard procedures. Technical grade solvents for extraction or chromatography (Petroleum ether, CH<sub>2</sub>Cl<sub>2</sub>, and ethyl acetate) were distilled prior to use. Analytical thin layer chromatography (TLC) was performed on silica gel 60 F254 glass plates by *Merck*. Flash column chromatography was performed on silica gel 60 (40–63 μm, 230–400 mesh, ASTM) by *Grace* using the indicated solvents. <sup>1</sup>H, <sup>13</sup>C NMR spectra were recorded in CDCl<sub>3</sub> on Bruker AV400 instruments. Chemical shifts are reported in parts per million (ppm) and are referenced to the residual solvent resonance as the internal standard (CDCl<sub>3</sub>: δ = 7.26 ppm for <sup>1</sup>H NMR and CDCl<sub>3</sub>: δ = 77.0 ppm for <sup>13</sup>C NMR; acetone-*d*<sub>6</sub>: δ = 2.05 ppm for <sup>1</sup>H NMR and acetone-*d*<sub>6</sub>: δ = 29.8 ppm for <sup>13</sup>C NMR; MeOH-*d*<sub>4</sub>: δ = 3.31 ppm for <sup>1</sup>H NMR and MeOH-*d*<sub>4</sub>: δ = 49.0 ppm for <sup>13</sup>C NMR). Data are reported as follows: chemical shift, multiplicity (s = singlet, d = doublet, t = triplet, q = quartet, m = multiplet), coupling constants (Hz), and integration. The full-scan mass spectra were taken on a hybrid quadrupole-orbitrap mass spectrometer equipped with a heated electrospray ionization source (ThermoFischer Scientific, Bremen, Germany). X-ray data were taken on a Bruker SMART APEX II X-Ray diffractometer equipped with a large area CCD detector.

## 2 Optimization Study

**Table S1. Screening of catalysts for the C(sp<sup>2</sup>)-H cyclobutylation<sup>[a]</sup>**

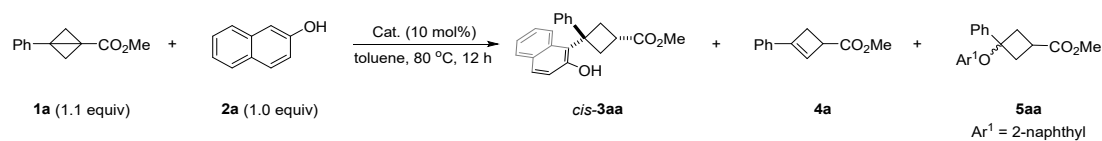

| entry             | Catalyst                                              | <i>cis-3aa</i> Yield [%] <sup>[b]</sup><br>(d.r. = <i>cis/trans</i> ) | Yield of <b>4a</b> [%] <sup>[b]</sup> | Yield of <b>5a</b> [%] <sup>[b]</sup> |
|-------------------|-------------------------------------------------------|-----------------------------------------------------------------------|---------------------------------------|---------------------------------------|
| 1                 | Bi(OTf) <sub>3</sub>                                  | <5 (-) <sup>[c]</sup>                                                 | 0                                     | 0                                     |
| 2                 | Ga(OTf) <sub>3</sub>                                  | 37 (77:23) <sup>[c][d]</sup>                                          | 0                                     | 0                                     |
| 3                 | Cu(OTf) <sub>2</sub>                                  | 0                                                                     | 0                                     | 0                                     |
| 4                 | Sc(OTf) <sub>3</sub>                                  | 0                                                                     | 0                                     | 0                                     |
| 5                 | Zn(OTf) <sub>2</sub>                                  | 9 (62:38) <sup>[c][d]</sup>                                           | 31                                    | 63                                    |
| 6                 | FeCl <sub>3</sub>                                     | 35 (84:16) <sup>[c][d]</sup>                                          | 8                                     | 0                                     |
| 7                 | AlCl <sub>3</sub>                                     | 49 (82:18)                                                            | 15                                    | 0                                     |
| 8 <sup>[e]</sup>  | AlCl <sub>3</sub>                                     | 34 (45:55)                                                            | 17                                    | 0                                     |
| 9                 | Ni(ClO <sub>4</sub> ) <sub>2</sub> ·6H <sub>2</sub> O | 69 (90:10)                                                            | .. <sup>[c]</sup>                     | .. <sup>[c]</sup>                     |
| 10                | AgClO <sub>4</sub>                                    | 69 (85:15)                                                            | 23                                    | 0                                     |
| 11                | AgNO <sub>3</sub>                                     | 0                                                                     | 58                                    | 19                                    |
| 12                | Ag <sub>2</sub> CO <sub>3</sub>                       | 0                                                                     | 0                                     | 0                                     |
| 13                | AgOTf                                                 | 61 (83:17)                                                            | 18                                    | 0                                     |
| 14                | AgSbF <sub>6</sub>                                    | 35 (74:26)                                                            | 5                                     | 0                                     |
| 15                | AgPF <sub>6</sub>                                     | 21 (43:57)                                                            | 39                                    | 10                                    |
| 16                | AgNTf <sub>2</sub>                                    | 55 (90:10)                                                            | 31                                    | 0                                     |
| <b>17</b>         | <b>AgBF<sub>4</sub></b>                               | <b>84 (89:11)</b>                                                     | <b>16</b>                             | <b>0</b>                              |
| 18 <sup>[f]</sup> | AgBF <sub>4</sub>                                     | 79 (90:10)                                                            | 11                                    | 0                                     |
| 19                | BF <sub>3</sub> ·Et <sub>2</sub> O                    | 72 (85:15)                                                            | .. <sup>[c]</sup>                     | 0                                     |
| 20                | B(C <sub>6</sub> F <sub>5</sub> ) <sub>3</sub>        | 24 (52:48)                                                            | 54                                    | 0                                     |
| 21                | TsOH·H <sub>2</sub> O                                 | 75 (77:23)                                                            | 8                                     | 0                                     |
| 22 <sup>[e]</sup> | TsOH·H <sub>2</sub> O                                 | 40 (45:55)                                                            | 6                                     | 0                                     |
| 23                | CF <sub>3</sub> COOH                                  | 0                                                                     | 62                                    | 17                                    |
| 24                | CF <sub>3</sub> SO <sub>3</sub> H                     | 0                                                                     | 0                                     | 0                                     |

[a] Reaction conditions: **1a** (0.22 mmol, 1.1 equiv), **2a** (0.20 mmol, 1.0 equiv) and catalyst (10.0 mol%), toluene (2 mL), 80 °C, under N<sub>2</sub> for 12 h. [b] NMR yield with CH<sub>2</sub>Br<sub>2</sub> as an internal standard. The d.r. value was determined by <sup>1</sup>HNMR spectroscopic analysis of the crude reaction mixture. [c] The reaction afforded a complex reaction mixture and some unknown side products have the same chemical shift as the aimed product. So the d.r. value (or NMR yield) cannot be determined by <sup>1</sup>HNMR spectroscopic analysis of the crude reaction mixture. [d] The d.r. value was determined by <sup>1</sup>HNMR spectroscopic analysis of the crude reaction product after short column chromatography. [e] Run at 25 °C. [f] **1a** (0.2 mmol, 1.0 equiv) and **2a** (0.30 mmol, 1.5 equiv) were used.

**Table S2. Screening of temperature for the C(sp<sup>2</sup>)-H cyclobutylation<sup>[a]</sup>**

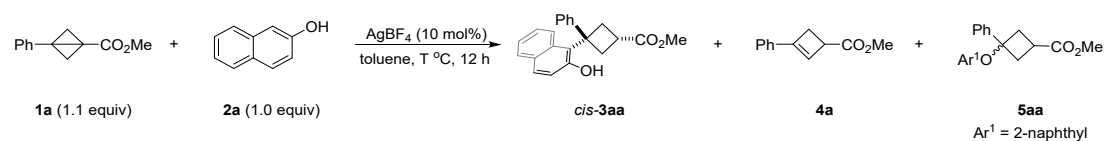

| entry    | T °C       | <i>cis</i> - <b>3aa</b> Yield [%] <sup>[b]</sup><br>(d.r. = <i>cis/trans</i> ) | Yield of <b>4a</b> [%] <sup>[b]</sup> | Yield of <b>5a</b> [%] <sup>[b]</sup> |
|----------|------------|--------------------------------------------------------------------------------|---------------------------------------|---------------------------------------|
| 1        | 25         | 23 (50:50)                                                                     | 9                                     | 53                                    |
| 2        | 40         | 36 (62:38)                                                                     | 11                                    | 35                                    |
| 3        | 60         | 76 (85:15)                                                                     | 18                                    | 0                                     |
| 4        | 80         | 84 (89:11)                                                                     | 16                                    | 0                                     |
| <b>5</b> | <b>100</b> | <b>78 (91:9)</b>                                                               | <b>17</b>                             | <b>0</b>                              |

[a] Reaction conditions: **1a** (0.22 mmol, 1.1 equiv), **2a** (0.20 mmol, 1.0 equiv) and AgBF<sub>4</sub> (10.0 mol%), toluene (2 mL), at T °C under N<sub>2</sub> for 12 h. [b] NMR yield with CH<sub>2</sub>Br<sub>2</sub> as an internal standard.

**Table S3. Screening of solvent for the C(sp<sup>2</sup>)-H cyclobutylation<sup>[a]</sup>**

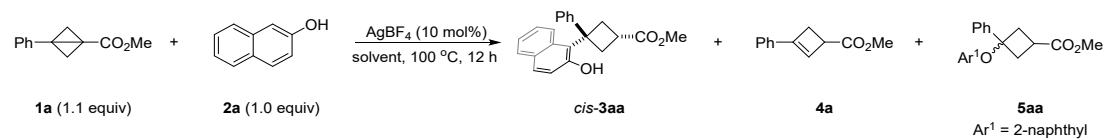

| entry | solvent           | <i>cis</i> - <b>3aa</b> Yield [%] <sup>[b]</sup><br>(d.r. = <i>cis/trans</i> ) | Yield of <b>4a</b> [%] <sup>[b]</sup> | Yield of <b>5a</b> [%] <sup>[b]</sup> |
|-------|-------------------|--------------------------------------------------------------------------------|---------------------------------------|---------------------------------------|
| 1     | Toluene           | 78 (91:9)                                                                      | 17                                    | 0                                     |
| 2     | Chlorobenzene     | 46 (90:10)                                                                     | 12                                    | 0                                     |
| 3     | Anisole           | 33 (87:13)                                                                     | 8                                     | 0                                     |
| 4     | MeNO <sub>2</sub> | 0                                                                              | 0                                     | 0                                     |
| 5     | HFIP              | 36 (55:45)                                                                     | 21                                    | 4                                     |
| 6     | EtOAc             | 43 (60:40)                                                                     | 11                                    | 0                                     |

|                         |                              |                  |           |          |
|-------------------------|------------------------------|------------------|-----------|----------|
| 7                       | DCE                          | 51 (94.5:5.5)    | 9         | 0        |
| 8                       | CHCl <sub>3</sub>            | 68 (92:8)        | 8         | 0        |
| 9                       | CCl <sub>4</sub>             | 40 (58:42)       | 23        | 7        |
| 10                      | MeCN                         | 25 (48:52)       | 15        | 20       |
| 11                      | THF                          | 22 (40:60)       | 12        | 27       |
| 12                      | <i>n</i> -Hexane             | 36 (57:43)       | 24        | 15       |
| 13                      | Toluene/DCE(1:1, v/v)        | 73 (94:6)        | 14        | 0        |
| <b>14<sup>[c]</sup></b> | <b>Toluene/DCE(1:1, v/v)</b> | <b>85 (95:5)</b> | <b>11</b> | <b>0</b> |
| 15                      | Toluene/DCE(1:4, v/v)        | 63 (94:6)        | 16        | 0        |
| 16                      | Toluene/DCE(4:1, v/v)        | 69 (92:8)        | 16        | 0        |
| 17                      | Toluene/DCE(10:1, v/v)       | 61 (90:10)       | 16        | 0        |

[a] Reaction conditions: **1a** (0.22 mmol, 1.1 equiv), **2a** (0.20 mmol, 1.0 equiv), AgBF<sub>4</sub> (10.0 mol%), toluene (2 mL), 100 °C, under N<sub>2</sub> for 12 h. HFIP = 1,1,1,3,3,3-Hexafluoro-2-propanol; DCE = 1,2-dichloroethane; [b] NMR yield with CH<sub>2</sub>Br<sub>2</sub> as an internal standard. [c] **1a** (0.36 mmol, 1.2 equiv), **2a** (0.3 mmol, 1.0 equiv) and AgBF<sub>4</sub> (2.5 mol%) in toluene/1,2-dichloroethane(DCE) (1:1, v/v, 2 mL) at 100 °C for 3 h under N<sub>2</sub>.

### 3 General Procedure for C(sp<sup>2</sup>)-H Cyclobutylation of Hydroxyarenes (GP)

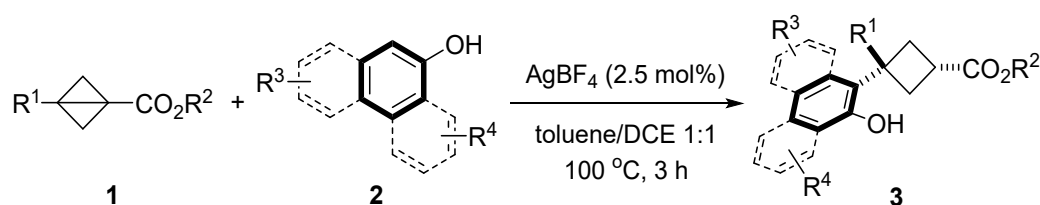

To a flame-dried Schlenk tube is added BCB **1** (0.36 mmol, 1.2 equiv), hydroxyarene **2** (0.3 mmol, 1.0 equiv), and AgBF<sub>4</sub> (1.5 mg, 7.5 μmol, 2.5 mol%). The tube is evacuated and backfilled with N<sub>2</sub> (3 times) followed by the addition of toluene/DCE (2.0 mL, 1/1, v/v). The reaction mixture is stirred at 100 °C for 3 h. Upon complete consumption of **2**, the solvent is removed under reduced pressure, and the residue is purified by chromatography on a short silica gel column to afford the desired 1,3-difunctionalized cyclobutane **3**.

#### 4 Procedure for the Synthesis of 5aa

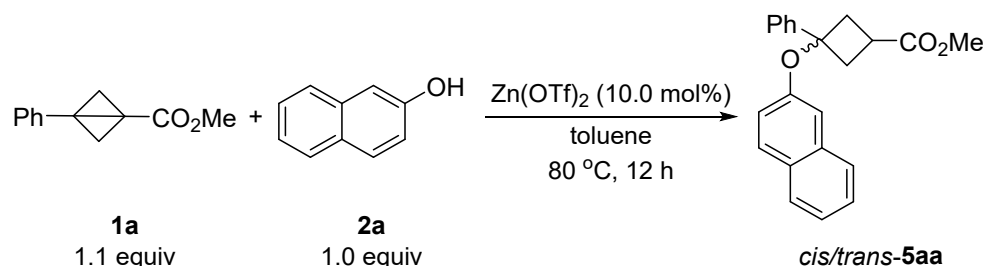

To a flame-dried Schlenk tube is added methyl 3-phenylbicyclo[1.1.0]butane-1-carboxylate **1a** (41.4 mg, 0.22 mmol, 1.1 equiv), naphthalen-2-ol **2a** (28.8 mg, 0.2 mmol, 1.0 equiv) and  $\text{Zn(OTf)}_2$  (7.3 mg, 20.0  $\mu\text{mol}$ , 10.0 mol%). The tube is evacuated and backfilled with  $\text{N}_2$  (3 times) followed by the addition of toluene (2.0 mL). The reaction mixture is stirred at 80 °C for 12 h. Upon complete consumption of **2a**, the solvent is removed under reduced pressure, and the residue is purified by flash chromatography on silica gel using petroleum ether/EtOAc (50/1) to afford the desired **5aa** as a white solid (63% NMR yield, d.r. = 1:1): major isomer (21.3 mg, 32% yield), minor isomer (20.6 mg, 31% yield).

#### 5 Scale-Up Experiment

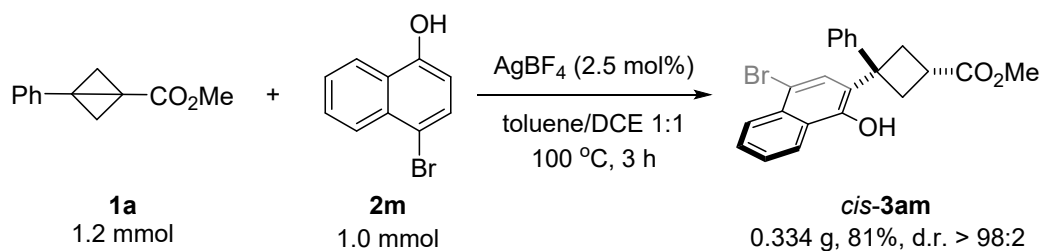

To a flame-dried Schlenk tube is added methyl 3-phenylbicyclo[1.1.0]butane-1-carboxylate **1a** (225.9 mg, 1.2 mmol, 1.2 equiv), 4-bromonaphthalen-1-ol **2m** (223.1 mg, 1.0 mmol, 1.0 equiv) and  $\text{AgBF}_4$  (4.9 mg, 0.025 mmol, 2.5 mol%). The tube is evacuated and backfilled with  $\text{N}_2$  (3 times) followed by the addition of toluene/DCE (6.6 mL, 1/1, v/v). The reaction mixture is stirred at 100 °C for 3 h. Upon complete consumption of **2m**, the solvent is removed under reduced pressure, and the residue is purified by flash chromatography on silica gel using petroleum ether/EtOAc (20/1 to

5/1) to afford the desired 1,3-difunctionalized cyclobutane *cis*-**3am** as a white solid (0.334 g, 81% yield, d.r. > 98:2).

## 6 Synthetic Transformations

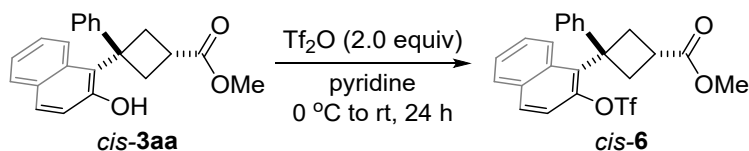

**Synthesis of (6)**<sup>[3]</sup>: The *cis*-**3aa** (332 mg, 1 mmol, 1.0 equiv) is dissolved in freshly distilled pyridine (5 mL). The reaction mixture is cooled at 0 °C and trifluoromethanesulfonic anhydride (564 mg, 2.0 mmol, 2.0 equiv) is added dropwise. The resulting solution is then stirred at room temperature for 24 h. After addition of water (4 mL), the reaction mixture is extracted with Et<sub>2</sub>O (3 × 10 mL). The combined organic layer is washed successively with water (2 × 15 mL), 10% aqueous HCl solution (2 × 15 mL), brine (2 × 15 mL), dried over MgSO<sub>4</sub>, filtered, concentrated in vacuum and purified by chromatography on silica gel (petroleum ether/EtOAc = 10/1) to give the product *cis*-**6** (410 mg, 88%) as a white solid.

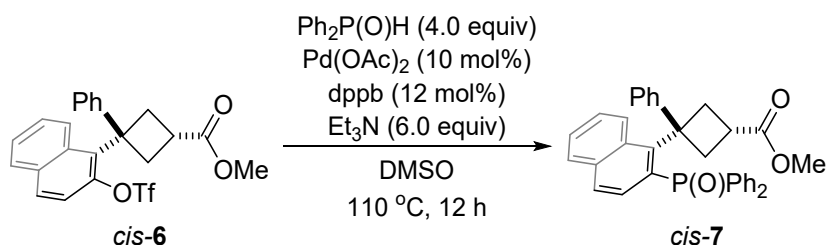

**Synthesis of (7)**<sup>[3]</sup>: Compound *cis*-**6** (46.4 mg, 0.1 mmol, 1.0 equiv) is dissolved in DMSO (3 mL, pre-deoxygenized by ultrasonic). Then Ph<sub>2</sub>P(O)H (80.9 mg, 0.4 mmol, 4.0 equiv), Pd(OAc)<sub>2</sub> (2.2 mg, 10 μmol, 10 mol%), and dppb (5.1 mg, 12 μmol, 12 mol%) are added to the solution. NEt<sub>3</sub> (60.7 mg, 0.6 mmol, 6.0 equiv) is added and the reaction mixture is heated to 110 °C for 12 h. After completion of the reaction, dichloromethane is added and the reaction quenched by hydrochloric acid (1 M). The resulting mixture is extracted with dichloromethane and the organic layer successively washed by saturated NaHCO<sub>3</sub> aqueous solution and saturated NaCl aqueous solution, and finally dried with anhydrous Na<sub>2</sub>SO<sub>4</sub>. Solvents are removed in *vacuo* and purified



by flash column chromatography (petroleum ether/EtOAc = 2/1) to afford compound *cis-7* (38.5 mg, 74%) as a white solid.

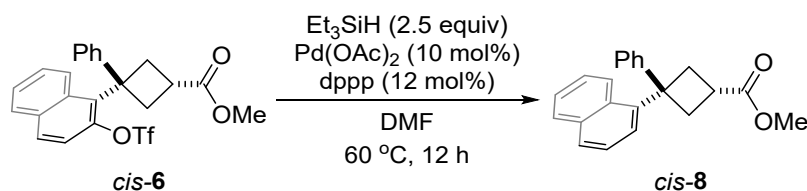

**Synthesis of (8)**<sup>[3]</sup>: To a mixture of *cis-6* (46.4 mg, 0.1 mmol, 1.0 equiv), Pd(OAc)<sub>2</sub> (2.2 mg, 10 μmol, 10 mol%) and dppp (4.9 mg, 12 μmol, 12 mol%) in 2 mL of DMF at 60 °C, Et<sub>3</sub>SiH (29.1 mg, 0.25 mmol, 2.5 equiv) is added *via* syringe. After 12 h, the mixture is diluted with Et<sub>2</sub>O successively washed with water, sat. aq. NaHCO<sub>3</sub> and sat. aq. NaCl, dried over Na<sub>2</sub>SO<sub>4</sub>, concentrated in vacuum and purified by chromatography (petroleum ether/EtOAc = 10/1) on silica gel to give the product *cis-8* (31.2 mg, 99%) as a white solid.

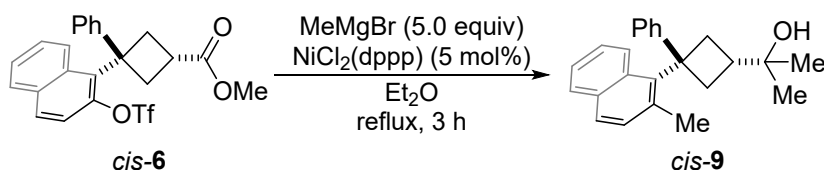

**Synthesis of (9)**<sup>[3]</sup>: To a mixture of *cis-6* (56.2 mg, 0.1 mmol, 1.0 equiv), NiCl<sub>2</sub>(dppp) (2.7 mg, 5 μmol, 5 mol%) in 1 mL of Et<sub>2</sub>O at 0 °C, methyl magnesiumbromide (0.167 mL, 3.0 M in Et<sub>2</sub>O, 0.5 mmol, 5.0 equiv) was added *via* syringe. The reaction mixture is heated to reflux for 3 h. At this point the reaction is quenched by addition of MeOH (0.2 mL) slowly at 0 °C. Solvents are removed in *vacuo* and purified by flash column chromatography (petroleum ether/EtOAc = 10/1) to afford compound *cis-9* (30.1 mg, 91%) as a white solid.

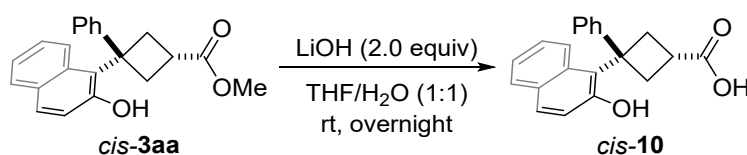

**Synthesis of (10)**<sup>[1a]</sup>: A Schlenk tube is charged with *cis-3aa* (166.2 mg, 0.5 mmol, 1.0 equiv) and LiOH (24.0 mg, 1.0 mmol, 2 equiv). The solids are dissolved in a 1:1 v/v

THF/H<sub>2</sub>O mixture (5.0 mL). The reaction mixture is stirred at room temperature overnight. The mixture is then concentrated under reduced pressure. The resulting residue is dissolved in water (5.0 mL) and acidified with 1 M HCl to adjust the pH to 4-6. Once the solution reached the desired pH range, the aqueous phase is extracted with CH<sub>2</sub>Cl<sub>2</sub> (5 mL). The organic layer is dried using anhydrous MgSO<sub>4</sub>, followed by filtration and evaporation of the solvent to give compound *cis*-**10** (150.0 mg, 94%) as a white solid.

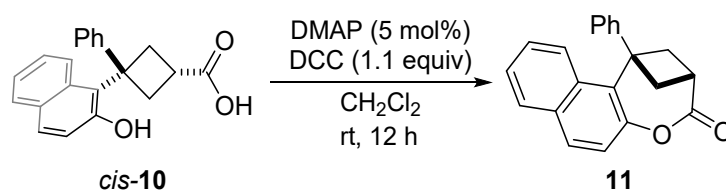

**Synthesis of (11)** <sup>[4]</sup>: Acid *cis*-**10** (0.15 mmol, 47.8 mg, 1.0 equiv) is dissolved in CH<sub>2</sub>Cl<sub>2</sub> (6 mL) and a solution of DMAP (0.92 mg, 7.5  $\mu$ mol, 5 mol%) and DCC (34.0 mg, 0.165 mmol, 1.1 equiv) in CH<sub>2</sub>Cl<sub>2</sub> (3 mL) is added. The reaction is stirred at room temperature for 12 hours before being quenched with water. The mixture is separated and the aqueous layer is extracted with CH<sub>2</sub>Cl<sub>2</sub>. The combined organic extracts are washed with brine and dried (MgSO<sub>4</sub>) followed by filtration and evaporation of the solvent. The residue is purified by flash column chromatography (petroleum ether/EtOAc = 20/1) to afford **11** as a white solid. (28.9 mg, 64% yield).

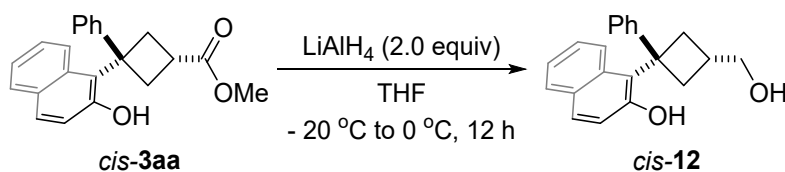

**Synthesis of (12)** <sup>[5]</sup>: To a suspension of LiAlH<sub>4</sub> (30 mg, 0.8 mmol, 2.0 equiv) in anhydrous THF (20 mL), a solution of *cis*-**3aa** (132.7 mg, 0.4 mmol, 1.0 equiv) in anhydrous THF (5 mL) is added dropwise at -20 °C. Then the reaction mixture is stirred at 0 °C for 12 h. The reaction is quenched with ice water and saturated aqueous sodium potassium tartrate is added, and the solution is stirred for another 30 min, then the aqueous layer is extracted with EtOAc for three times, the combined organic layers are

dried and concentrated under reduced pressure. The crude product is purified by silica gel column chromatography (petroleum ether/EtOAc = 2:1) to afford the corresponding product *cis*-**12** (115.0 mg, 94% yield) as a white solid.

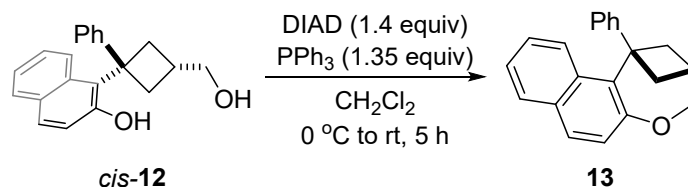

**Synthesis of (13)** <sup>[5]</sup>: To a solution of *cis*-**12** (57.5 mg, 0.19 mmol, 1.0 equiv) and PPh<sub>3</sub> (67.1 mg, 0.256 mmol, 1.35 equiv) in anhydrous CH<sub>2</sub>Cl<sub>2</sub> (8.0 mL) at 0 °C is added diisopropyl azodicarboxylate (69.8 mg, 0.266 mmol, 1.4 equiv) slowly under N<sub>2</sub> atmosphere. The reaction is stirred at 0 °C for 30 min, then at room temperature for another 5 h. After evaporation, the residue is purified by column chromatography on silica gel (petroleum ether/EtOAc = 100:1) to afford the desired product **13** (21.1 mg, 39% yield) as a white solid.

## 7 Procedure for the Control Experiments

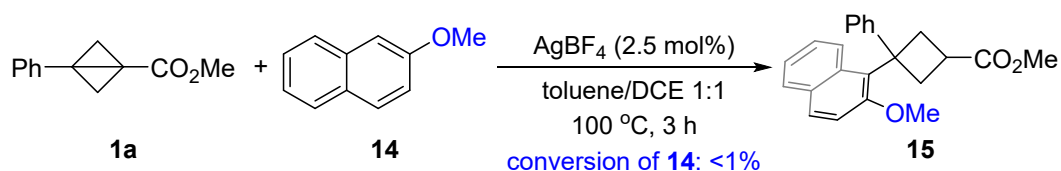

To a flame-dried Schlenk tube is added **1a** (67.8 mg, 0.36 mmol, 1.2 equiv), 2-methoxynaphthalene (47.5 mg, 0.3 mmol, 1.0 equiv) and AgBF<sub>4</sub> (1.5 mg, 7.5 μmol, 2.5 mol%). The tube is evacuated and backfilled with N<sub>2</sub> (3 times) followed by the addition of toluene/DCE (2.0 mL, 1/1, v/v). The reaction mixture is stirred at 100 °C for 3 h. Then the solvent is removed under reduced pressure, and the residue is dissolved in CDCl<sub>3</sub> (0.5 mL). The conversion of **14** (< 1%) is determined by <sup>1</sup>H NMR analysis with CH<sub>2</sub>Br<sub>2</sub> as the internal standard. (*The desired reaction did not occur when 2-methoxynaphthalene was employed.*)

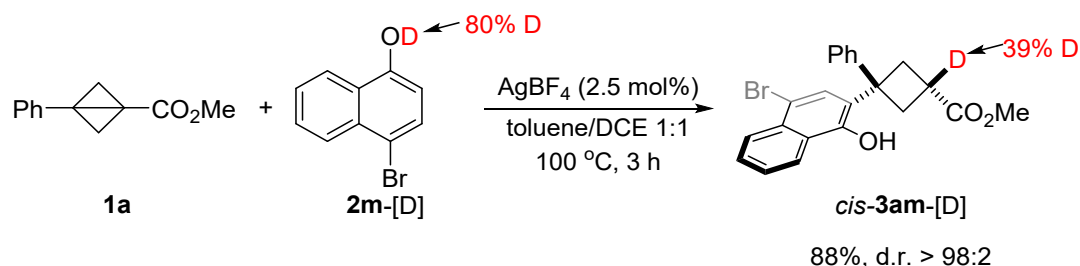

In a glove box, to a flame-dried Schlenk tube is charged with **1a** (67.8 mg, 0.36 mmol, 1.2 equiv), deuterated 4-bromonaphthalen-1-ol **2m**-[D] (67.2 mg, 0.30 mmol, 1.0 equiv),<sup>[6]</sup> and  $\text{AgBF}_4$  (1.5 mg, 7.5  $\mu\text{mol}$ , 2.5 mol %). The tube is removed from the glove box and evacuated and backfilled with  $\text{N}_2$  (3 times) followed by the addition of toluene/DCE (2.0 mL, 1/1, v/v). The reaction mixture is stirred at 100 °C for 3 h. Evaporation of the solvent under reduced pressure afforded the crude title compound. The yield of product *cis*-**3am**-[D] is determined by  $^1\text{H}$  NMR analysis with  $\text{CH}_2\text{Br}_2$  as the internal standard.

When deuterated 4-bromonaphthalen-1-ol **2m**-[D] was used under standard conditions, the reaction gave *cis*-**3am**-[D] in 88% NMR yield with 39% deuterium incorporation. The above deuterium labeling experiment confirmed the critical role of hydroxyl group of phenols in the current transformation.

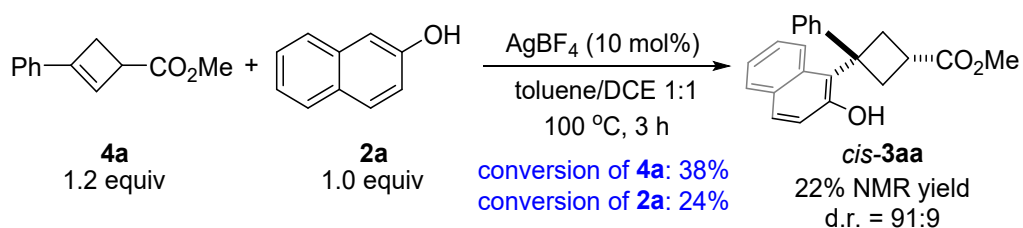

To a flame-dried Schlenk tube is added methyl 3-phenylcyclobut-2-ene-1-carboxylate **4a** (17.8 mg, 0.095 mmol, 1.2 equiv), naphthalen-2-ol **2a** (11.4 mg, 0.079 mmol, 1.0 equiv), and  $\text{AgBF}_4$  (1.5 mg, 7.9  $\mu\text{mol}$ , 10 mol%). The tube is evacuated and backfilled with  $\text{N}_2$  (3 times) followed by the addition of toluene/DCE (1.5 mL, 1/1, v/v). The reaction mixture is stirred at 100 °C for 3 h. Then the solvent is removed under reduced pressure, and the residue is dissolved in  $\text{CDCl}_3$  (0.5 mL). The conversion of **4a** (38%) and **2a** (24%) and the NMR yield of *cis*-**3aa** (22%) are determined by  $^1\text{H}$  NMR analysis

with  $\text{CH}_2\text{Br}_2$  as the internal standard. (Treatment of **4a** with standard conditions gave **3aa** in 22% NMR yield. However, cyclobutene **4a** was far less reactive than bicyclobutane **1a**).

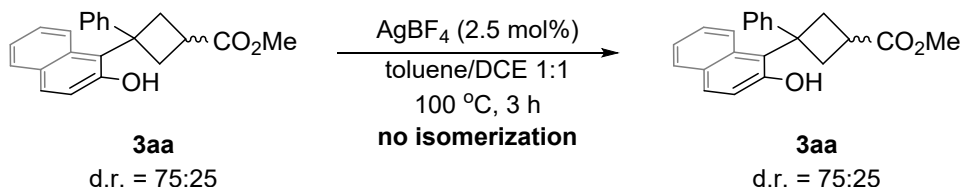

To a flame-dried Schlenk tube is added methyl 3-(2-hydroxynaphthalen-1-yl)-3-phenylcyclobutane-1-carboxylate **3aa** (66.5 mg, 0.2 mmol, d.r = 75:25) and  $\text{AgBF}_4$  (1.0 mg, 5  $\mu\text{mol}$ , 2.5 mol%). The tube is evacuated and backfilled with  $\text{N}_2$  (3 times) followed by the addition of toluene/DCE (1.67 mL, 1/1, v/v). The reaction mixture is stirred at 100  $^\circ\text{C}$  for 3 h. Then the solvent is removed under reduced pressure, and the residue is dissolved in  $\text{CDCl}_3$  (0.5 mL). The diastereoisomer ratio of **3aa** is determined by  $^1\text{H}$  NMR analysis with  $\text{CH}_2\text{Br}_2$  as the internal standard. (When **3aa** with 75:25 d.r. was applied under the standard conditions, no change in diastereoselectivity of **3aa** was found. This result suggests that high diastereoselectivity might not be able to obtain via an isomerization pathway (trans- to cis-**3aa**). However, high diastereoselectivity can be obtain via a keto-enol tautomerism in the presence of  $\text{TsOH}$ ).

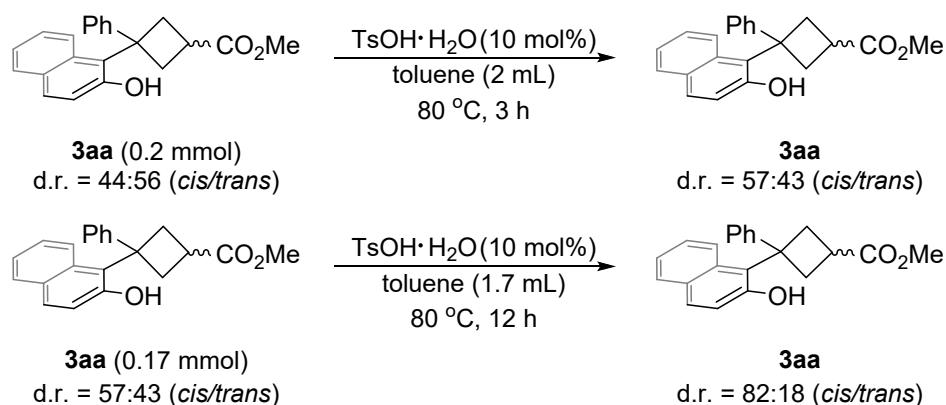

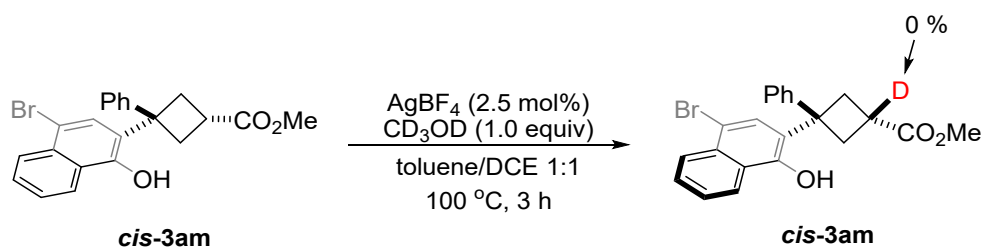

To a flame-dried Schlenk tube is added methyl 3-(4-bromo-1-hydroxynaphthalen-2-yl)-3-phenylcyclobutane-1-carboxylate **3am** (123.4 mg, 0.3 mmol, *d.r* > 98:2) and AgBF<sub>4</sub> (1.5 mg, 7.5 μmol, 2.5 mol%). The tube is evacuated and backfilled with N<sub>2</sub> (3 times), Then CD<sub>3</sub>OD (10.8 mg, 0.3 mmol, 1.0 equiv) is add to the Schlenk tube followed by the addition of toluene/DCE (2 mL, 1/1, v/v). The reaction mixture is stirred at 100 °C for 3 h. Then the solvent is removed under reduced pressure, and the residue is dissolved in CDCl<sub>3</sub> (0.5 mL). The conversion of *cis*-**3am** is determined by <sup>1</sup>H NMR analysis. (*When cis-3am with >98:2 d.r. was applied under the standard conditions in the presence of CD<sub>3</sub>OD, no change in diastereoselectivity of 3am was found and no deuterium-labeled 3am was observed. This result again suggests that high diastereoselectivity might not be able to obtain via an isomerization.*)

## 8 Characterization Data of the Products

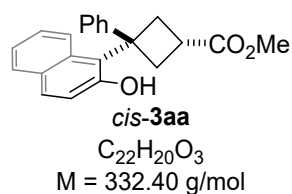

**(*cis*)-Methyl-3-(2-hydroxynaphthalen-1-yl)-3-phenylcyclobutane-1-carboxylate** (*cis*-**3aa**): Prepared from naphthalen-2-ol (**2a**, 43.3 mg, 0.3 mmol) and methyl 3-phenylbicyclo[1.1.0]butane-1-carboxylate (**1a**, 67.8 mg, 0.36 mmol) according to the **GP** at 100 °C for 3 h. Purification by flash chromatography on silica gel using petroleum ether/EtOAc (20/1 to 5/1) afforded *cis*-**3aa** as a white solid (79.4 mg, 80% yield, *d.r.* = 95:5).

*cis*-**3aa**: *R<sub>f</sub>* = 0.40 (petroleum ether/EtOAc = 5/1). <sup>1</sup>H NMR (400 MHz, CDCl<sub>3</sub>): δ 7.72 (d, *J* = 8.0 Hz, 1H), 7.66-7.63 (m, 3H), 7.57-7.53 (m, 1H), 7.36-7.25 (m, 4H), 7.20-7.17

(m, 1H), 6.97 (dd,  $J = 8.8$  and  $1.6$  Hz, 1H), 5.41-5.30 (m, 1H), 3.65 (s, 3H), 3.43-3.26 (m, 5H) ppm.  $^{13}\text{C NMR}$  (100 MHz,  $\text{CDCl}_3$ ):  $\delta$  176.6, 150.6, 146.5, 132.1, 129.6, 128.7, 128.6, 128.5, 126.4, 126.3, 126.2, 125.7, 124.4, 122.6, 118.7, 51.9, 46.0, 40.5, 34.3 ppm. **HRMS** (ESI)  $m/z$ :  $[\text{M}-\text{H}]^-$  calcd. for  $\text{C}_{22}\text{H}_{19}\text{O}_3$ : 331.1334; found: 331.1312.

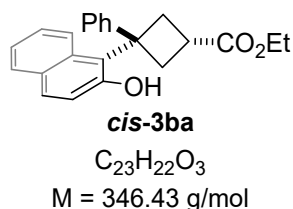

**(*cis*)-Ethyl-3-(2-hydroxynaphthalen-1-yl)-3-phenylcyclobutane-1-carboxylate (*cis*-3ba):** Prepared from naphthalen-2-ol (**2a**, 43.3 mg, 0.3 mmol) and ethyl 3-phenylbicyclo[1.1.0]butane-1-carboxylate (**1b**, 72.8 mg, 0.36 mmol) according to the **GP** at 100 °C for 3 h. Purification by flash chromatography on silica gel using petroleum ether/EtOAc (20/1 to 5/1) afforded *cis*-**3ba** as a white solid (82.8 mg, 80% yield, d.r. = 93:7)

*cis*-**3ba**:  $R_f = 0.40$  (petroleum ether/EtOAc = 5/1).  $^1\text{H NMR}$  (400 MHz,  $\text{CDCl}_3$ ) 7.70-7.64 (m, 4H), 7.45-7.42 (m, 1H), 7.35-7.23 (m, 4H), 7.18-7.15 (m, 1H), 6.93 (d,  $J = 8.8$  Hz, 1H), 6.05 (broad s, 1H), 4.13 (q,  $J = 7.2$  Hz, 2H), 3.42-3.25 (m, 5H), 1.23 (t,  $J = 7.2$  Hz, 3H) ppm.  $^{13}\text{C NMR}$  (100 MHz,  $\text{CDCl}_3$ ):  $\delta$  176.0, 150.6, 146.5, 132.1, 129.7, 128.7, 128.6, 128.5, 126.3, 126.2, 125.7, 124.4, 122.6, 118.7, 60.8, 46.0, 40.5, 34.5, 14.2 ppm. **HRMS** (ESI)  $m/z$ :  $[\text{M}-\text{H}]^-$  calcd. for  $\text{C}_{23}\text{H}_{21}\text{O}_3$ : 345.1491; found: 345.1456.

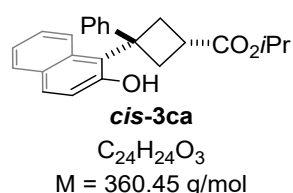

**(*cis*)-Isopropyl-3-(2-hydroxynaphthalen-1-yl)-3-phenylcyclobutane-1-carboxylate (*cis*-3ca):** Prepared from naphthalen-2-ol (**2a**, 43.3 mg, 0.3 mmol) and isopropyl 3-phenylbicyclo[1.1.0]butane-1-carboxylate (**1c**, 77.9 mg, 0.36 mmol) according to the **GP** at 100 °C for 3 h. Purification by flash chromatography on silica gel using petroleum

ether/EtOAc (20/1 to 5/1) afforded *cis*-**3ca** as a white solid (82.2 mg, 76% yield, d.r. = 90:10)

*cis*-**3ca**:  $R_f$  = 0.40 (petroleum ether/EtOAc = 5/1). **<sup>1</sup>H NMR** (400 MHz, CDCl<sub>3</sub>): δ 7.67-7.65 (m, 4H), 7.37-7.21 (m, 5H), 7.17-7.13 (m, 1H), 6.91 (d,  $J$  = 8.8 Hz, 1H), 6.52-6.50 (m, 1H), 5.05-4.99 (m, 1H), 3.34-3.23 (m, 5H), 1.21 (d,  $J$  = 6.4 Hz, 6H) ppm. **<sup>13</sup>C NMR** (100 MHz, CDCl<sub>3</sub>): δ 176.0, 150.8, 146.6, 132.2, 129.6, 128.7, 128.5, 128.4, 126.4, 126.3, 126.1, 125.6, 124.4, 122.5, 118.7, 68.2, 46.0, 40.4, 34.8, 21.8 ppm. **HRMS** (ESI)  $m/z$ : [M-H]<sup>-</sup> calcd. for C<sub>24</sub>H<sub>23</sub>O<sub>3</sub>: 359.1647; found: 359.1620.

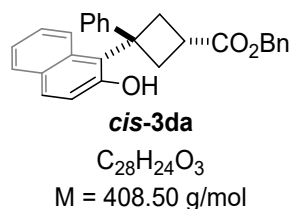

**(*cis*)-Benzyl-3-(2-hydroxynaphthalen-1-yl)-3-phenylcyclobutane-1-carboxylate** (*cis*-**3da**): Prepared from naphthalen-2-ol (**2a**, 43.3 mg, 0.3 mmol) and benzyl 3-phenylbicyclo[1.1.0]butane-1-carboxylate (**1d**, 95.2 mg, 0.36 mmol) according to the **GP** at 100 °C for 3 h. Purification by flash chromatography on silica gel using petroleum ether/EtOAc (20/1 to 5/1) afforded *cis*-**3da** as a white solid (94.7 mg, 77% yield, d.r. = 93:7)

*cis*-**3da**:  $R_f$  = 0.35 (petroleum ether/EtOAc = 5/1). **<sup>1</sup>H NMR** (400 MHz, CDCl<sub>3</sub>): δ 7.69-7.64 (m, 4H), 7.46-7.41 (m, 1H), 7.33-7.23 (m, 9H), 7.18-7.14 (m, 1H), 6.91 (d,  $J$  = 8.8 Hz, 1H), 6.12-5.70 (m, 1H), 5.12 (s, 2H), 3.48-3.29 (m, 5H) ppm. **<sup>13</sup>C NMR** (100 MHz, CDCl<sub>3</sub>): δ 176.0, 150.6, 146.4, 135.7, 132.1, 129.7, 128.7, 128.63, 128.56, 128.5, 128.3, 128.2, 126.3, 126.2, 125.7, 124.4, 122.6, 118.7, 66.6, 46.1, 40.5, 34.5 ppm. **HRMS** (ESI)  $m/z$ : [M-H]<sup>-</sup> calcd. for C<sub>28</sub>H<sub>23</sub>O<sub>3</sub>: 407.1647; found: 407.1616 .



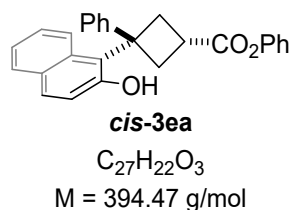

**(*cis*)-Phenyl-3-(2-hydroxynaphthalen-1-yl)-3-phenylcyclobutane-1-carboxylate** (*cis*-**3ea**): Prepared from naphthalen-2-ol (**2a**, 43.3 mg, 0.3 mmol) and phenyl 3-phenylbicyclo[1.1.0]butane-1-carboxylate (**1e**, 90.1 mg, 0.36 mmol) according to the **GP** at 100 °C for 3 h. Purification by flash chromatography on silica gel using petroleum ether/EtOAc (20/1 to 5/1) afforded *cis*-**3ea** as a white solid (76.1 mg, 64% yield, d.r. = 81:19).

*cis*-**3ea**:  $R_f$  = 0.40 (petroleum ether/EtOAc = 5/1).  $^1H$  NMR (400 MHz,  $CDCl_3$ ):  $\delta$  7.71-7.68 (m, 4H), 7.48 (d,  $J$  = 8.8 Hz, 1H), 7.36-7.27 (m, 6H), 7.20-7.16 (m, 2H), 7.04 (d,  $J$  = 8.0 Hz, 2H), 6.86 (d,  $J$  = 8.8 Hz, 1H), 5.60 (s, 1H), 3.63-3.56 (m, 1H), 3.38 (broad s, 4H) ppm.  $^{13}C$  NMR (100 MHz,  $CDCl_3$ ):  $\delta$  174.1, 150.6, 150.4, 146.2, 132.1, 129.8, 129.4, 128.77, 128.75, 128.6, 126.6, 126.5, 126.33, 126.29, 125.9, 124.4, 122.8, 121.4, 118.7, 46.1, 40.5, 34.7 ppm. **HRMS** (ESI)  $m/z$ :  $[M-H]^-$  calcd. for  $C_{27}H_{21}O_3$ : 393.1491; found: 393.1461.

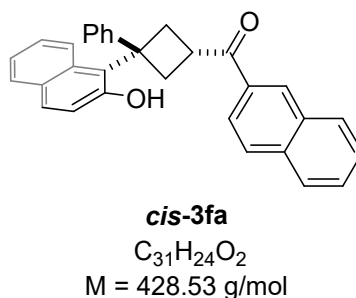

**(*cis*)-3-(2-hydroxynaphthalen-1-yl)-3-phenylcyclobutyl(naphthalen-2-yl)methanone** (*cis*-**3fa**) Prepared from naphthalen-2-ol (**2a**, 43.3 mg, 0.3 mmol) and naphthalen-2-yl(3-phenylbicyclo[1.1.0]butan-1-yl)methanone (**1f**, 102.4 mg, 0.36 mmol) according to the **GP** at 100 °C for 3 h. Purification by flash chromatography on silica gel using petroleum ether/EtOAc (10/1 to 5/1) afforded *cis*-**3fa** as a pale yellow solid (64.7 mg,

50% yield, d.r. = 86:14) together with trace amount of *trans*-**3fa**, which cannot be separated by chromatography.

*cis*-**3fa**:  $R_f$  = 0.35 (petroleum ether/EtOAc = 5/1).  $^1\text{H NMR}$  (400 MHz,  $\text{CDCl}_3$ ):  $\delta$  8.43 (s, 1H), 8.00 (d,  $J$  = 8.8 Hz, 1H), 7.95 (d,  $J$  = 7.6 Hz, 1H), 7.87-7.80 (m, 3H), 7.72 (d,  $J$  = 8.8 Hz, 1H), 7.67 (d,  $J$  = 8.0 Hz, 1H), 7.59-7.45 (m, 4H), 7.39-7.35 (m, 2H), 7.32-7.28 (m, 1H), 7.25-7.20 (m, 2H), 6.96 (d,  $J$  = 8.4 Hz, 1H), 6.10 (broad s, 1H), 4.37-4.28 (m, 1H), 3.56-3.27 (m, 4H) ppm.  $^{13}\text{C NMR}$  (100 MHz,  $\text{CDCl}_3$ ):  $\delta$  201.9, 150.7, 147.1, 135.7, 132.9, 132.5, 132.2, 130.2, 129.7, 129.6, 128.7, 128.6, 128.5, 128.4, 127.8, 126.8, 126.4, 126.3, 125.7, 125.6, 124.5, 124.2, 122.6, 118.8, 45.9, 40.8, 40.0, 38.7 ppm. **HRMS** (ESI)  $m/z$ :  $[\text{M}+\text{Na}]^+$  calcd. for  $\text{C}_{31}\text{H}_{24}\text{O}_2\text{Na}$ : 451.1669; found: 451.1161.

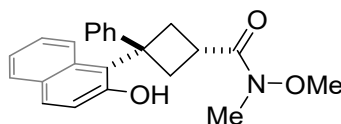

***cis*-3ga**

$\text{C}_{23}\text{H}_{23}\text{NO}_3$

$M = 361.44$  g/mol

**(*cis*)-3-(2-hydroxynaphthalen-1-yl)-N-methoxy-N-methyl-3-phenylcyclobutane-1-**

**carboxamide** (*cis*-**3ga**): Prepared from naphthalen-2-ol (**2a**, 43.3 mg, 0.3 mmol) and *N*-methoxy-*N*-methyl-3-phenylbicyclo[1.1.0]butane-1-carboxamide (**1g**, 78.2 mg, 0.36 mmol) according to the **GP** at 100 °C for 3 h. Purification by flash chromatography on silica gel using petroleum ether/EtOAc (5/1 to 2/1) afforded *cis*-**3ga** as a white solid (86.2 mg, 80% yield, d.r. > 98:2).

*cis*-**3ga**:  $R_f$  = 0.35 (petroleum ether/EtOAc = 2/1).  $^1\text{H NMR}$  (400 MHz,  $\text{CDCl}_3$ ):  $\delta$  8.23 (s, 1H), 7.74 (d,  $J$  = 7.6 Hz, 2H), 7.62 (d,  $J$  = 8.4 Hz, 1H), 7.57 (d,  $J$  = 8.0 Hz, 1H), 7.30-7.25 (m, 3H), 7.23-7.12 (m, 2H), 7.02 (d,  $J$  = 8.4 Hz, 1H), 6.86 (d,  $J$  = 8.8 Hz, 1H), 3.76-3.63 (m, 1H), 3.70 (s, 3H), 3.55-2.88 (m, 4H) 3.22 (s, 3H) ppm.  $^{13}\text{C NMR}$  (100 MHz,  $\text{CDCl}_3$ ):  $\delta$  176.6, 151.6, 147.3, 132.1, 129.2, 128.6, 128.3, 128.2, 126.4, 125.9, 125.8, 125.1, 124.1, 121.8, 118.7, 61.7, 46.2, 40.1, 32.4, 32.3 ppm. **HRMS** (ESI)  $m/z$ :  $[\text{M}+\text{Na}]^+$  calcd. for  $\text{C}_{23}\text{H}_{23}\text{NO}_3\text{Na}$ : 384.1570; found: 384.1564.

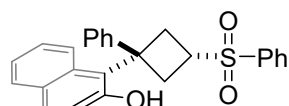**cis-3ha**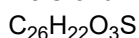

M = 414.52 g/mol

**(cis)-1-(1-phenyl-3-(phenylsulfonyl)cyclobutyl)naphthalen-2-ol ((cis)-3ha)**

Prepared from naphthalen-2-ol (**2a**, 28.8 mg, 0.2 mmol) and 1-phenyl-3-(phenylsulfonyl)bicyclo[1.1.0]butane (**1h**, 64.9 mg, 0.24 mmol) according to the **GP** at 100 °C for 3 h. Purification by flash chromatography on silica gel using petroleum ether/EtOAc (10/1 to 3/1) afforded *cis/trans*-**3ha** as a white solid (46.6 mg, 56% yield, d.r. = 67:33), which cannot be separated by chromatography.

**R<sub>f</sub>** = 0.30 (petroleum ether/EtOAc = 3/1). *cis*-**3ha**: **<sup>1</sup>H NMR** (400 MHz, CDCl<sub>3</sub>): δ 7.88 (d, *J* = 8.0 Hz, 2H), 7.72-7.69 (m, 1H), 7.64 (d, *J* = 8.8 Hz, 1H), 7.61-7.58 (m, 2H), 7.51 (d, *J* = 7.6 Hz, 2H), 7.47 (d, *J* = 7.6 Hz, 2H), 7.24-7.11 (m, 5H), 7.07 (d, *J* = 8.0 Hz, 1H), 3.79-3.59 (m, 2H), 3.58-3.36 (m, 2H), 3.25 (broad s, 1H) ppm. *trans*-**3ha**: **<sup>1</sup>H NMR** (400 MHz, CDCl<sub>3</sub>): δ 7.86 (d, *J* = 8.8 Hz, 2H), 7.72-7.69 (m, 1H), 7.65-7.58 (m, 1H), 7.57 (d, *J* = 8.4 Hz, 1H), 7.47 (d, *J* = 7.6 Hz, 2H), 7.34-7.30 (m, 1H), 7.24-7.11 (m, 7H), 6.98 (d, *J* = 8.4 Hz, 1H), 3.99-3.90 (m, 1H), 3.79-3.59 (m, 2H), 3.58-3.36 (m, 2H) ppm. *cis/trans*-**3ha**: **<sup>13</sup>C NMR** (100 MHz, CDCl<sub>3</sub>): δ 152.3, 150.6, 147.3, 145.4, 138.2, 138.0, 133.7, 132.7, 131.8, 130.1, 129.7, 129.6, 129.34, 129.30, 129.1, 128.9, 128.8, 128.6, 128.5, 128.2, 128.1, 126.6, 126.5, 126.4, 126.2, 126.0, 125.6, 125.5, 125.1, 123.8, 122.8, 122.7, 121.0, 119.2, 118.7, 54.3, 52.8, 45.1, 45.0, 37.9, 37.5 ppm. **HRMS** (ESI) *m/z*: [M+Na]<sup>+</sup> calcd. for C<sub>26</sub>H<sub>22</sub>O<sub>3</sub>SNa: 437.1182; found: 437.1172.

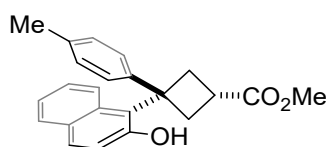**cis-3ia**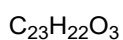

M = 346.43 g/mol

**(cis)-Methyl-3-(2-hydroxynaphthalen-1-yl)-3-(p-tolyl)cyclobutane-1-carboxylate** (*cis*-**3ia**): Prepared from naphthalen-2-ol (**2a**, 43.3 mg, 0.3 mmol) and methyl 3-(p-tolyl)bicyclo[1.1.0]butane-1-carboxylate (**1i**, 72.8 mg, 0.36 mmol) according to the **GP** at 100 °C for 3 h. Purification by flash chromatography on silica gel using petroleum ether/EtOAc (20/1 to 5/1) afforded *cis*-**3ia** as a white solid (78.9 mg, 76% yield, d.r. > 98:2)

*cis*-**3ia**:  $R_f$  = 0.35 (petroleum ether/EtOAc = 5/1). **<sup>1</sup>H NMR** (400 MHz, CDCl<sub>3</sub>): δ 7.68 (d,  $J$  = 8.4 Hz, 1H), 7.64 (d,  $J$  = 8.4 Hz, 1H), 7.52 (d,  $J$  = 7.6 Hz, 2H), 7.43 (d,  $J$  = 8.8 Hz, 1H), 7.34-7.30 (m, 1H), 7.26-7.22 (m, 1H), 7.09 (d,  $J$  = 7.6 Hz, 2H), 6.92 (d,  $J$  = 8.8 Hz, 1H), 5.98 (s, 1H), 3.66 (s, 3H), 3.43-3.25 (m, 5H), 2.27 (s, 3H) ppm. **<sup>13</sup>C NMR** (100 MHz, CDCl<sub>3</sub>): δ 176.5, 150.6, 143.5, 135.7, 132.1, 129.7, 129.2, 128.7, 128.5, 126.6, 126.1, 125.7, 124.4, 122.6, 118.7, 51.9, 45.6, 40.6, 34.4, 20.9 ppm. **HRMS** (ESI)  $m/z$ : [M-H]<sup>-</sup> calcd. for C<sub>23</sub>H<sub>21</sub>O<sub>3</sub>: 345.1491; found: 345.1466.

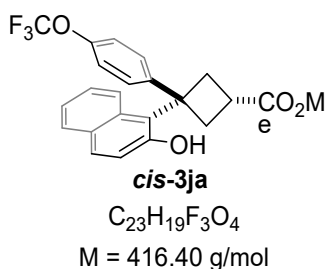

**(cis)-methyl-3-(2-hydroxynaphthalen-1-yl)-3-(4-(trifluoromethoxy)phenyl)cyclobutane-1-carboxylate** (*cis*-**3ja**): Prepared from naphthalen-2-ol (**2a**, 43.3 mg, 0.3 mmol) and methyl 3-(4-(trifluoromethoxy)phenyl)bicyclo[1.1.0]butane-1-carboxylate (**1j**, 97.9 mg, 0.36 mmol) according to the **GP** at 100 °C for 3 h. Purification by flash chromatography on silica gel using petroleum ether/EtOAc (20/1 to 5/1) afforded *cis*-**3ja** as a white solid (92.4 mg, 74% yield, d.r. = 92:8).

*cis*-**3ja**:  $R_f$  = 0.40 (petroleum ether/EtOAc = 5/1). **<sup>1</sup>H NMR** (400 MHz, CDCl<sub>3</sub>): δ 7.71-7.66 (m, 3H), 7.61 (d,  $J$  = 8.8 Hz, 1H), 7.51-7.44 (m, 1H), 7.37-7.33 (m, 1H), 7.26 (d,  $J$  = 7.2 Hz, 1H), 7.11 (d,  $J$  = 8.4 Hz, 2H), 6.93 (d,  $J$  = 8.8 Hz, 1H), 5.94 (broad s, 1H), 3.67 (s, 3H), 3.37-3.26 (m, 5H) ppm. **<sup>13</sup>C NMR** (100 MHz, CDCl<sub>3</sub>): δ 176.8, 150.7, 147.5,

145.3, 131.9, 129.6, 128.9, 127.8, 125.9, 125.8, 124.3, 124.0, 122.7, 120.8, 120.4 (q,  $J = 255.3$  Hz), 118.6, 52.1, 45.7, 40.5, 34.3 ppm.  **$^{19}\text{F}$  NMR** (376 MHz,  $\text{CDCl}_3$ ):  $\delta$  -57.81 ppm.

**HRMS** (ESI)  $m/z$ :  $[\text{M}-\text{H}]^-$  calcd. for  $\text{C}_{23}\text{H}_{18}\text{F}_3\text{O}_4$ : 415.1163; found: 415.1160.

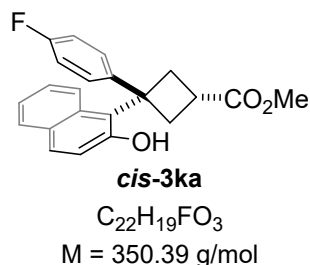

**(*cis*)-Methyl-3-(4-fluorophenyl)-3-(2-hydroxynaphthalen-1-yl)cyclobutane-1-**

**carboxylate (*cis*-3ha):** Prepared from naphthalen-2-ol (**2a**, 43.3 mg, 0.3 mmol) and methyl 3-(4-fluorophenyl)bicyclo[1.1.0]butane-1-carboxylate (**1k**, 74.2 mg, 0.36 mmol) according to the **GP** at 100 °C for 3 h. Purification by flash chromatography on silica gel using petroleum ether/EtOAc (20/1 to 5/1) afforded ***cis*-3ka** as a white solid (84.6 mg, 80% yield, d.r. > 98:2)

***cis*-3ka:**  $R_f = 0.40$  (petroleum ether/EtOAc = 5/1).  **$^1\text{H}$  NMR** (400 MHz,  $\text{CDCl}_3$ ):  $\delta$  7.67-7.58 (m, 4H), 7.35-7.31 (m, 2H), 7.26-7.22 (m, 1H), 6.96-6.88 (m, 3H), 6.60 (s, 1H), 3.68 (s, 3H), 3.48-3.25 (m, 5H) ppm.  **$^{13}\text{C}$  NMR** (100 MHz,  $\text{CDCl}_3$ ):  $\delta$  176.9, 161.3 (d,  $J = 243.1$  Hz), 150.6, 142.2 (d,  $J = 3.2$  Hz), 131.9, 129.5, 128.8, 128.7, 127.9 (d,  $J = 7.8$  Hz), 126.1, 125.8, 124.0, 122.6, 118.6, 115.0 (d,  $J = 20.9$  Hz), 52.1, 45.6, 40.6, 34.3 ppm.  **$^{19}\text{F}$  NMR** (376 MHz,  $\text{CDCl}_3$ ):  $\delta$  -117.25 ppm. **HRMS** (ESI)  $m/z$ :  $[\text{M}-\text{H}]^-$  calcd. for  $\text{C}_{22}\text{H}_{18}\text{FO}_3$ : 349.1240; found: 349.1212.

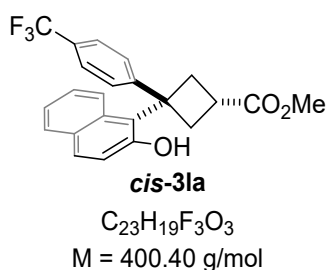

**(*cis*)-Methyl-3-(2-hydroxynaphthalen-1-yl)-3-(4(trifluoromethyl)phenyl)cyclobutane-1-**

**carboxylate (*cis*-3ia):** Prepared from naphthalen-2-ol (**2a**, 43.3 mg, 0.3 mmol) and methyl 3-(4-(trifluoromethyl)phenyl)bicyclo[1.1.0]butane-1-carboxylate (**1l**, 92.2 mg,

0.36 mmol) according to the **GP** at 100 °C for 3 h. Purification by flash chromatography on silica gel using petroleum ether/EtOAc (20/1 to 5/1) afforded *cis*-**3la** as a white solid (29.5 mg, 25% yield, d.r. > 98:2)

*cis*-**3la**:  $R_f$  = 0.30 (petroleum ether/EtOAc = 5/1)  $^1\text{H NMR}$  (400 MHz,  $\text{CDCl}_3$ ):  $\delta$  7.76-7.73 (m, 3H), 7.65 (d,  $J$  = 8.4 Hz, 1H), 7.53-7.47 (m, 3H), 7.35-7.25 (m, 2H), 7.00 (d,  $J$  = 8.8 Hz, 1H), 5.75 (broad s, 1H), 3.67 (s, 3H), 3.59-3.54 (m, 2H), 3.40-3.37 (m, 2H), 3.14-3.08 (m, 1H) ppm.  $^{13}\text{C NMR}$  (100 MHz,  $\text{CDCl}_3$ ):  $\delta$  176.6, 151.6, 150.9, 132.2, 130.0, 129.3, 128.9, 128.1 (q,  $J$  = 32.2 Hz), 126.9, 125.9, 125.2 (q,  $J$  = 3.8 Hz), 124.7, 124.2 (q,  $J$  = 270.2 Hz), 123.0, 118.9, 52.0, 47.7, 39.7, 33.7 ppm.  $^{19}\text{F NMR}$  (376 MHz,  $\text{CDCl}_3$ ):  $\delta$  -62.38 ppm. **HRMS** (ESI)  $m/z$ :  $[\text{M}-\text{H}]^-$  calcd. for  $\text{C}_{23}\text{H}_{18}\text{F}_3\text{O}_3$ : 399.1208; found: 399.1178.

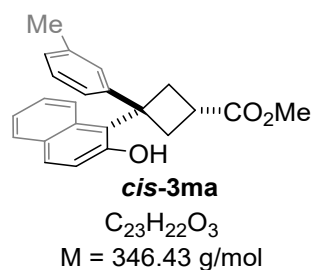

**(*cis*)-Methyl-3-(2-hydroxynaphthalen-1-yl)-3-(*m*-tolyl)cyclobutane-1-carboxylate** (*cis*-**3ma**): Prepared from naphthalen-2-ol (**2a**, 43.3 mg, 0.3 mmol) and methyl 3-(*m*-tolyl)bicyclo[1.1.0]butane-1-carboxylate (**1m**, 72.8 mg, 0.36 mmol) according to the **GP** at 100 °C for 3 h. Purification by flash chromatography on silica gel using petroleum ether/EtOAc (20/1 to 5/1) afforded *cis*-**3ma** as a white solid (78.2 mg, 75% yield, d.r. > 98:2).

*cis*-**3ma**:  $R_f$  = 0.40 (petroleum ether/EtOAc = 5/1).  $^1\text{H NMR}$  (400 MHz,  $\text{CDCl}_3$ ):  $\delta$  7.68 (d,  $J$  = 8.0 Hz, 1H), 7.64 (d,  $J$  = 8.8 Hz, 1H), 7.45-7.41 (m, 3H), 7.34-7.30 (m, 1H), 7.26-7.22 (m, 1H), 7.19-7.15 (m, 1H), 6.99 (d,  $J$  = 7.6 Hz, 1H), 6.92 (d,  $J$  = 8.8 Hz, 1H), 6.01-5.94 (m, 1H), 3.66 (s, 3H), 3.44-3.25 (m, 5H), 2.30 (s, 3H) ppm.  $^{13}\text{C NMR}$  (100 MHz,  $\text{CDCl}_3$ ):  $\delta$  176.5, 150.6, 146.4, 138.0, 132.2, 129.7, 128.7, 128.6, 128.4, 127.1,

126.9, 126.6, 125.7, 124.5, 123.3, 122.6, 118.7, 51.9, 45.9, 40.5, 34.4, 21.8 ppm.

**HRMS** (ESI)  $m/z$ :  $[M-H]^-$  calcd. for  $C_{23}H_{21}O_3$ : 345.1491; found: 345.1465.

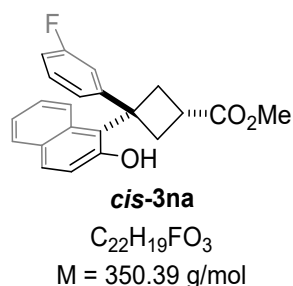

**(*cis*)-Methyl-3-(3-fluorophenyl)-3-(2-hydroxynaphthalen-1-yl)cyclobutane-1-**

**carboxylate (*cis*-3na):** Prepared from naphthalen-2-ol (**2a**, 43.3 mg, 0.3 mmol) and methyl 3-(3-fluorophenyl)bicyclo[1.1.0]butane-1-carboxylate (**1n**, 74.2 mg, 0.36 mmol) according to the **GP** at 100 °C for 3 h. Purification by flash chromatography on silica gel using petroleum ether/EtOAc (20/1 to 5/1) afforded *cis/trans*-**3na** as a white solid (80 mg, 76% yield, d.r. = 80:20), which cannot be separated by chromatography.

$R_f = 0.40$  (petroleum ether/EtOAc = 5/1). *cis*-**3na**:  **$^1H$  NMR** (400 MHz,  $CDCl_3$ ):  $\delta$  7.67 (d,  $J = 7.6$  Hz, 1H), 7.59 (d,  $J = 8.8$  Hz, 1H), 7.46-7.16 (m, 6H), 6.91-6.79 (m, 2H), 6.47 (s, 1H), 3.68 (s, 3H), 3.53-3.05 (m, 5H) ppm.  **$^{19}F$  NMR** (376 MHz,  $CDCl_3$ ):  $\delta$  -112.99 ppm. *trans*-**3na**:  **$^1H$  NMR** (400 MHz,  $CDCl_3$ ):  $\delta$  7.72 (d,  $J = 8.0$  Hz, 1H), 7.55 (d,  $J = 8.8$  Hz, 1H), 7.46-7.16 (m, 6H), 7.00-6.97 (m, 1H), 6.91-6.79 (m, 1H), 6.00 (s, 1H), 3.68 (s, 3H), 3.53-3.05 (m, 5H) ppm.  **$^{19}F$  NMR** (376 MHz,  $CDCl_3$ ):  $\delta$  -113.15 ppm. *cis/trans*-**3na**:  **$^{13}C$  NMR** (100 MHz,  $CDCl_3$ ):  $\delta$  176.8, 176.7, 163.1 (d,  $J = 243.2$  Hz), 162.9 (d,  $J = 243.2$  Hz), 150.9, 150.8, 150.2 (d,  $J = 6.7$  Hz), 149.4 (d,  $J = 6.6$  Hz), 132.3, 132.0, 129.9, 129.8, 129.7, 129.6, 129.5, 129.0, 128.8 (d,  $J = 3.1$  Hz), 125.9, 125.7 (d,  $J = 3.9$  Hz), 124.9, 124.8, 124.1, 122.8, 122.6, 122.0 (d,  $J = 2.6$  Hz), 121.7 (d,  $J = 2.6$  Hz), 118.9, 118.6, 113.8 (d,  $J = 22.1$  Hz), 113.7 (d,  $J = 21.9$  Hz), 113.0 (d,  $J = 21.0$  Hz), 112.9 (d,  $J = 20.9$  Hz), 52.0, 47.8, 46.0, 40.4, 34.3, 33.8 ppm. **HRMS** (ESI)  $m/z$ :  $[M-H]^-$  calcd. for  $C_{22}H_{18}FO_3$ : 349.1240; found: 349.1213.

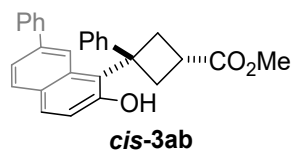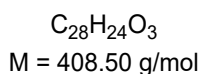

**(*cis*)-Methyl-3-(2-hydroxy-7-phenylnaphthalen-1-yl)-3-phenylcyclobutane-1-carboxylate**

(*cis*-**3ab**): Prepared from 7-phenylnaphthalen-2-ol (**2b**, 66.1 mg, 0.3 mmol) and methyl 3-phenylbicyclo[1.1.0]butane-1-carboxylate (**1a**, 67.8 mg, 0.36 mmol) according to the **GP** at 100 °C for 3 h. Purification by flash chromatography on silica gel using petroleum ether/EtOAc (20/1 to 5/1) afforded *cis*-**3ab** as a white solid (113.0 mg, 92% yield, d.r. > 98:2).

*cis*-**3ab**:  $R_f$  = 0.40 (petroleum ether/EtOAc = 5/1).  $^1H$  NMR (400 MHz, Acetone- $d_6$ ):  $\delta$  8.87-8.86 (m, 1H), 7.97-7.96 (m, 1H), 7.85-7.82 (m, 3H), 7.71-7.66 (m, 3H), 7.55 (d,  $J$  = 8.4 Hz, 1H), 7.49-7.45 (m, 2H), 7.36-7.25 (m, 4H), 7.15-7.12 (m, 1H), 3.58 (s, 3H), 3.30-3.05 (m, 5H) ppm.  $^{13}C$  NMR (100 MHz, Acetone- $d_6$ ):  $\delta$  175.6, 153.0, 148.1, 142.2, 138.7, 133.4, 130.2, 129.8, 129.6, 129.2, 129.0, 128.1, 127.9, 127.8, 127.2, 126.8, 123.1, 122.6, 120.1, 51.7, 47.1, 41.5, 34.9 ppm. **HRMS** (ESI)  $m/z$ :  $[M-H]^-$  calcd. for  $C_{28}H_{23}O_3$ : 407.1647; found: 407.1614.

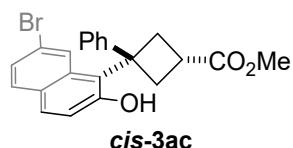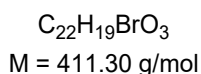

**(*cis*)-Methyl-3-(7-bromo-2-hydroxynaphthalen-1-yl)-3-phenylcyclobutane-1-carboxylate**

(*cis*-**3ac**): Prepared from 7-bromonaphthalen-2-ol (**2c**, 66.9 mg, 0.3 mmol) and methyl 3-phenylbicyclo[1.1.0]butane-1-carboxylate (**1a**, 67.8 mg, 0.36 mmol) according to the **GP** at 100 °C for 3 h. Purification by flash chromatography on silica gel using petroleum ether/EtOAc (20/1 to 5/1) afforded *cis/trans*-**3ac** as a white solid (90.4 mg, 73% yield, d.r. = 78:22), which cannot be separated by chromatography.



$R_f = 0.35$  (petroleum ether/EtOAc = 5/1). **cis-3ac**:  $^1\text{H NMR}$  (400 MHz,  $\text{CDCl}_3$ ):  $\delta$  7.79 (s, 1H), 7.65 (d,  $J = 7.6$  Hz, 2H), 7.48 (d,  $J = 8.8$  Hz, 1H), 7.31-7.12 (m, 5H), 6.88 (d,  $J = 8.8$  Hz, 1H), 6.78 (s, 1H), 3.70 (s, 3H), 3.51-3.04 (m, 5H) ppm. **trans-3ac**:  $^1\text{H NMR}$  (400 MHz,  $\text{CDCl}_3$ ):  $\delta$  7.79 (s, 1H), 7.59 (d,  $J = 8.4$  Hz, 2H), 7.55 (d,  $J = 4.0$  Hz, 1H), 7.31-7.12 (m, 5H), 7.00 (d,  $J = 8.8$  Hz, 1H), 6.08 (s, 1H), 3.66 (s, 3H), 3.51-3.04 (m, 5H) ppm. **cis/trans-3ka**:  $^{13}\text{C NMR}$  (100 MHz,  $\text{CDCl}_3$ ):  $\delta$  177.0, 176.7, 151.8, 151.5, 146.6, 145.9, 133.6, 133.3, 130.3, 128.7, 128.6, 128.44, 128.42, 128.2, 127.9, 127.2, 126.5, 126.43, 126.36, 126.24, 126.20, 126.1, 125.8, 125.6, 125.0, 120.1, 119.3, 119.0, 52.14, 52.05, 47.6, 45.8, 40.4, 39.7, 34.3, 33.9 ppm. **HRMS** (ESI)  $m/z$ :  $[\text{M}-\text{H}]^-$  calcd. for  $\text{C}_{22}\text{H}_{18}\text{BrO}_3$ : 409.0440; found: 409.0409.

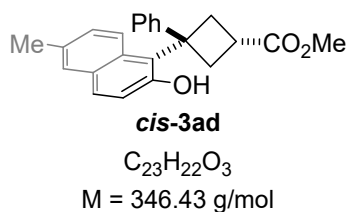

**(cis)-Methyl-3-(2-hydroxy-6-methylnaphthalen-1-yl)-3-phenylcyclobutane-1-carboxylate**

**(cis-3ad)**: Prepared from 6-methylnaphthalen-2-ol (**2d**, 47.5 mg, 0.3 mmol) and methyl 3-phenylbicyclo[1.1.0]butane-1-carboxylate (**1a**, 67.8 mg, 0.36 mmol) according to the **GP** at 100 °C for 3 h. Purification by flash chromatography on silica gel using petroleum ether/EtOAc (20/1 to 5/1) afforded **cis-3ad** as a white solid (79.7 mg, 77% yield, d.r. = 92:8).

**cis-3ad**:  $R_f = 0.40$  (petroleum ether/EtOAc = 5/1).  $^1\text{H NMR}$  (400 MHz,  $\text{CDCl}_3$ ):  $\delta$  7.63 (d,  $J = 7.2$  Hz, 2H), 7.55 (d,  $J = 8.8$  Hz, 1H), 7.46 (s, 1H), 7.42-7.39 (m, 1H), 7.29-7.25 (m, 2H), 7.17-7.12 (m, 2H), 6.90 (d,  $J = 8.4$  Hz, 1H), 5.67 (broad s, 1H), 3.65 (s, 3H), 3.41-3.22 (m, 5H), 2.41 (s, 3H) ppm.  $^{13}\text{C NMR}$  (100 MHz,  $\text{CDCl}_3$ ):  $\delta$  176.3, 150.0, 146.5, 132.0, 130.3, 130.0, 128.5, 127.98, 127.96, 127.8, 126.5, 126.3, 126.2, 124.3, 118.8, 51.8, 46.0, 40.5, 34.4, 21.1 ppm. **HRMS** (ESI)  $m/z$ :  $[\text{M}-\text{H}]^-$  calcd. for  $\text{C}_{23}\text{H}_{21}\text{O}_3$ : 345.1491; found: 345.1465.

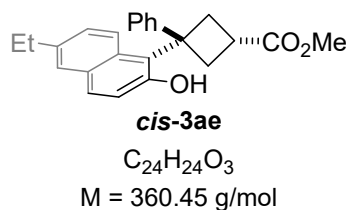

**(*cis*)-Methyl-3-(6-ethyl-2-hydroxynaphthalen-1-yl)-3-phenylcyclobutane-1-carboxylate**

(*cis*-3ae): Prepared from 6-ethylnaphthalen-2-ol (**2e**, 51.7 mg, 0.3 mmol) and methyl 3-phenylbicyclo[1.1.0]butane-1-carboxylate (**1a**, 67.8 mg, 0.36 mmol) according to the **GP** at 100 °C for 3 h. Purification by flash chromatography on silica gel using petroleum ether/EtOAc (20/1 to 5/1) afforded *cis*-3ae as a white solid (83.2 mg, 77% yield, d.r. = 91:9).

*cis*-3ae:  $R_f$  = 0.40 (petroleum ether/EtOAc = 5/1). **<sup>1</sup>H NMR** (400 MHz, CDCl<sub>3</sub>): δ 7.64 (d,  $J$  = 7.2 Hz, 2H), 7.58 (d,  $J$  = 9.2 Hz, 1H), 7.47 (s, 1H), 7.40 (dd,  $J$  = 8.8 and 2.8 Hz, 1H), 7.29-7.25 (m, 2H), 7.23-7.14 (m, 2H), 6.91-6.88 (m, 1H), 5.94-5.86 (m, 1H), 3.65 (s, 3H), 3.40-3.26 (m, 5H), 2.72 (q,  $J$  = 7.6 Hz, 2H), 1.27 (t,  $J$  = 7.6 Hz, 3H) ppm. **<sup>13</sup>C NMR** (100 MHz, CDCl<sub>3</sub>): δ 176.4, 150.0, 146.5, 138.3, 130.5, 129.9, 128.5, 128.1, 126.9, 126.4, 126.3, 126.1, 124.4, 118.7, 51.9, 46.0, 40.5, 34.4, 28.4, 15.4 ppm. **HRMS** (ESI)  $m/z$ : [M-H]<sup>-</sup> calcd. for C<sub>24</sub>H<sub>23</sub>O<sub>3</sub>: 359.1647; found: 359.1618.

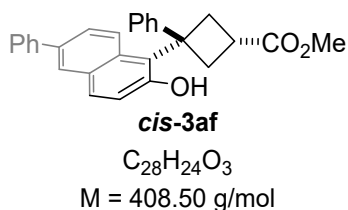

**(*cis*)-Methyl-3-(2-hydroxy-6-phenylnaphthalen-1-yl)-3-phenylcyclobutane-1-carboxylate**

(*cis*-3af): Prepared from 6-phenylnaphthalen-2-ol (**2f**, 51.7 mg, 0.3 mmol) and methyl 3-phenylbicyclo[1.1.0]butane-1-carboxylate (**1a**, 67.8 mg, 0.36 mmol) according to the **GP** at 100 °C for 3 h. Purification by flash chromatography on silica gel using petroleum ether/EtOAc (20/1 to 5/1) afforded *cis*-3af as a white solid (92.8 mg, 76% yield, d.r. = 88:12).

*cis*-**3af**:  $R_f$  = 0.40 (petroleum ether/EtOAc = 5/1).  $^1\text{H NMR}$  (400 MHz,  $\text{CDCl}_3$ ):  $\delta$  7.82 (s, 1H), 7.73-7.59 (m, 6H), 7.45-7.41 (m, 2H), 7.37-7.33 (m, 2H), 7.30-7.27 (m, 2H), 7.16 (t,  $J$  = 7.6 Hz, 1H), 6.92 (d,  $J$  = 8.4 Hz, 1H), 6.37 (s, 1H), 3.68 (s, 3H), 3.44-3.31 (m, 5H) ppm.  $^{13}\text{C NMR}$  (100 MHz,  $\text{CDCl}_3$ ):  $\delta$  176.8, 150.8, 146.4, 140.9, 135.0, 131.3, 129.9, 128.9, 128.8, 128.5, 127.02, 126.96, 126.6, 126.29, 126.28, 126.2, 125.2, 124.8, 119.1, 52.0, 46.0, 40.5, 34.4 ppm. **HRMS** (ESI)  $m/z$ :  $[\text{M}-\text{H}]^-$  calcd. for  $\text{C}_{28}\text{H}_{23}\text{O}_3$ : 407.1647; found: 407.1616.

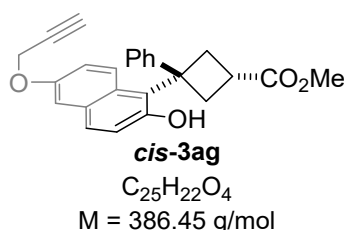

**(*cis*)-Methyl-3-(2-hydroxy-6-(prop-2-yn-1-yloxy)naphthalen-1-yl)-3-phenylcyclobutane-1-carboxylate (*cis*-3ag)**: Prepared from 6-(prop-2-yn-1-yloxy)naphthalen-2-ol (**2g**, 59.5 mg, 0.3 mmol) and methyl 3-phenylbicyclo[1.1.0]butane-1-carboxylate (**1a**, 67.8 mg, 0.36 mmol) according to the **GP** at 100 °C for 3 h. Purification by flash chromatography on silica gel using petroleum ether/EtOAc (20/1 to 5/1) afforded *cis*-**3ag** as a yellow solid (49.8 mg, 43% yield, d.r. = 93:7).

*cis*-**3ag**:  $R_f$  = 0.30 (petroleum ether/EtOAc = 5/1).  $^1\text{H NMR}$  (400 MHz,  $\text{CDCl}_3$ ):  $\delta$  7.62 (d,  $J$  = 7.6 Hz, 2H), 7.57 (d,  $J$  = 9.2 Hz, 1H), 7.41-7.36 (m, 1H), 7.30-7.24 (m, 2H), 7.18-7.13 (m, 2H), 7.06 (d,  $J$  = 9.2 Hz, 1H), 6.91 (d,  $J$  = 9.2 Hz, 1H), 5.82-5.64 (m, 1H), 4.74 (s, 2H), 3.66 (s, 3H), 3.40- 3.24 (m, 5H), 2.53 (s, 1H) ppm.  $^{13}\text{C NMR}$  (100 MHz,  $\text{CDCl}_3$ ):  $\delta$  176.3, 153.0, 149.4, 146.4, 130.4, 128.5, 127.8, 127.5, 126.9, 126.2, 126.0, 119.3, 118.1, 108.9, 78.7, 75.5, 55.8, 51.9, 46.0, 40.5, 34.3 ppm. **HRMS** (ESI)  $m/z$ :  $[\text{M}-\text{H}]^-$  calcd. for  $\text{C}_{25}\text{H}_{21}\text{O}_4$ : 385.1440; found: 385.1411.

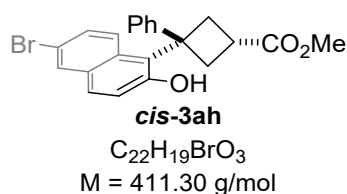

**(*cis*)-Methyl-3-(6-bromo-2-hydroxynaphthalen-1-yl)-3-phenylcyclobutane-1-carboxylate**

(*cis*-**3ah**): Prepared from 6-bromonaphthalen-2-ol (**2h**, 66.9 mg, 0.3 mmol) and methyl 3-phenylbicyclo[1.1.0]butane-1-carboxylate (**1a**, 67.8 mg, 0.36 mmol) according to the **GP** at 100 °C for 3 h. Purification by flash chromatography on silica gel using petroleum ether/EtOAc (20/1 to 5/1) afforded *cis*-**3ah** as a white solid (89.4 mg, 73% yield, d.r. = 93:7).

*cis*-**3ah**:  $R_f$  = 0.35 (petroleum ether/EtOAc = 5/1).  $^1\text{H NMR}$  (400 MHz,  $\text{CDCl}_3$ ):  $\delta$  7.78 (s, 1H), 7.61 (d,  $J$  = 7.6 Hz, 2H), 7.49 (d,  $J$  = 9.2 Hz, 1H), 7.37 (dd,  $J$  = 9.2 Hz and 2.4 Hz, 1H), 7.30-7.24 (m, 2H), 7.20-7.15 (m, 2H), 6.90 (d,  $J$  = 8.8 Hz, 1H), 6.58 (s, 1H), 3.69 (s, 3H), 3.45-3.25 (m, 5H) ppm.  $^{13}\text{C NMR}$  (100 MHz,  $\text{CDCl}_3$ ):  $\delta$  176.9, 151.0, 146.1, 130.8, 130.58, 130.56, 128.8, 128.6, 127.6, 126.6, 126.3, 126.2, 126.0, 119.7, 116.2, 52.1, 45.9, 40.4, 34.3 ppm. **HRMS** (ESI)  $m/z$ :  $[\text{M}-\text{H}]^-$  calcd. for  $\text{C}_{22}\text{H}_{18}\text{BrO}_3$ : 409.0440; found: 409.0406.

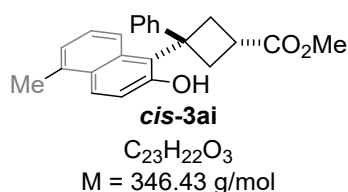

**(*cis*)-Methyl-3-(2-hydroxy-5-methylnaphthalen-1-yl)-3-phenylcyclobutane-1-carboxylate**

((*cis*)-**3ai**): Prepared from 5-methylnaphthalen-2-ol (**2i**, 66.9 mg, 0.3 mmol) and methyl 3-phenylbicyclo[1.1.0]butane-1-carboxylate (**1a**, 67.8 mg, 0.36 mmol) according to the **GP** at 100 °C for 3 h. Purification by flash chromatography on silica gel using petroleum ether/EtOAc (20/1 to 5/1) afforded *cis*-**3ai** as a white solid (81.3 mg, 78% yield, d.r. = 93:7).

*cis*-**3ai**:  $R_f$  = 0.35 (petroleum ether/EtOAc = 5/1).  $^1\text{H NMR}$  (400 MHz,  $\text{CDCl}_3$ ):  $\delta$  7.66-7.62 (m, 3H), 7.50 (d,  $J$  = 8.8 Hz, 1H), 7.29-7.25 (m, 2H), 7.23-7.16 (m, 2H), 7.08 (d,  $J$  = 6.8 Hz, 1H), 6.97 (d,  $J$  = 8.8 Hz, 1H), 6.19-6.07 (m, 1H), 3.66 (s, 3H), 3.43-3.26 (m, 5H), 2.57 (s, 3H) ppm.  $^{13}\text{C NMR}$  (100 MHz,  $\text{CDCl}_3$ ):  $\delta$  176.5, 150.5, 146.6, 134.8, 132.3, 128.6, 128.5, 127.0, 126.3, 126.1, 125.5, 124.6, 123.7, 123.0, 118.3, 51.9, 46.1, 40.6, 34.4, 19.9 ppm. **HRMS** (ESI)  $m/z$ :  $[\text{M}-\text{H}]^-$  calcd. for  $\text{C}_{23}\text{H}_{21}\text{O}_3$ : 345.1491; found: 345.1465.

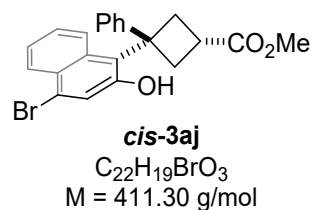

**(cis)-methyl-3-(4-bromo-2-hydroxynaphthalen-1-yl)-3-phenylcyclobutane-1-carboxylate**

((*cis*)-**3aj**): Prepared from 4-bromonaphthalen-2-ol (**2j**, 66.9 mg, 0.3 mmol) and methyl 3-phenylbicyclo[1.1.0]butane-1-carboxylate (**1a**, 67.8 mg, 0.36 mmol) according to the **GP** at 100 °C for 3 h. Purification by flash chromatography on silica gel using petroleum ether/EtOAc (20/1 to 5/1) afforded *cis*-**3aj** as a white solid (83.2 mg, 82% yield, d.r. > 98:2).

*cis*-**3aj**:  $R_f$  = 0.35 (petroleum ether/EtOAc = 5/1).  $^1H$  NMR (400 MHz, Acetone- $d_6$ ):  $\delta$  9.11 (s, 1H), 8.10 (d,  $J$  = 8.4 Hz, 1H), 7.77-7.74 (m, 3H), 7.65 (s, 1H), 7.42-7.35 (m, 2H), 7.32-7.28 (m, 2H), 7.18-7.14 (m, 1H), 3.59 (s, 3H), 3.32-3.23 (m, 2H), 3.14-3.06 (m, 3H) ppm.  $^{13}C$  NMR (100 MHz, Acetone- $d_6$ ):  $\delta$  175.5, 152.4, 147.6, 134.0, 129.2, 128.3, 128.2, 128.1, 127.3, 127.1, 126.9, 125.8, 124.7, 123.7, 122.0, 51.7, 46.8, 41.2, 34.7 ppm. HRMS (ESI)  $m/z$ : [M-H]<sup>-</sup> calcd. for  $C_{22}H_{18}BrO_3$ : 409.0440; found: 409.0439.

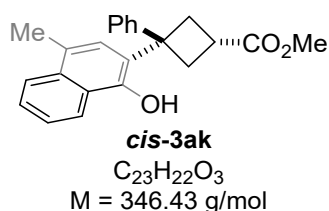

**(cis)-methyl-3-(1-hydroxy-4-methylnaphthalen-2-yl)-3-phenylcyclobutane-1-carboxylate**

((*cis*)-**3ak**): Prepared from 4-methylnaphthalen-1-ol (**2k**, 47.5 mg, 0.3 mmol) and methyl 3-phenylbicyclo[1.1.0]butane-1-carboxylate (**1a**, 67.8 mg, 0.36 mmol) according to the **GP** at 100 °C for 3 h. Purification by flash chromatography on silica gel using petroleum ether/EtOAc (20/1 to 5/1) afforded *cis*-**3ak** as a white solid (79.4 mg, 76% yield, d.r. = 88:12).

*cis*-**3ak**:  $R_f = 0.55$  (petroleum ether/EtOAc = 5/1).  $^1\text{H NMR}$  (400 MHz,  $\text{CDCl}_3$ ):  $\delta$  7.99 (d,  $J = 8.0$  Hz, 1H), 7.88 (d,  $J = 8.0$  Hz, 1H), 7.49 (d,  $J = 7.6$  Hz, 2H), 7.46-7.38 (m, 2H), 7.31-7.27 (m, 2H), 7.25 (s, 1H), 7.22-7.16 (m, 1H), 4.93 (s, 1H), 3.64 (s, 3H), 3.31-3.22 (m, 1H), 3.07 (d,  $J = 8.8$  Hz, 4H), 2.64 (s, 3H) ppm.  $^{13}\text{C NMR}$  (100 MHz,  $\text{CDCl}_3$ ):  $\delta$  175.2, 145.9, 145.5, 132.2, 128.8, 128.7, 126.54, 126.49, 126.2, 125.5, 125.4, 125.2, 125.1, 124.2, 121.1, 51.8, 45.1, 37.5, 33.4, 19.1 ppm. **HRMS** (ESI)  $m/z$ :  $[\text{M}-\text{H}]^-$  calcd. for  $\text{C}_{23}\text{H}_{21}\text{O}_3$ : 345.1491; found: 345.1489.

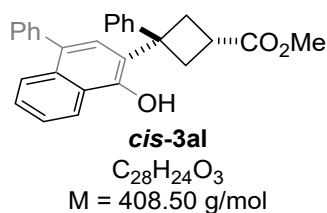

**(*cis*)-methyl-3-(1-hydroxy-4-phenylnaphthalen-2-yl)-3-phenylcyclobutane-1-carboxylate**

((*cis*)-**3al**): Prepared from 4-phenylnaphthalen-1-ol (**2I**, 66.1 mg, 0.3 mmol) and methyl 3-phenylbicyclo[1.1.0]butane-1-carboxylate (**1a**, 67.8 mg, 0.36 mmol) according to the **GP** at 100 °C for 3 h. Purification by flash chromatography on silica gel using petroleum ether/EtOAc (20/1 to 5/1) afforded *cis*-**3al** as a white solid (85.4 mg, 70% yield, d.r. = 89:11).

*cis*-**3al**:  $R_f = 0.50$  (petroleum ether/EtOAc = 5/1).  $^1\text{H NMR}$  (400 MHz,  $\text{CDCl}_3$ ):  $\delta$  8.04 (d,  $J = 8.0$  Hz, 1H), 7.85 (d,  $J = 8.0$  Hz, 1H), 7.54-7.47 (m, 6H), 7.43-7.39 (m, 3H), 7.37-7.29 (m, 3H), 7.21-7.18 (m, 1H), 5.14 (s, 1H), 3.64 (s, 3H), 3.32-3.23 (m, 1H), 3.10 (d,  $J = 8.8$  Hz, 4H) ppm.  $^{13}\text{C NMR}$  (100 MHz,  $\text{CDCl}_3$ ):  $\delta$  175.1, 147.1, 145.2, 140.8, 133.0, 131.3, 130.3, 128.8, 128.6, 128.2, 127.0, 126.6, 126.2, 126.0, 125.84, 125.78, 125.3, 125.2, 120.8, 51.8, 45.2, 37.5, 33.4 ppm. **HRMS** (ESI)  $m/z$ :  $[\text{M}-\text{H}]^-$  calcd. for  $\text{C}_{28}\text{H}_{23}\text{O}_3$ : 407.1647; found: 407.1646.

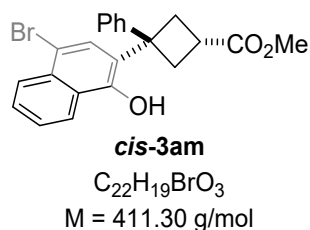

**(cis)-Methyl-3-(4-bromo-1-hydroxynaphthalen-2-yl)-3-phenylcyclobutane-1-carboxylate**

**(cis-3am)**: Prepared from 4-bromonaphthalen-1-ol (**2m**, 66.9 mg, 0.3 mmol) and methyl 3-phenylbicyclo[1.1.0]butane-1-carboxylate (**1a**, 67.8 mg, 0.36 mmol) according to the **GP** at 100 °C for 3 h. Purification by flash chromatography on silica gel using petroleum ether/EtOAc (20/1 to 5/1) afforded **cis-3am** as a white solid (93.6 mg, 76.0% yield, d.r. > 98:2).

**cis-3am**:  $R_f = 0.35$  (petroleum ether/EtOAc = 5/1).  **$^1\text{H NMR}$**  (400 MHz,  $\text{CDCl}_3$ ):  $\delta$  8.11 (d,  $J = 8.4$  Hz, 1H), 7.98 (d,  $J = 8.4$  Hz, 1H), 7.73 (s, 1H), 7.54-7.42 (m, 4H), 7.35-7.31 (m, 2H), 7.24-7.20 (m, 1H), 5.08 (s, 1H), 3.67 (s, 3H), 3.32-3.23 (m, 1H), 3.10-3.01 (m, 4H) ppm.  **$^{13}\text{C NMR}$**  (100 MHz,  $\text{CDCl}_3$ ):  $\delta$  174.9, 147.5, 144.6, 131.5, 130.0, 129.0, 128.3, 127.2, 127.1, 126.9, 126.4, 126.2, 126.1, 121.2, 113.7, 51.9, 45.0, 37.3, 33.3 ppm. **HRMS** (ESI)  $m/z$ :  $[\text{M}-\text{H}]^-$  calcd. for  $\text{C}_{22}\text{H}_{18}\text{BrO}_3$ : 409.0440; found: 409.0406.

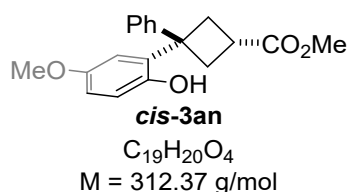**(cis)-Methyl-3-(2-hydroxy-5-methoxyphenyl)-3-phenylcyclobutane-1-carboxylate (cis-3an)**

**(cis-3an)**: Prepared from 4-methoxyphenol (**2n**, 37.2 mg, 0.3 mmol) and methyl 3-phenylbicyclo[1.1.0]butane-1-carboxylate (**1a**, 67.8 mg, 0.36 mmol) according to the **GP** at 100 °C for 3 h. Purification by flash chromatography on silica gel using petroleum ether/EtOAc (10/1 to 5/1) afforded **cis-3an** as a white solid (39.4 mg, 42% yield, d.r. = 75:25).

**cis-3an**:  $R_f = 0.30$  (petroleum ether/EtOAc = 5/1).  **$^1\text{H NMR}$**  (400 MHz,  $\text{CDCl}_3$ ):  $\delta$  7.49-7.47 (m, 2H), 7.32-7.25 (m, 2H), 7.20-7.16 (m, 1H), 6.83 (s, 1H), 6.60-6.54 (m, 2H), 4.65-4.45 (m, 1H), 3.77 (s, 3H), 3.65 (s, 3H), 3.20-3.13 (m, 1H), 3.03-2.96 (m, 4H) ppm.  **$^{13}\text{C NMR}$**  (100 MHz,  $\text{CDCl}_3$ ):  $\delta$  175.5, 153.5, 146.7, 145.4, 136.5, 128.4, 126.4, 126.2, 116.9, 113.3, 111.7, 55.7, 51.8, 45.5, 37.4, 33.3 ppm. **HRMS** (ESI)  $m/z$ :  $[\text{M}-\text{H}]^-$  calcd. for  $\text{C}_{19}\text{H}_{19}\text{O}_4$ : 311.1284; found: 311.1263.

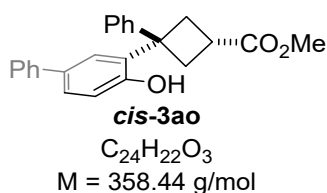

**(*cis*)-Methyl-3-(4-hydroxy-[1,1'-biphenyl]-3-yl)-3-phenylcyclobutane-1-carboxylate (*cis*-3ao):** Prepared from [1,1'-biphenyl]-4-ol (**2o**, 51.0 mg, 0.3 mmol) and methyl 3-phenylbicyclo[1.1.0]butane-1-carboxylate (**1a**, 67.8 mg, 0.36 mmol) according to the **GP** at 100 °C for 3 h. Purification by flash chromatography on silica gel using petroleum ether/EtOAc (20/1 to 10/1) afforded *cis*-3ao as a white solid (57.3 mg, 53% yield, d.r. = 70:30) together with trace amount of *trans*-3ao, which cannot be separated by chromatography.

*cis*-3ao:  $R_f$  = 0.50 (petroleum ether/EtOAc = 5/1).  **$^1H$  NMR** (400 MHz,  $CDCl_3$ ):  $\delta$  7.56-7.51 (m, 4H), 7.47 (s, 1H), 7.43-7.40 (m, 2H), 7.32-7.18 (m, 3H), 7.25 (d,  $J$  = 8.4 Hz, 1H), 7.20-7.16 (m, 1H), 6.67 (d,  $J$  = 8.4 Hz, 1H), 5.27 (broad s, 1H), 3.66 (s, 3H), 3.26-3.17 (m, 1H), 3.12-3.01 (m, 4H) ppm.  **$^{13}C$  NMR** (100 MHz,  $CDCl_3$ ): 175.8, 152.5, 145.5, 141.0, 135.6, 133.6, 128.7, 128.4, 126.8, 126.6, 126.5, 126.18, 126.15, 125.7, 116.5, 51.9, 45.5, 37.6, 33.5 ppm. **HRMS** (ESI)  $m/z$ :  $[M-H]^-$  calcd. for  $C_{24}H_{21}O_3$ : 357.1491; found: 357.1463.

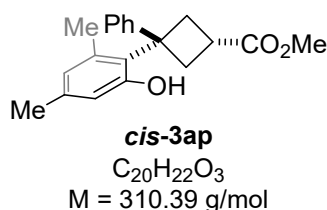

**(*cis*)-Methyl-3-(2-hydroxy-4,6-dimethylphenyl)-3-phenylcyclobutane-1-carboxylate**

**(*cis*-3ap):** Prepared from 3,5-dimethylphenol (**2m**, 36.7 mg, 0.3 mmol) and methyl 3-phenylbicyclo[1.1.0]butane-1-carboxylate (**1a**, 67.8 mg, 0.36 mmol) according to the **GP** at 100 °C for 3 h. Purification by flash chromatography on silica gel using petroleum ether/EtOAc (20/1 to 10/1) afforded *cis*-3ap as a white solid (56.0 mg, 60% yield, d.r. = 92:8).



*cis*-**3ap**:  $R_f = 0.50$  (petroleum ether/EtOAc = 5/1).  $^1\text{H NMR}$  (400 MHz,  $\text{CDCl}_3$ ):  $\delta$  7.57 (d,  $J = 7.2$  Hz, 2H), 7.29-7.26 (m, 2H), 7.18-7.14 (m, 1H), 6.44 (s, 1H), 6.39 (s, 1H), 5.61-5.54 (m, 1H), 3.67 (s, 3H), 3.20-3.13 (m, 1H), 3.11-3.01 (m, 4H), 2.16 (s, 3H), 2.08 (s, 3H) ppm.  $^{13}\text{C NMR}$  (100 MHz,  $\text{CDCl}_3$ ):  $\delta$  176.3, 153.3, 146.2, 137.1, 136.6, 130.6, 128.3, 126.3, 125.9, 124.5, 114.8, 51.8, 46.1, 39.8, 34.0, 20.62, 20.59 ppm. **HRMS** (ESI)  $m/z$ :  $[\text{M}-\text{H}]^-$  calcd. for  $\text{C}_{20}\text{H}_{21}\text{O}_3$ : 309.1491; found: 309.1470.

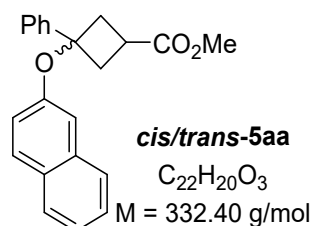

**(*cis/trans*)-Methyl-3-(naphthalen-2-yloxy)-3-phenylcyclobutane-1-carboxylate.**

**Major isomer:** white solid.  $R_f = 0.3$  (petroleum ether/EtOAc = 50/1).  $^1\text{H NMR}$  (400 MHz,  $\text{CDCl}_3$ ):  $\delta$  7.71-7.67 (m, 2H), 7.51-7.47 (m, 3H), 7.35-7.31 (m, 3H), 7.29-7.22 (m, 2H), 7.06 (dd,  $J = 8.8$  and 2.4 Hz, 1H), 6.66 (d,  $J = 2.4$  Hz, 1H), 3.72 (s, 3H), 3.49-3.40 (m, 1H), 2.97 (d,  $J = 8.4$  Hz, 4H) ppm.  $^{13}\text{C NMR}$  (100 MHz,  $\text{CDCl}_3$ ):  $\delta$  175.5, 153.0, 142.9, 133.9, 129.2, 128.7, 128.6, 127.4, 127.3, 126.8, 126.1, 125.1, 123.7, 120.1, 112.1, 81.2, 51.9, 37.5, 31.7 ppm. **HRMS** (ESI)  $m/z$ :  $[\text{M}+\text{Na}]^+$  calcd. for  $\text{C}_{22}\text{H}_{20}\text{O}_3\text{Na}$ : 355.1310; found: 355.1314. **Minor isomer:** white solid.  $R_f = 0.25$  (petroleum ether/EtOAc = 50/1).  $^1\text{H NMR}$  (400 MHz,  $\text{CDCl}_3$ ):  $\delta$  7.69-7.65 (m, 2H), 7.54 (d,  $J = 7.2$  Hz, 2H), 7.48 (d,  $J = 8.4$  Hz, 1H), 7.37-7.30 (m, 3H), 7.27-7.23 (m, 2H), 7.05 (d,  $J = 8.8$  Hz, 1H), 6.66 (s, 1H), 3.71 (s, 3H), 3.14-3.06 (m, 1H), 3.04-2.95 (m, 4H) ppm.  $^{13}\text{C NMR}$  (100 MHz,  $\text{CDCl}_3$ ):  $\delta$  174.7, 152.7, 142.6, 134.0, 129.2, 128.8, 128.7, 127.5, 127.4, 126.7, 126.0, 124.8, 123.6, 119.9, 111.1, 77.8, 52.0, 39.1, 29.9 ppm. **HRMS** (ESI)  $m/z$ :  $[\text{M}+\text{Na}]^+$  calcd. for  $\text{C}_{22}\text{H}_{20}\text{O}_3\text{Na}$ : 355.1310; found: 355.1314.

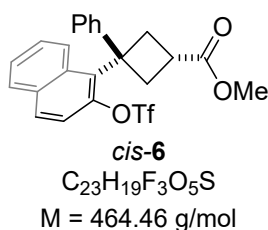

**(cis)-Methyl-3-phenyl-3-(2-(((trifluoromethyl)sulfonyl)oxy)naphthalen-1-yl)cyclobutane-1-carboxylate.** (*cis*-6):  $R_f = 0.75$  (petroleum ether/EtOAc = 10/1).  $^1\text{H NMR}$  (400 MHz,  $\text{CDCl}_3$ ):  $\delta$  7.89-7.83 (m, 2H), 7.73 (d,  $J = 8.4$  Hz, 1H), 7.51-7.42 (m, 5H), 7.33-7.30 (m, 2H), 7.25-7.22 (m, 1H), 3.65 (s, 1H), 3.58-3.48 (m, 1H), 3.35-3.16 (m, 4H) ppm.  $^{13}\text{C NMR}$  (100 MHz,  $\text{CDCl}_3$ ):  $\delta$  175.1, 145.5, 145.1, 136.3, 133.0, 132.0, 129.9, 129.0, 128.7, 126.9, 126.8, 126.5, 126.3, 126.1, 119.8, 118.3 (q,  $J = 318$  Hz), 51.9, 45.9, 41.9, 41.1, 34.1 ppm.  $^{19}\text{F NMR}$  (376 MHz,  $\text{CDCl}_3$ ):  $\delta$  -74.32 ppm. **HRMS** (ESI)  $m/z$ :  $[\text{M}+\text{Na}]^+$  calcd. for  $\text{C}_{23}\text{H}_{19}\text{F}_3\text{O}_5\text{SNa}$ : 487.0803; found: 487.0769.

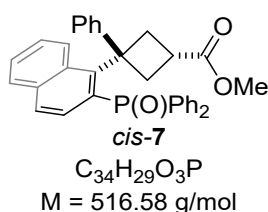

**(cis)-Methyl-3-(2-(diphenylphosphoryl)naphthalen-1-yl)-3-phenylcyclobutane-1-carboxylate.** (*cis*-7):  $R_f = 0.2$  (petroleum ether/EtOAc = 2/1).  $^1\text{H NMR}$  (400 MHz,  $\text{CDCl}_3$ ):  $\delta$  7.93-7.88 (m, 2H), 7.78 (d,  $J = 8.0$  Hz, 1H), 7.64-7.52 (m, 7H), 7.47-7.27 (m, 9H), 7.25-7.21 (m, 2H), 3.43-3.30 (m, 6H), 3.26-3.19 (m, 1H), 2.89-2.84 (m, 1H) ppm.  $^{13}\text{C NMR}$  (100 MHz,  $\text{CDCl}_3$ ):  $\delta$  175.4, 155.4 (d,  $J = 5.4$  Hz), 148.1, 137.2 (d,  $J = 5.4$  Hz), 135.2 (d,  $J = 2.5$  Hz), 133.5 (d,  $J = 98.9$  Hz), 132.1, 131.97 (d,  $J = 11.7$  Hz), 131.96, 131.8, 131.7, 131.1 (d,  $J = 2.7$  Hz), 130.1 (d,  $J = 14.2$  Hz), 128.6 ((d,  $J = 12.0$  Hz), 128.5, 128.3, 128.2, 127.7, 127.29, 127.26, 126.5, 126.3, 126.0, 125.9, 125.6 (d,  $J = 13.5$  Hz), 51.4, 49.0 (d,  $J = 3.6$  Hz), 44.1, 43.6, 33.3 ppm.  $^{31}\text{P NMR}$  (162 MHz,  $\text{CDCl}_3$ )  $\delta$  32.77 ppm. **HRMS** (ESI)  $m/z$ :  $[\text{M}+\text{H}]^+$  calcd. for  $\text{C}_{34}\text{H}_{30}\text{O}_3\text{P}$ : 517.1932; found: 517.1896.

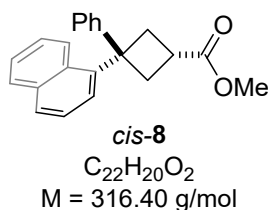

**(cis)-Methyl-3-(naphthalen-1-yl)-3-phenylcyclobutane-1-carboxylate.** (*cis*-8):  $R_f = 0.75$  (petroleum ether/EtOAc = 10/1).  $^1\text{H NMR}$  (400 MHz,  $\text{CDCl}_3$ ):  $\delta$  7.79 (d,  $J = 8.0$  Hz, 1H), 7.72 (d,  $J = 8.0$  Hz, 1H), 7.60-7.55 (m, 2H), 7.52-7.45 (m, 3H), 7.36-7.33 (m, 1H), 7.29-7.24 (m, 3H), 7.15-7.12 (m, 1H), 3.64 (s, 3H), 3.47-3.38 (m, 1H), 3.18-3.15 (m, 4H) ppm.  $^{13}\text{C NMR}$  (100 MHz,  $\text{CDCl}_3$ ):  $\delta$  175.1, 146.5, 144.8, 134.4, 130.3, 128.8, 128.5, 127.3, 126.01, 125.95, 125.4, 125.2, 125.0, 124.3, 51.7, 47.5, 38.8, 33.1 ppm. **HRMS** (ESI)  $m/z$ :  $[\text{M}+\text{Na}]^+$  calcd. for  $\text{C}_{22}\text{H}_{20}\text{O}_2\text{Na}$ : 339.1361; found: 339.1336.

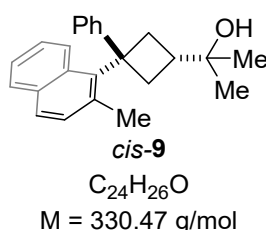

**(cis)-2-(3-(2-Methylnaphthalen-1-yl)-3-phenylcyclobutyl)propan-2-ol.** (*cis*-9):  $R_f = 0.30$  (petroleum ether/EtOAc = 10/1).  $^1\text{H NMR}$  (400 MHz,  $\text{CDCl}_3$ ):  $\delta$  7.78 (d,  $J = 8.0$  Hz, 1H), 7.67-7.62 (m, 2H), 7.48 (d,  $J = 8.0$  Hz, 2H), 7.36-7.32 (m, 1H), 7.31-7.23 (m, 4H), 7.21-7.17 (m, 1H), 3.06-3.00 (m, 1H), 2.88-2.66 (m, 4H), 2.35 (s, 3H), 1.10 (s, 3H), 1.08 (s, 3H) ppm.  $^{13}\text{C NMR}$  (100 MHz,  $\text{CDCl}_3$ ):  $\delta$  147.8, 143.6, 134.0, 133.0, 131.9, 130.3, 128.5, 126.6, 126.3, 126.2, 125.9, 124.7, 124.1, 70.4, 46.4, 40.7, 40.4, 39.6, 26.8, 26.7, 22.4 ppm. **HRMS** (ESI)  $m/z$ :  $[\text{M}+\text{Na}]^+$  calcd. for  $\text{C}_{24}\text{H}_{26}\text{ONa}$ : 353.1882; found: 353.1880.

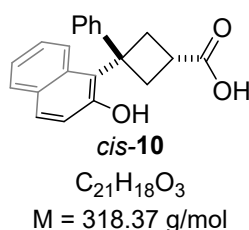

**(cis)-3-(2-Hydroxynaphthalen-1-yl)-3-phenylcyclobutane-1-carboxylic acid.** (*cis*-10):  $R_f = 0.20$  (DCM/MeOH = 50/1).  $^1\text{H NMR}$  (400 MHz,  $\text{CDCl}_3$ ):  $\delta$  7.69 (d,  $J = 8.0$  Hz, 1H), 7.63-7.59 (m, 3H), 7.55-7.52 (m, 1H), 7.33-7.22 (m, 4H), 7.17-7.14 (m, 1H), 6.90-6.87 (m, 1H), 3.37-3.16 (m, 5H) ppm.  $^{13}\text{C NMR}$  (100 MHz,  $\text{CDCl}_3$ ):  $\delta$  180.9, 150.2, 146.2, 132.1, 129.8, 128.8, 128.7, 128.6, 126.6, 126.3, 126.2, 125.9, 124.5, 122.9,

118.7, 45.9, 40.3, 34.2 ppm. **HRMS** (ESI)  $m/z$ :  $[M-H]^-$  calcd. for  $C_{21}H_{17}O_3$ : 317.3642; found: 317.3628.

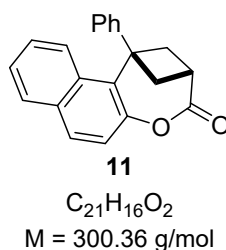

**1-Phenyl-2,3-dihydro-1,3-methanonaphtho[2,1-b]oxepin-4(1H)-one (11):**  $R_f$  = 0.60 (petroleum ether/EtOAc = 10/1).  **$^1H$  NMR** (400 MHz,  $CDCl_3$ ):  $\delta$  7.73-7.69 (m, 2H), 7.42 (d,  $J$  = 8.8 Hz, 1H), 7.37-7.34 (m, 2H), 7.30-7.26 (m, 1H), 7.21-7.17 (m, 3H), 6.90 (d,  $J$  = 9.2 Hz, 1H), 6.86-6.82 (m, 1H), 3.60 (t,  $J$  = 8.4 Hz, 1H), 3.19-3.12 (m, 2H), 2.72 (d,  $J$  = 11.2 Hz, 2H) ppm.  **$^{13}C$  NMR** (100 MHz,  $CDCl_3$ ):  $\delta$  172.8, 150.4, 149.3, 131.9, 131.6, 129.4, 129.1, 128.2, 127.5, 126.6, 126.4, 125.6, 124.6, 124.1, 121.1, 49.1, 37.1, 34.3 ppm. **HRMS** (ESI)  $m/z$ :  $[M+Na]^+$  calcd. for  $C_{21}H_{16}O_2Na$ : 323.1048; found: 323.1025.

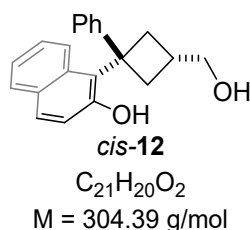

**(cis)-1-(3-(Hydroxymethyl)-1-phenylcyclobutyl)naphthalen-2-ol. (cis-12):**  $R_f$  = 0.30 (petroleum ether/EtOAc = 2/1).  **$^1H$  NMR** (400 MHz, Methanol- $d_4$ ):  $\delta$  7.70-7.65 (m, 4H), 7.56 (d,  $J$  = 8.4 Hz, 1H), 7.24-7.20 (m, 3H), 7.16-7.12 (m, 1H), 7.11-7.06 (m, 2H), 3.48 (d,  $J$  = 5.2 Hz, 2H), 3.11 (s, 2H), 2.62-2.56 (m, 3H) ppm.  **$^{13}C$  NMR** (100 MHz, Methanol- $d_4$ ):  $\delta$  153.2, 149.8, 133.9, 130.8, 129.5, 129.1, 129.0, 128.8, 127.7, 126.5, 126.0, 125.9, 123.1, 120.0, 68.1, 47.6, 42.1, 34.1 ppm. **HRMS** (ESI)  $m/z$ :  $[M-H]^-$  calcd. for  $C_{21}H_{19}O_2$ : 303.1385; found: 303.1365.

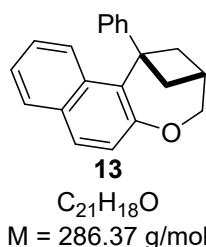

**1-Phenyl-1,2,3,4-tetrahydro-1,3-methanonaphtho[2,1-b]oxepine (13):**  $R_f = 0.35$  (petroleum ether/EtOAc = 100/1).  **$^1H$  NMR** (400 MHz,  $CDCl_3$ ):  $\delta$  7.66 (d,  $J = 8.0$  Hz, 1H), 7.60 (d,  $J = 8.4$  Hz, 1H), 7.27-7.21 (m, 3H), 7.18-7.16 (m, 1H), 7.12-7.10 (m, 4H), 6.87-6.84 (m, 1H), 4.34 (d,  $J = 4.0$  Hz, 2H), 2.86-2.77 (m, 3H), 2.68-2.66 (m, 2H) ppm.  **$^{13}C$  NMR** (100 MHz,  $CDCl_3$ ):  $\delta$  157.3, 150.8, 132.5, 131.4, 129.4, 128.6, 128.03, 128.01, 126.5, 125.2, 125.0, 124.0, 123.0, 122.3, 75.5, 52.2, 38.4, 31.6 ppm. **HRMS** (ESI)  $m/z$ :  $[M+H]^+$  calcd. for  $C_{21}H_{19}O$ : 287.1436; found: 287.1435.

## 9 Crystal Structure of *cis*-3ab

Note: The thermal ellipsoids are 50% probability level. The crystals are grown by slow solvent (EtOAc/*n*-Hexane) evaporation at room temperature. CCDC number of *cis*-**3ab** is 2262933.

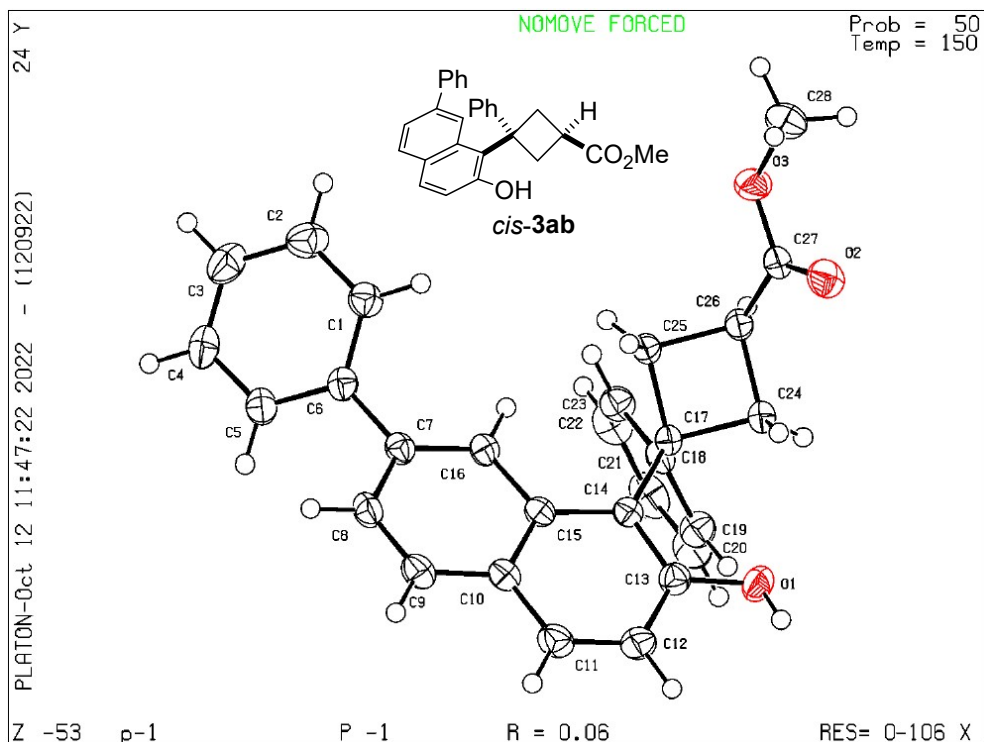

### Datablock: p-1

Bond precision: C-C = 0.0028 Å Wavelength=0.71073

Cell: a=9.7676(15) b=10.6234(16) c=12.9739(16)  
alpha=74.896(6) beta=74.919(6) gamma=77.645(6)

Temperature: 150 K

|                        | Calculated             | Reported     |
|------------------------|------------------------|--------------|
| Volume                 | 1239.4(3)              | 1239.4(3)    |
| Space group            | P -1                   | P -1         |
| Hall group             | -P 1                   | -P 1         |
| Moiety formula         | C28 H24 O3 [+ solvent] | C28 H24 O3   |
| Sum formula            | C28 H24 O3 [+ solvent] | C28 H24 O3   |
| Mr                     | 408.47                 | 408.47       |
| Dx, g cm <sup>-3</sup> | 1.094                  | 1.094        |
| Z                      | 2                      | 2            |
| Mu (mm <sup>-1</sup> ) | 0.070                  | 0.070        |
| F000                   | 432.0                  | 432.0        |
| F000'                  | 432.20                 |              |
| h, k, lmax             | 13, 14, 17             | 13, 14, 17   |
| Nref                   | 6165                   | 6151         |
| Tmin, Tmax             | 0.983, 0.986           | 0.679, 0.746 |
| Tmin'                  | 0.983                  |              |

Correction method= # Reported T Limits: Tmin=0.679 Tmax=0.746  
AbsCorr = ?

Data completeness= 0.998 Theta(max)= 28.304

R(reflections)= 0.0585( 4807) wR2(reflections)=  
0.1861( 6151)

S = 1.064 Npar= 282

## 10 NMR Spectra

### $^1\text{H}$ and $^{13}\text{C}$ NMR Spectra for Compound *cis*-3aa:

$^1\text{H}$  NMR (400 MHz,  $\text{CDCl}_3$ )

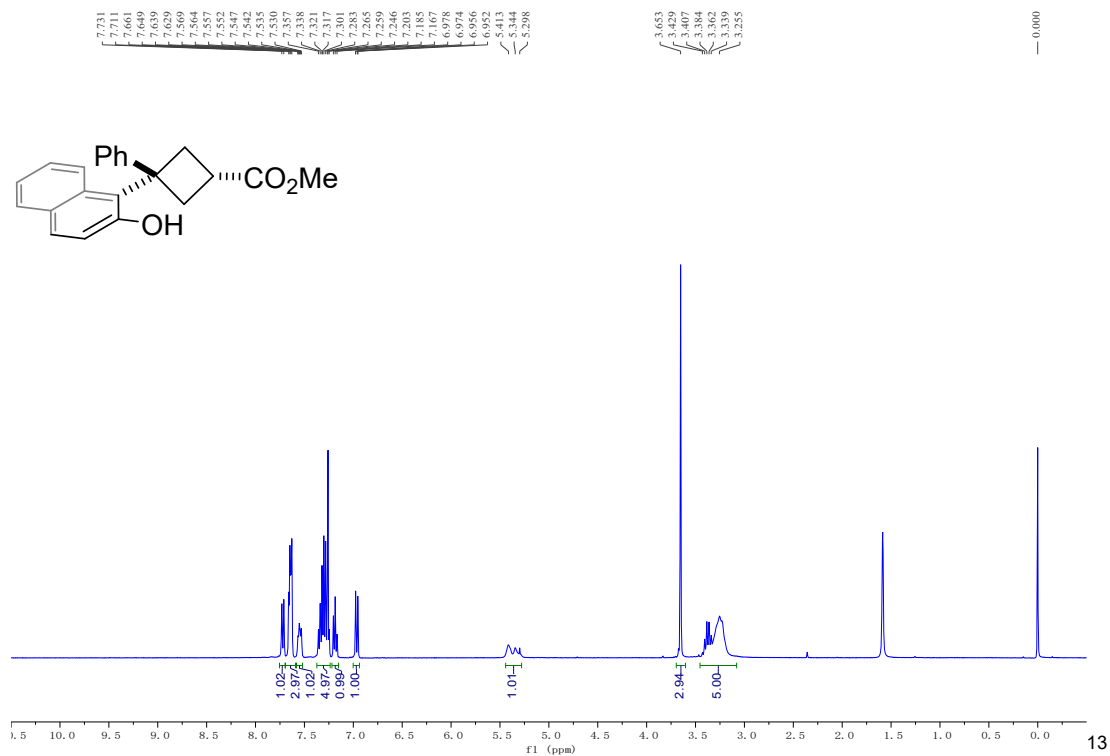

$^{13}\text{C}$  NMR (100 MHz,  $\text{CDCl}_3$ )

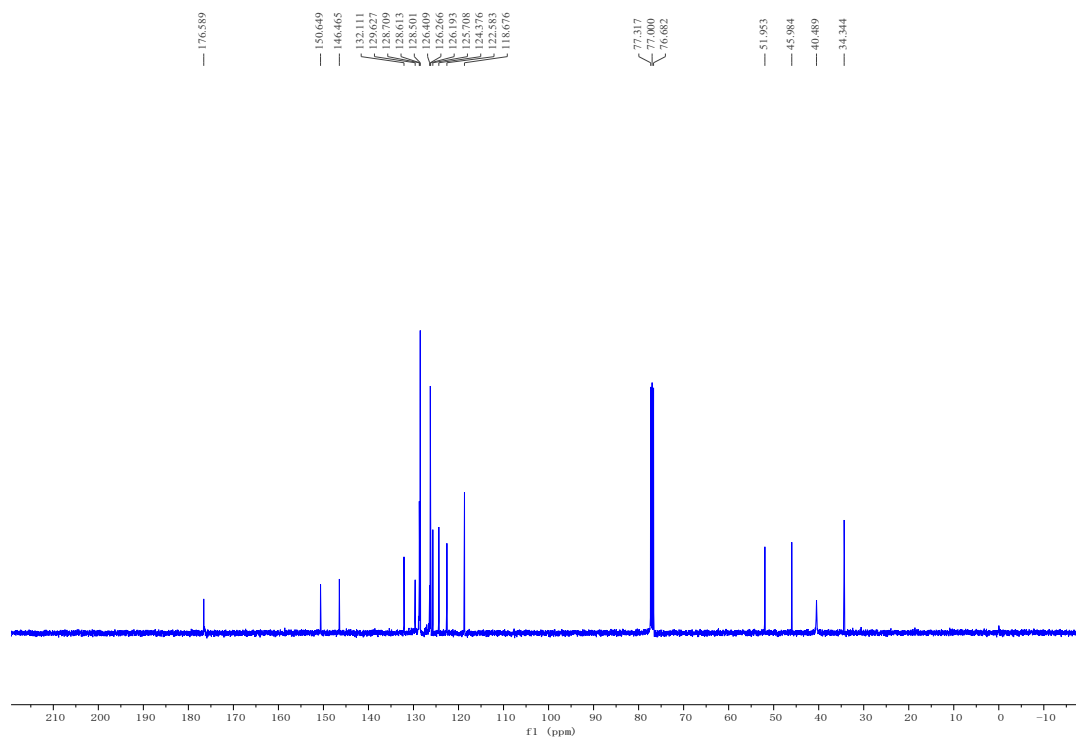

**$^1\text{H}$  and  $^{13}\text{C}$  NMR Spectra for Compound *cis*-3ba:** $^1\text{H}$  NMR (400 MHz,  $\text{CDCl}_3$ )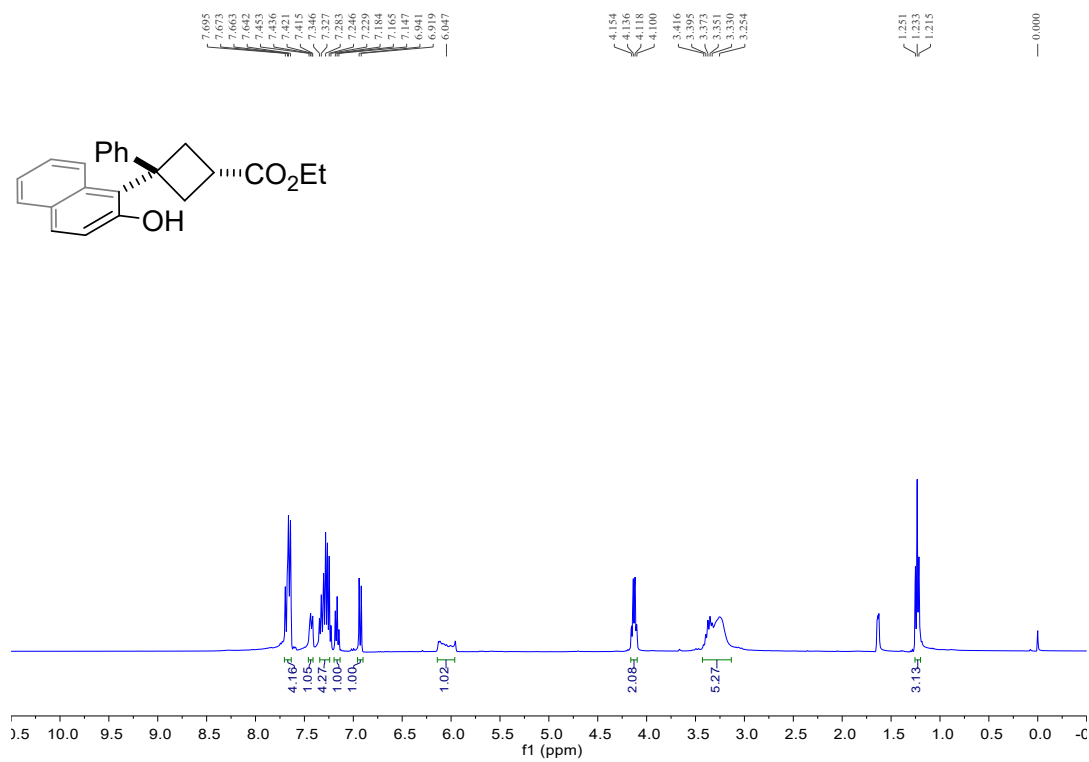



$^{13}\text{C}$  NMR (100 MHz,  $\text{CDCl}_3$ )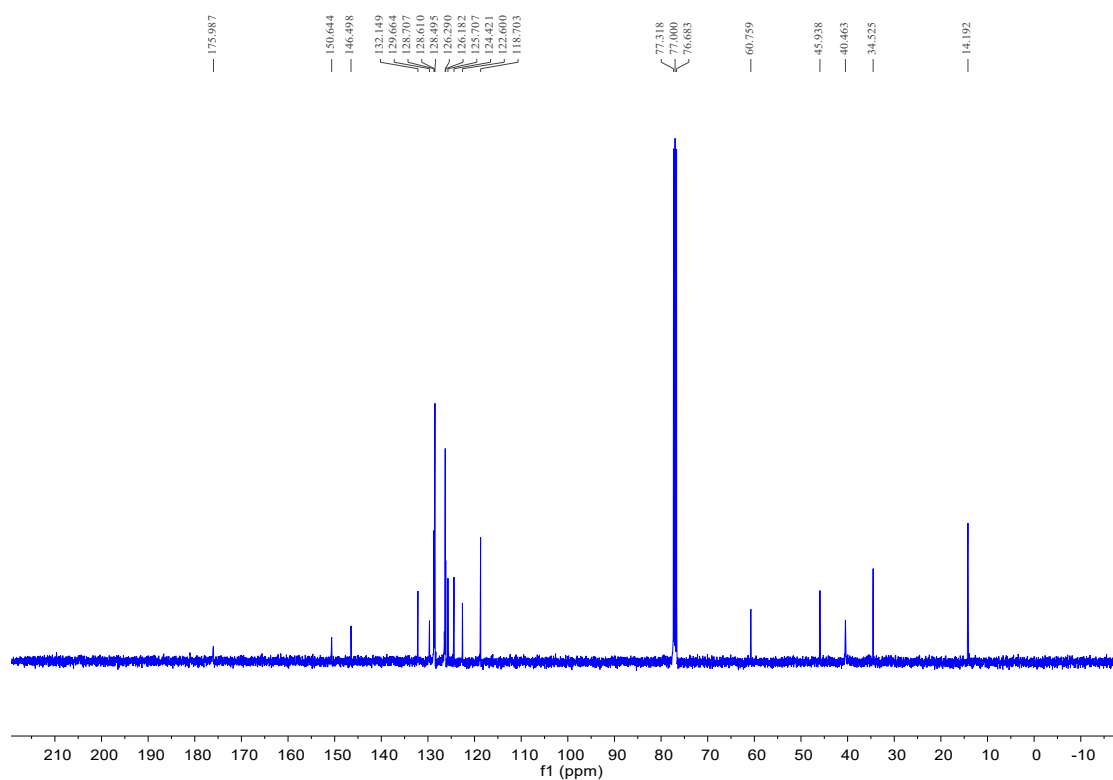 $^1\text{H}$  and  $^{13}\text{C}$  NMR Spectra for Compound *cis*-3ca: $^1\text{H}$  NMR (400 MHz,  $\text{CDCl}_3$ )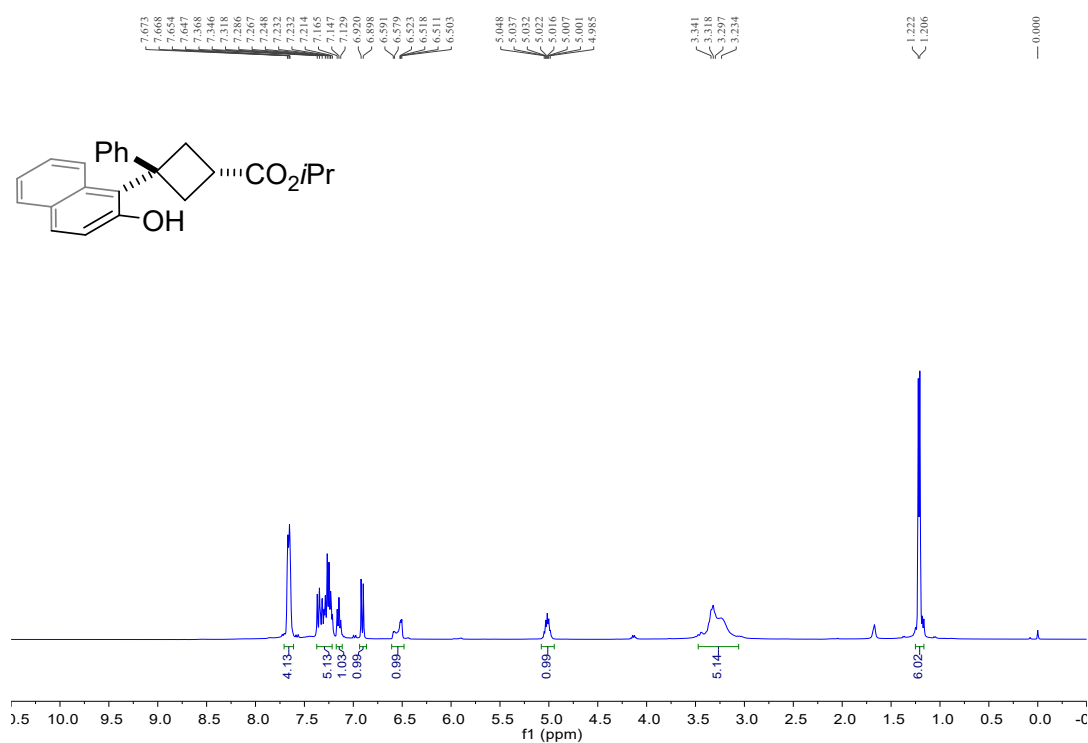

$^{13}\text{C}$  NMR (100 MHz,  $\text{CDCl}_3$ )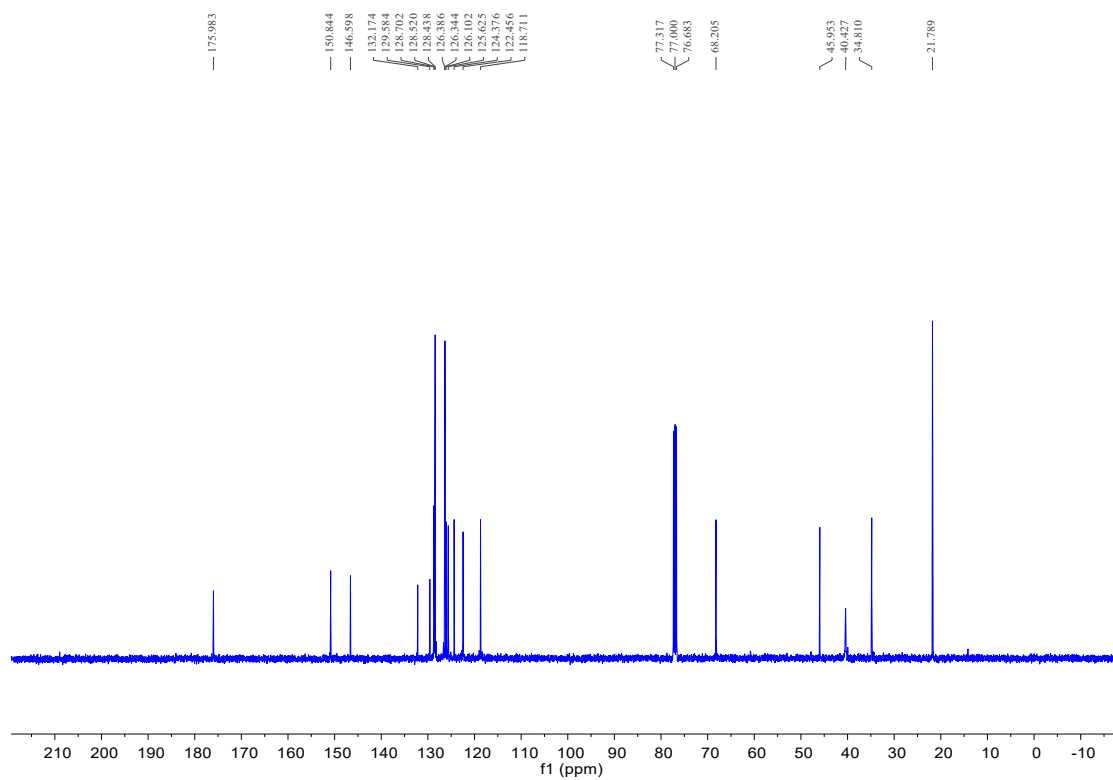 $^1\text{H}$  and  $^{13}\text{C}$  NMR Spectra for Compound *cis*-3da: $^1\text{H}$  NMR (400 MHz,  $\text{CDCl}_3$ )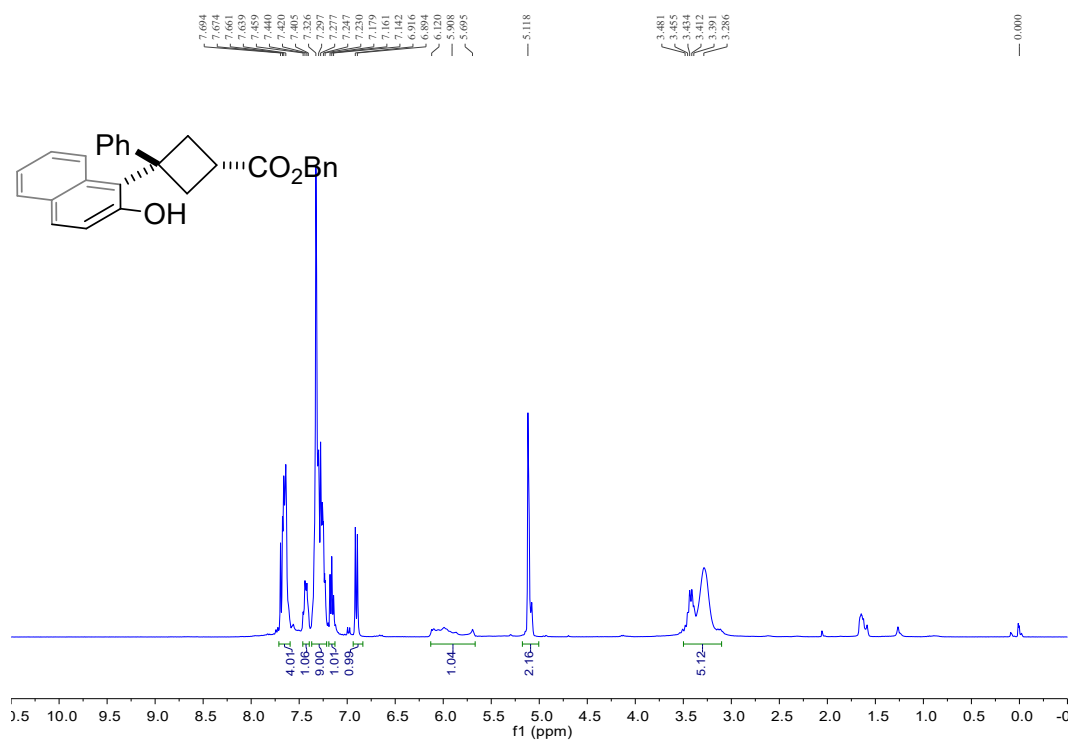

$^{13}\text{C}$  NMR (100 MHz,  $\text{CDCl}_3$ )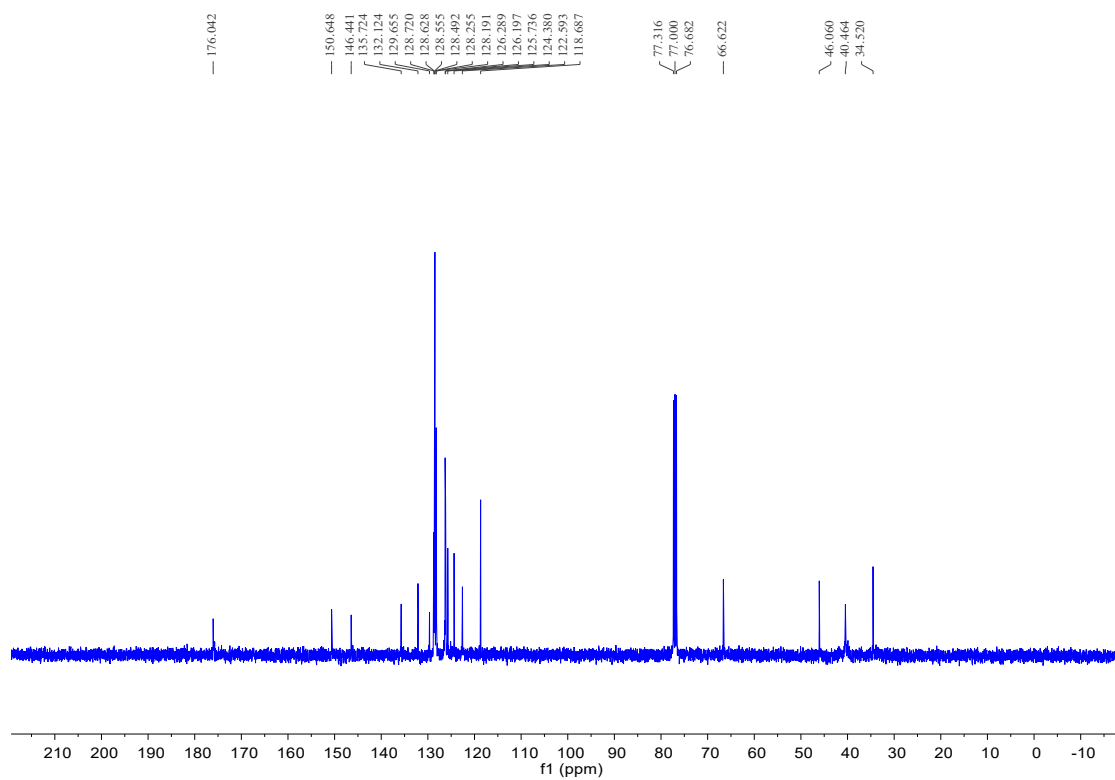 $^1\text{H}$  and  $^{13}\text{C}$  NMR Spectra for Compound *cis*-3ea: $^1\text{H}$  NMR (400 MHz,  $\text{CDCl}_3$ )

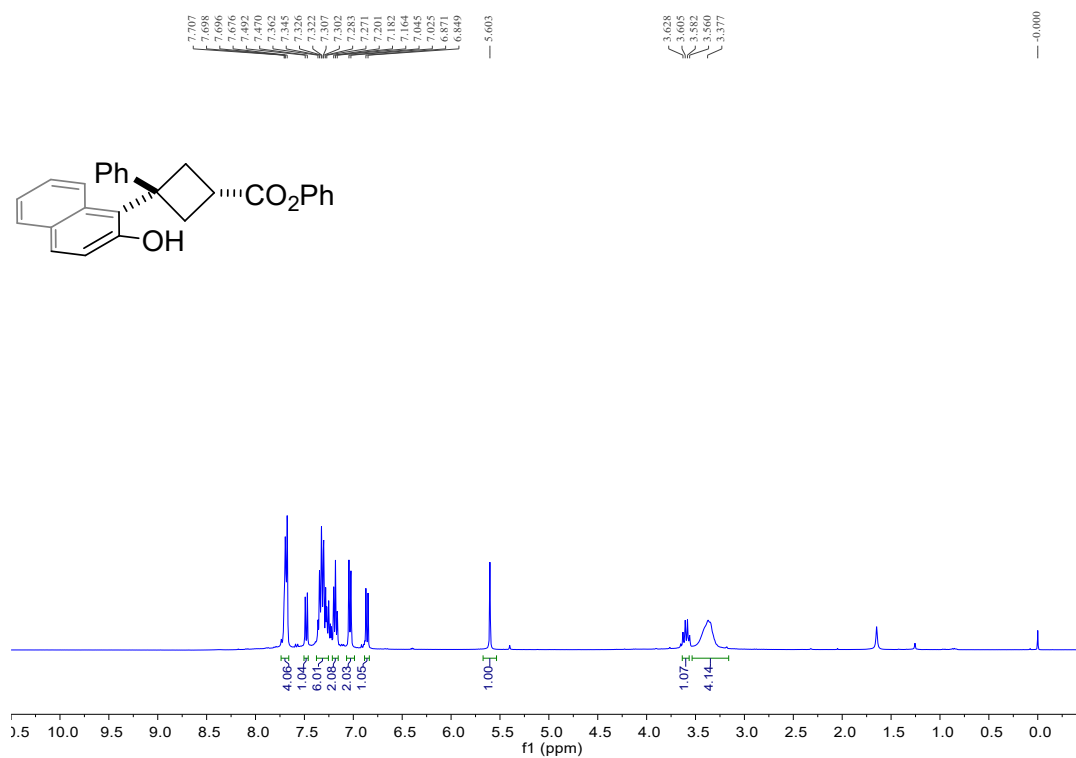<sup>13</sup>C NMR (100 MHz, CDCl<sub>3</sub>)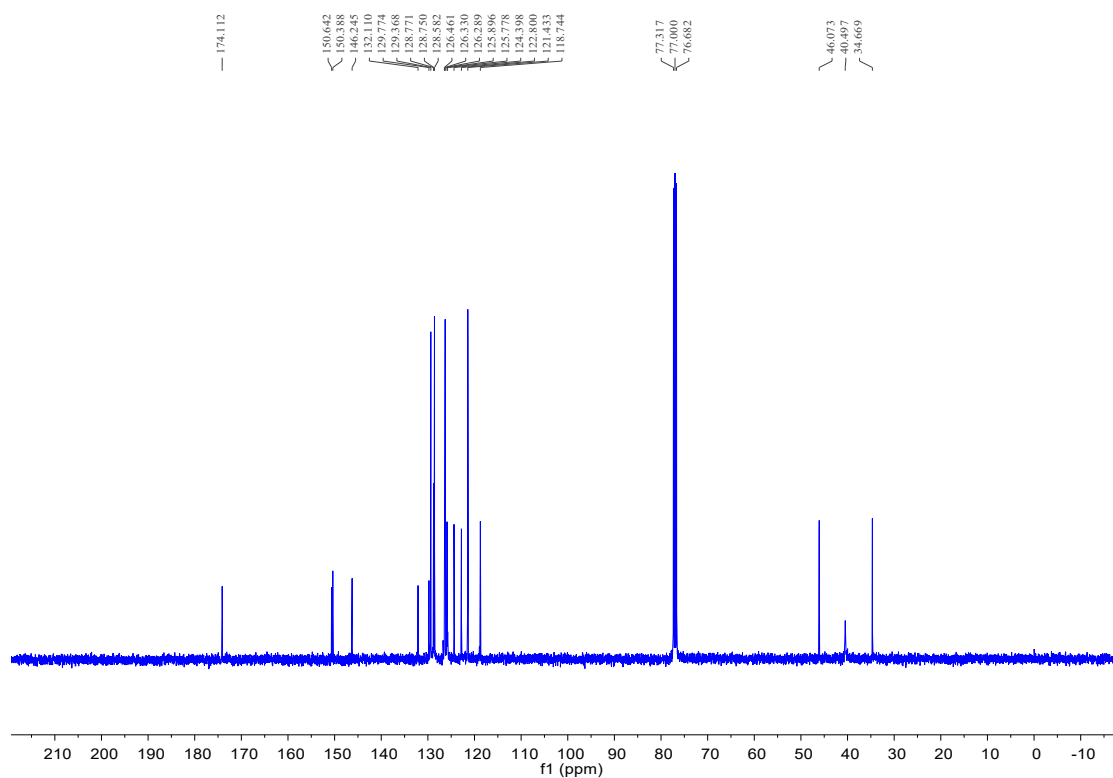<sup>1</sup>H and <sup>13</sup>C NMR Spectra for Compound *cis*-3fa<sup>1</sup>H NMR (400 MHz, CDCl<sub>3</sub>)

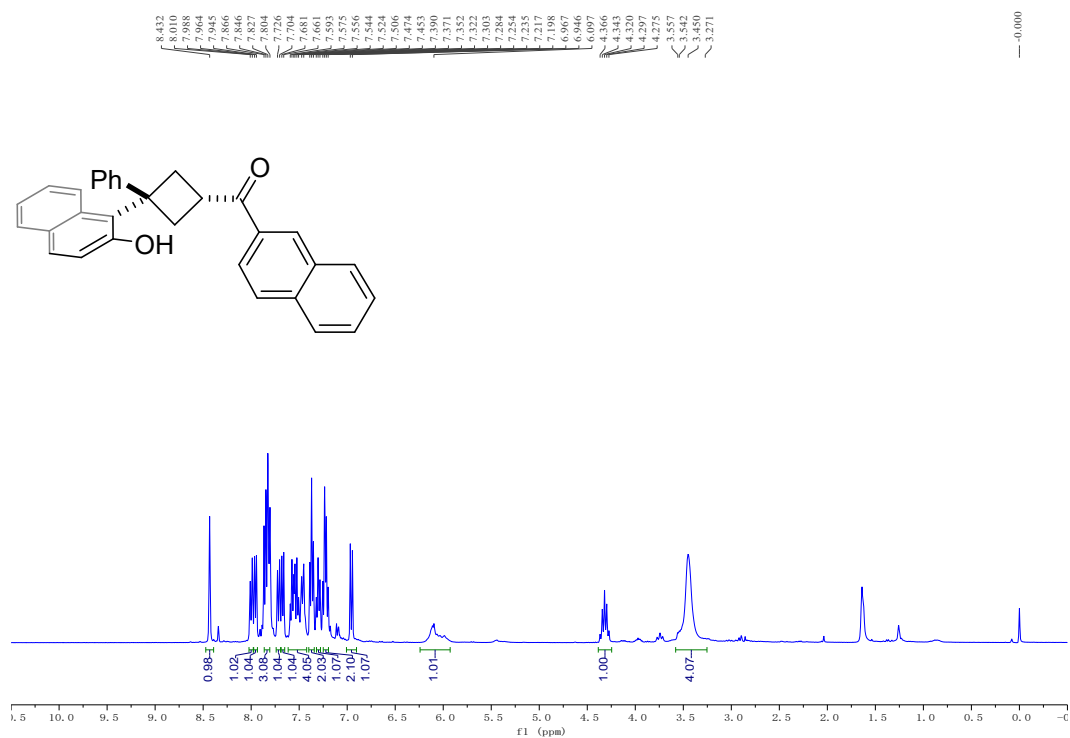 $^{13}\text{C}$  NMR (100 MHz,  $\text{CDCl}_3$ )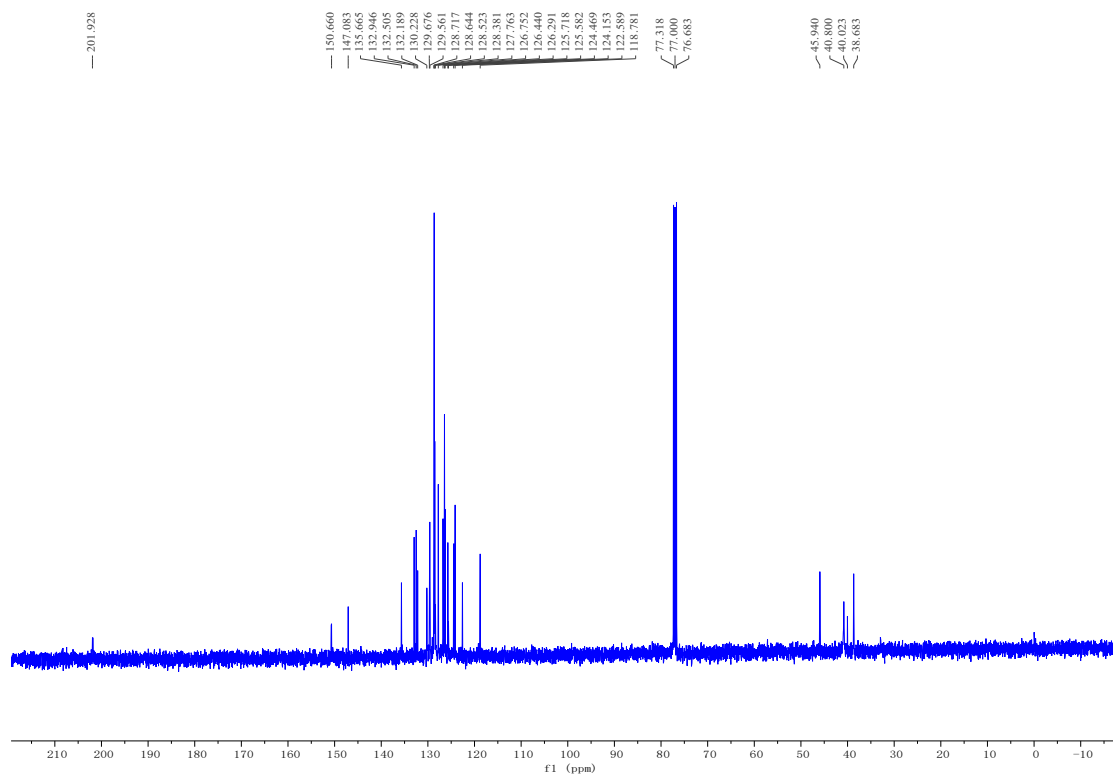 $^1\text{H}$  and  $^{13}\text{C}$  NMR Spectra for Compound *cis*-3ga

$^1\text{H}$  NMR (400 MHz,  $\text{CDCl}_3$ )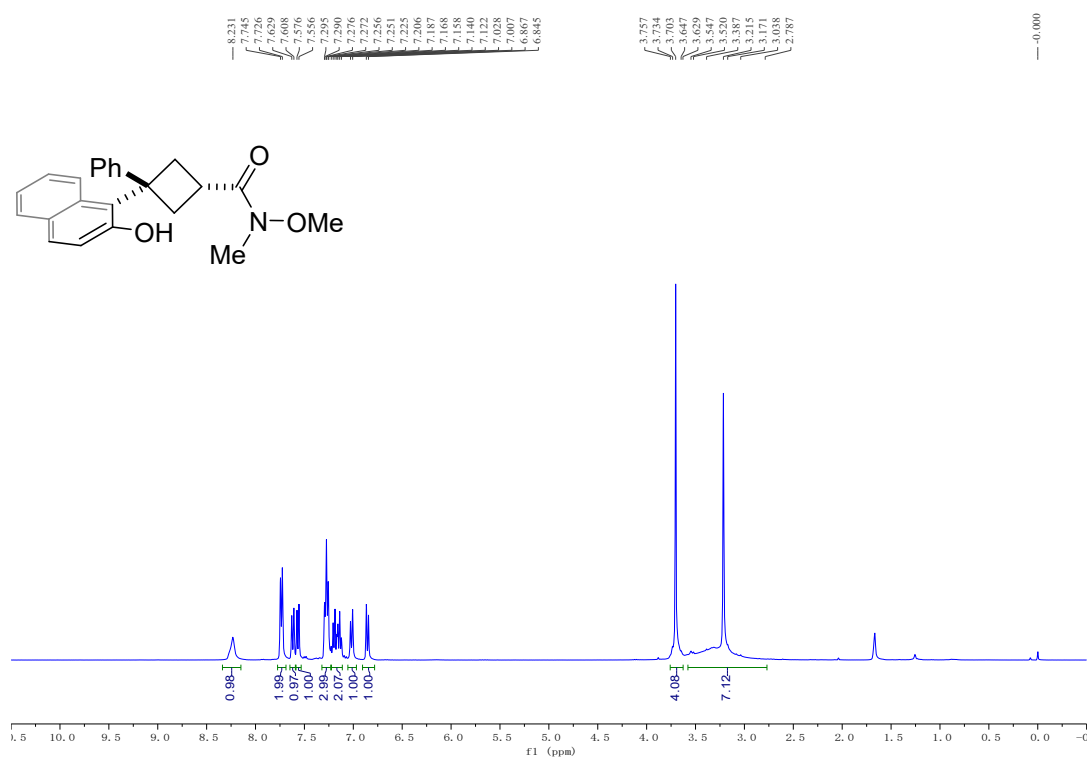 $^{13}\text{C}$  NMR (100 MHz,  $\text{CDCl}_3$ )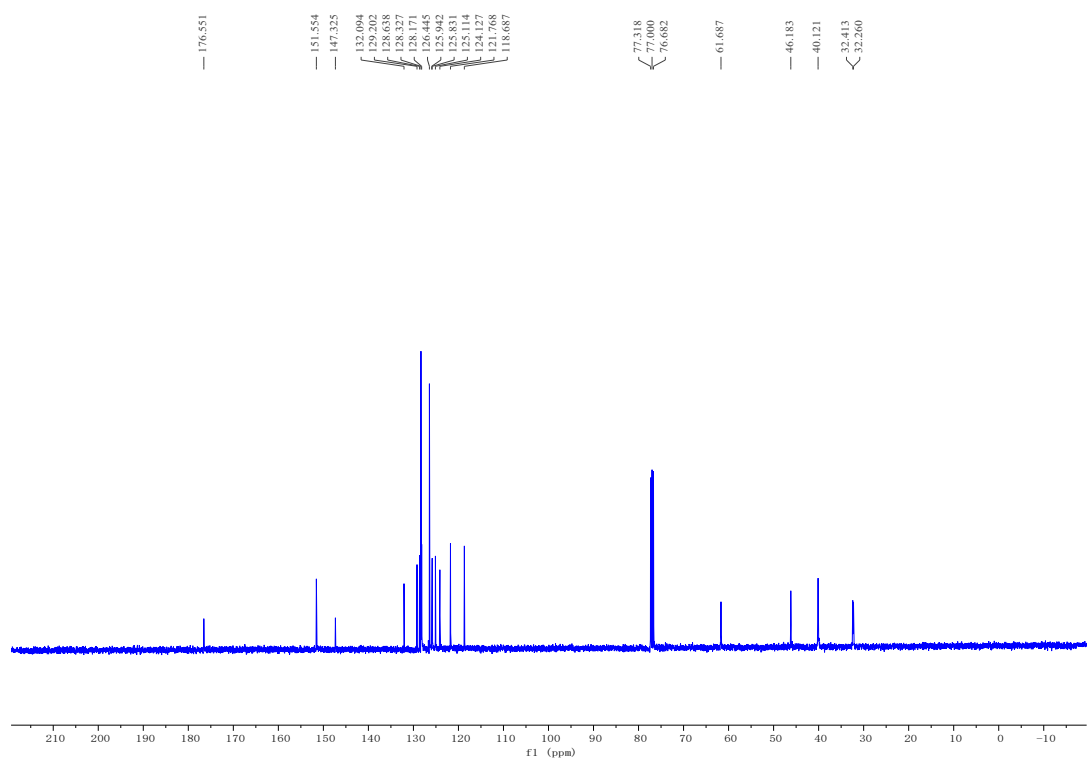 $^1\text{H}$  and  $^{13}\text{C}$  NMR Spectra for Compound 3ha

$^1\text{H}$  NMR (400 MHz,  $\text{CDCl}_3$ )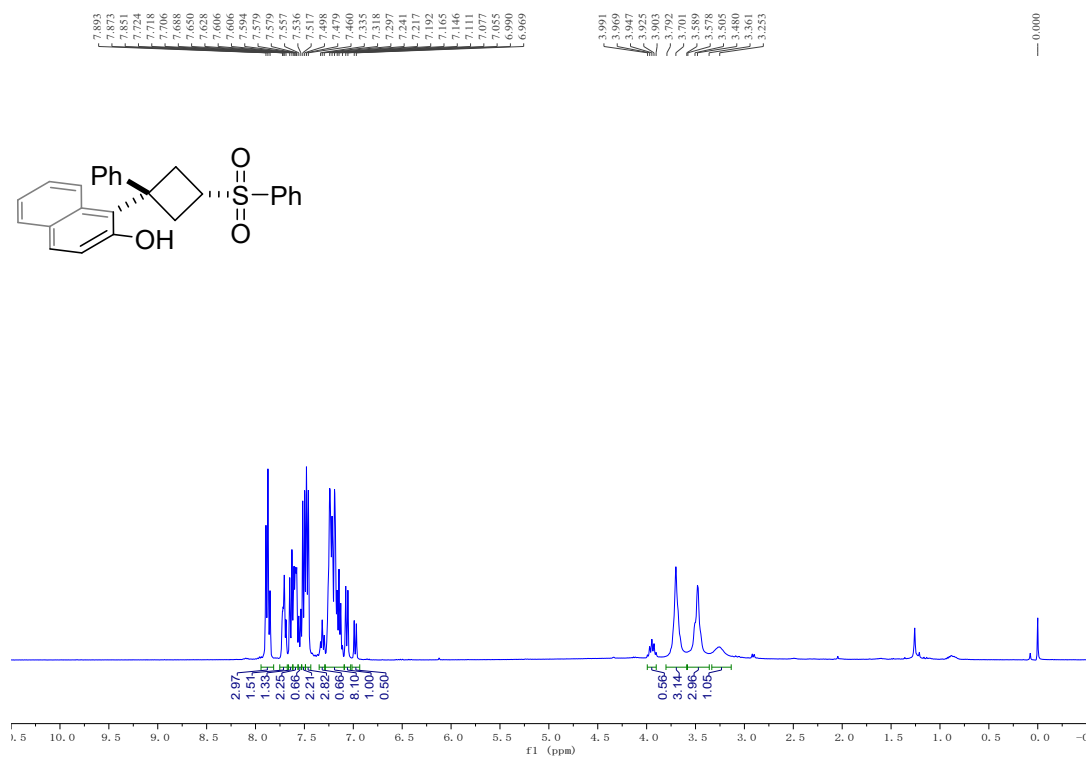 $^{13}\text{C}$  NMR (100 MHz,  $\text{CDCl}_3$ )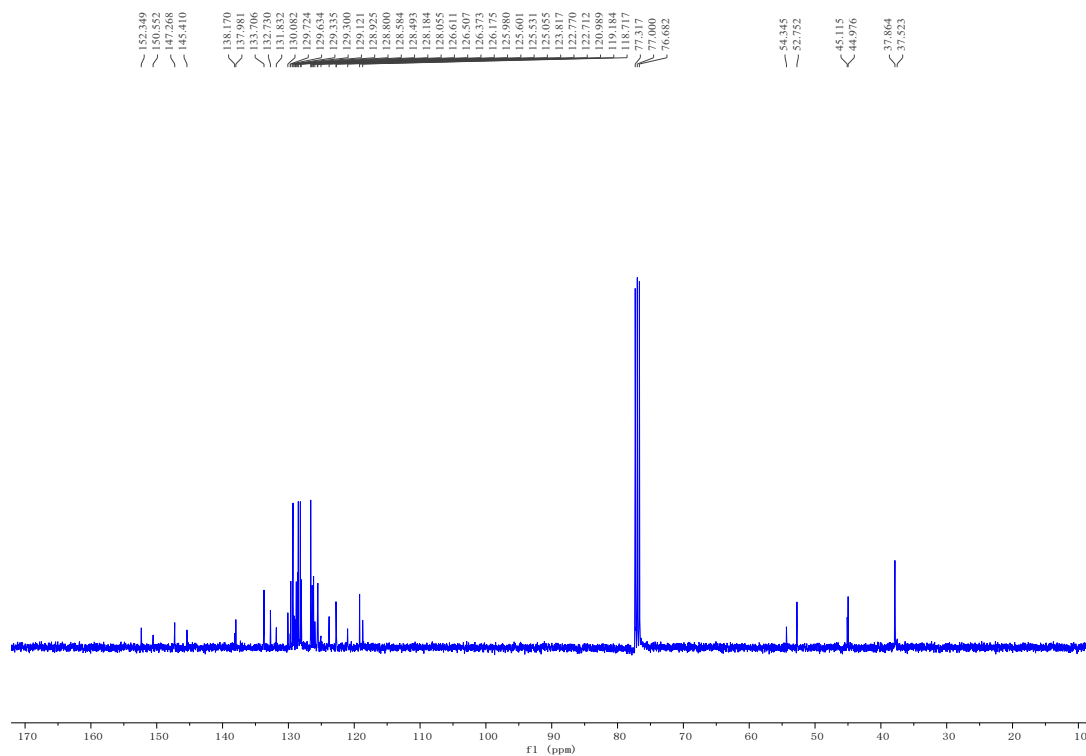 $^1\text{H}$  and  $^{13}\text{C}$  NMR Spectra for Compound *cis*-3ia:

$^1\text{H}$  NMR (400 MHz,  $\text{CDCl}_3$ )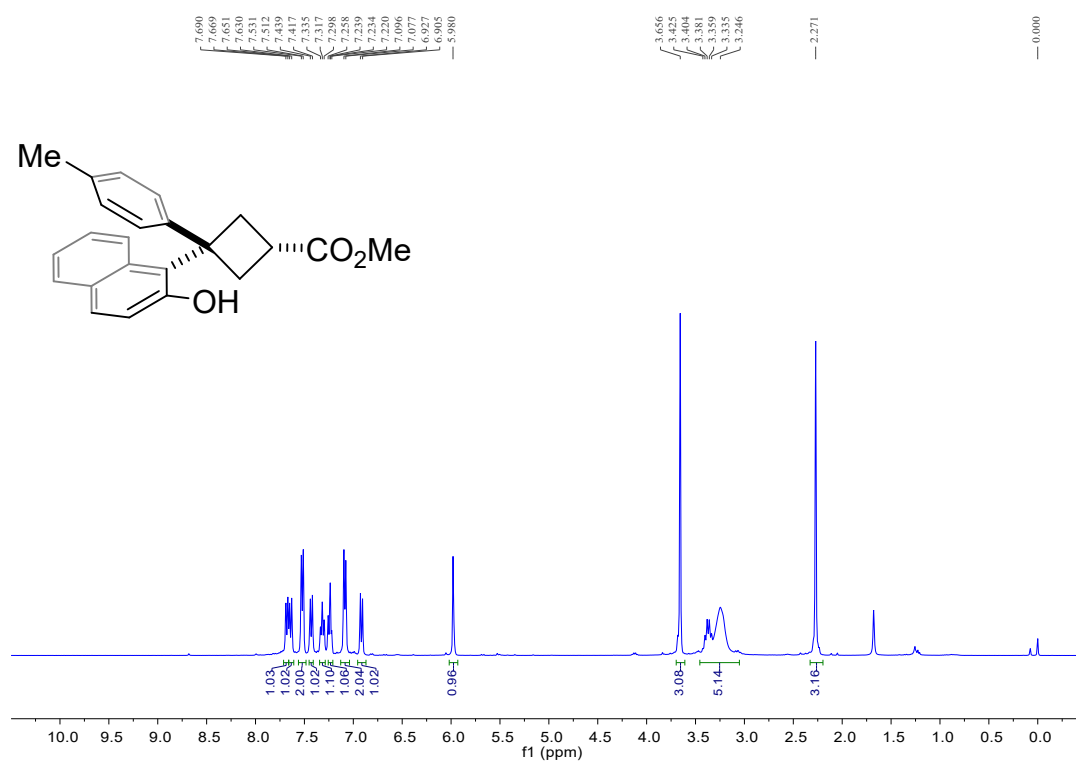 $^{13}\text{C}$  NMR (100 MHz,  $\text{CDCl}_3$ )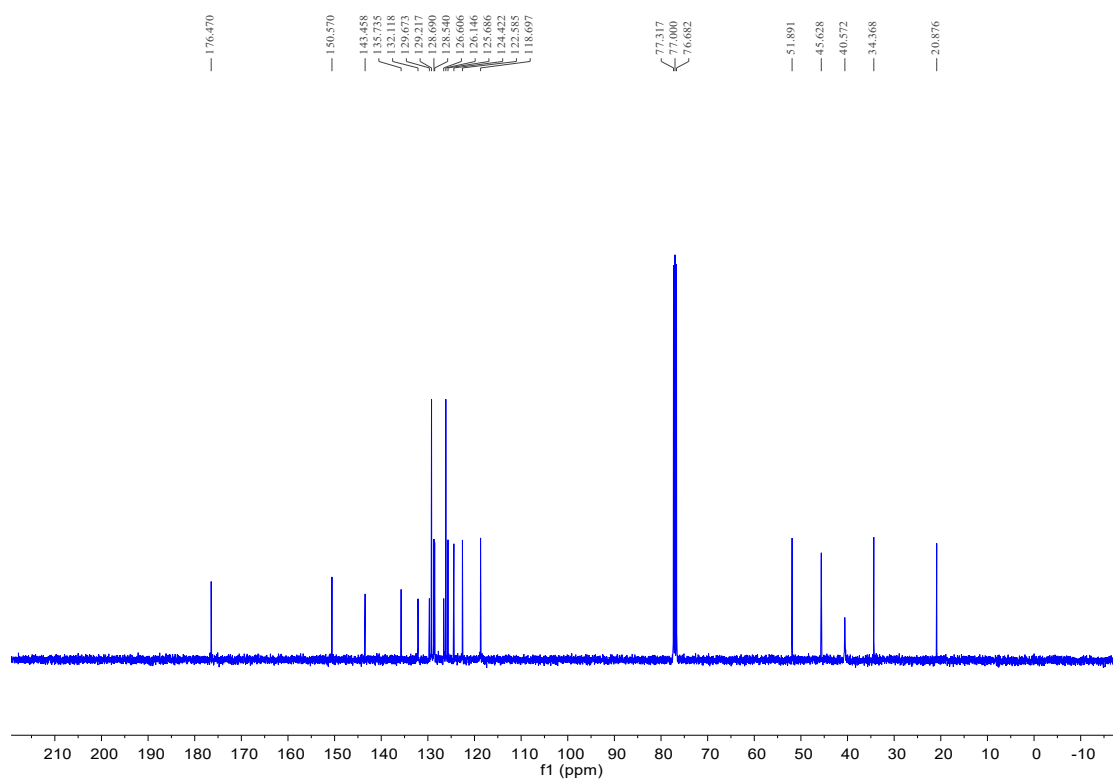 $^1\text{H}$ ,  $^{13}\text{C}$  NMR and  $^{19}\text{F}$  NMR Spectra for Compound *cis*-3ja:



$^1\text{H}$  NMR (400 MHz,  $\text{CDCl}_3$ )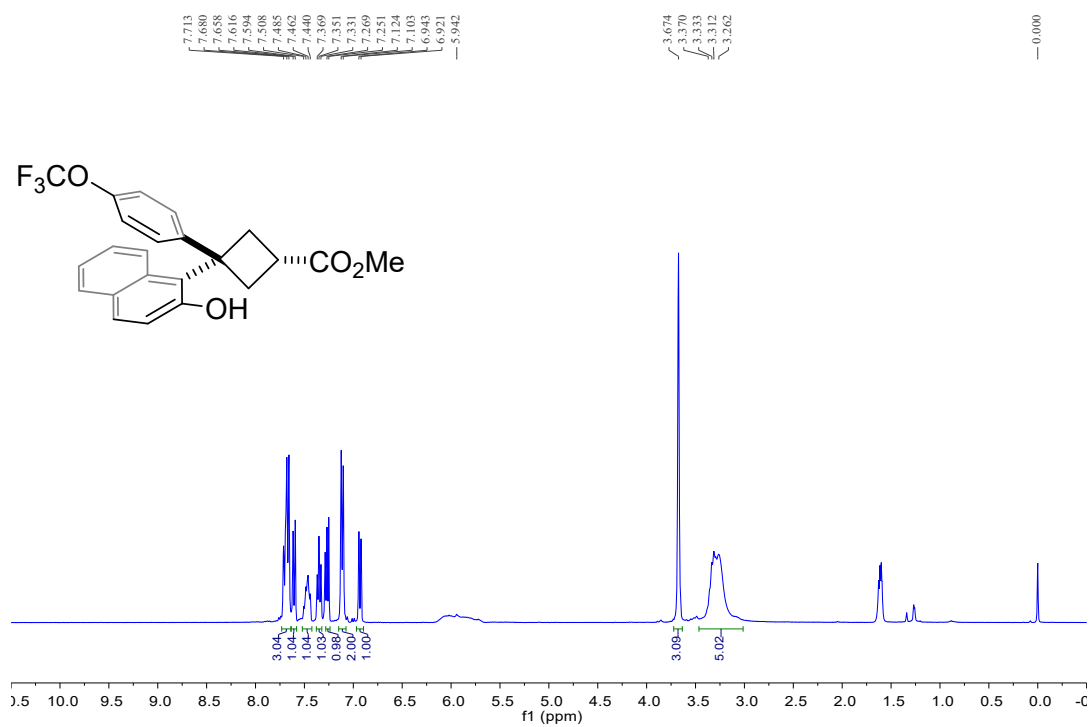 $^{13}\text{C}$  NMR (100 MHz,  $\text{CDCl}_3$ )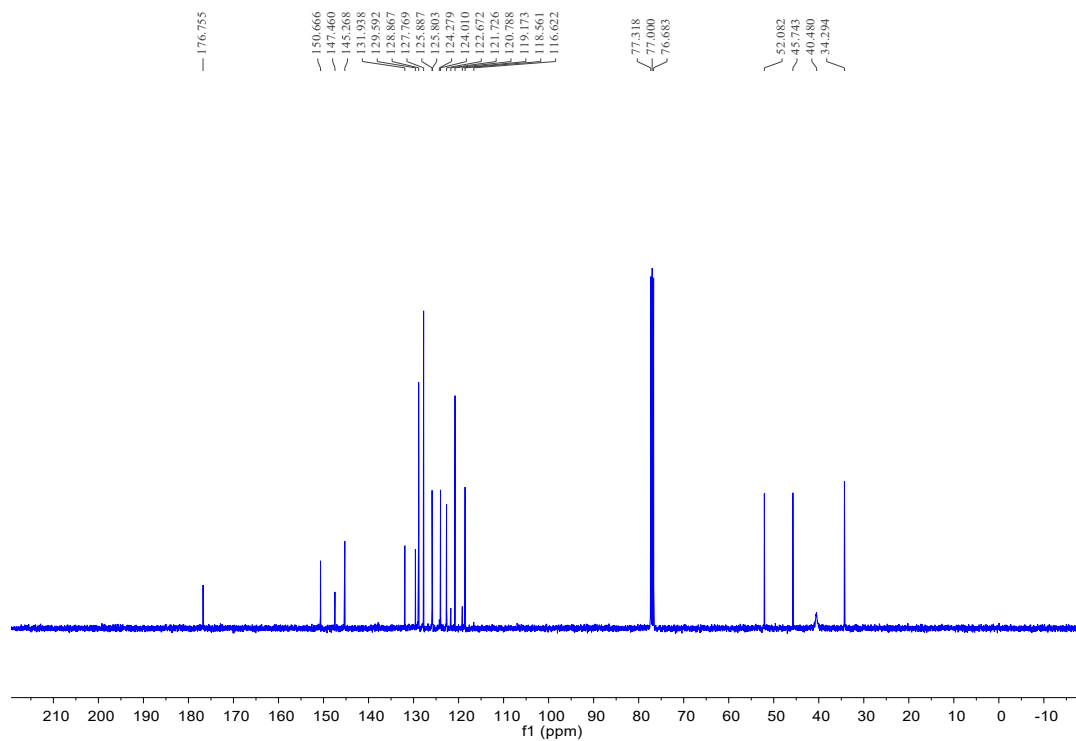

$^{19}\text{F}$  NMR (376 MHz,  $\text{CDCl}_3$ )

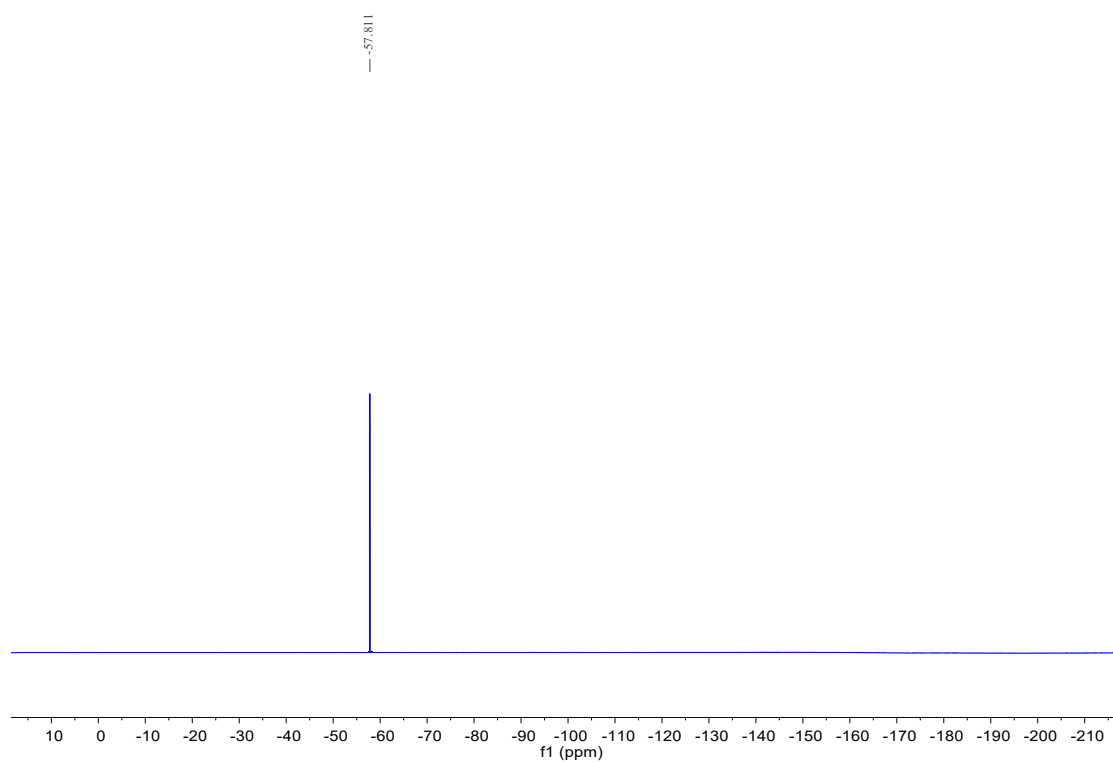

$^1\text{H}$ ,  $^{13}\text{C}$  NMR and  $^{19}\text{F}$  NMR Spectra for Compound *cis*-3ka:

$^1\text{H}$  NMR (400 MHz,  $\text{CDCl}_3$ )

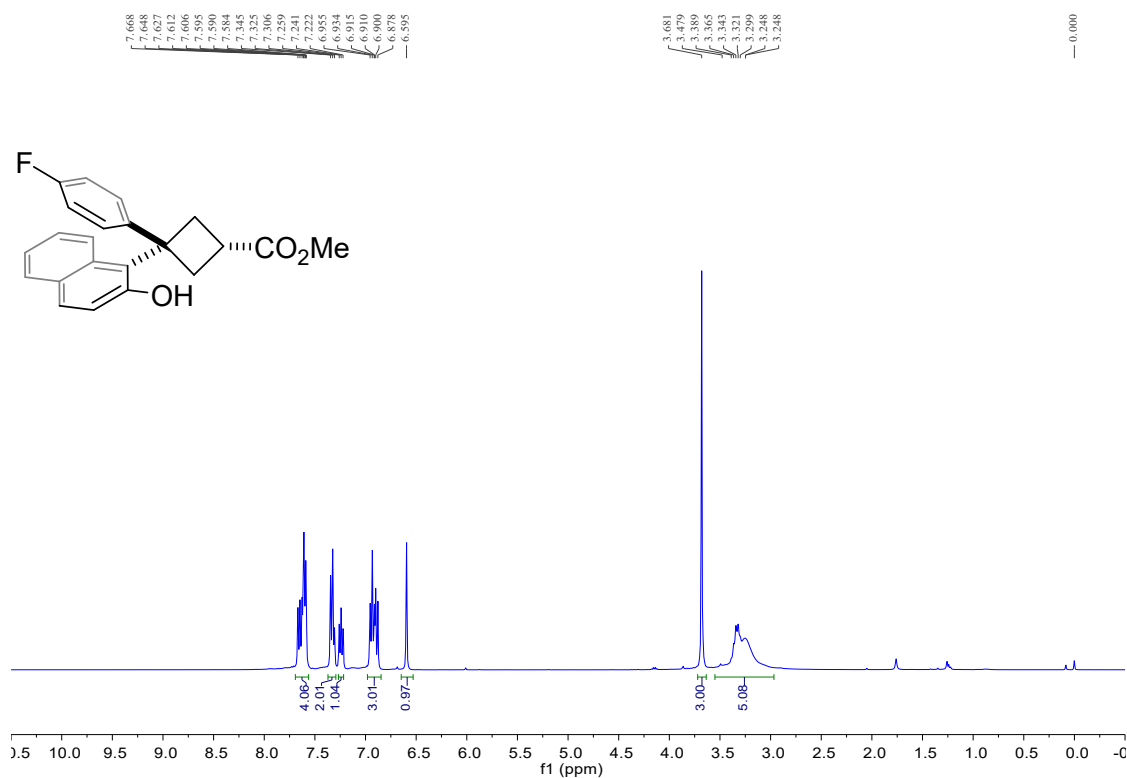**<sup>13</sup>C NMR (100 MHz, CDCl<sub>3</sub>)**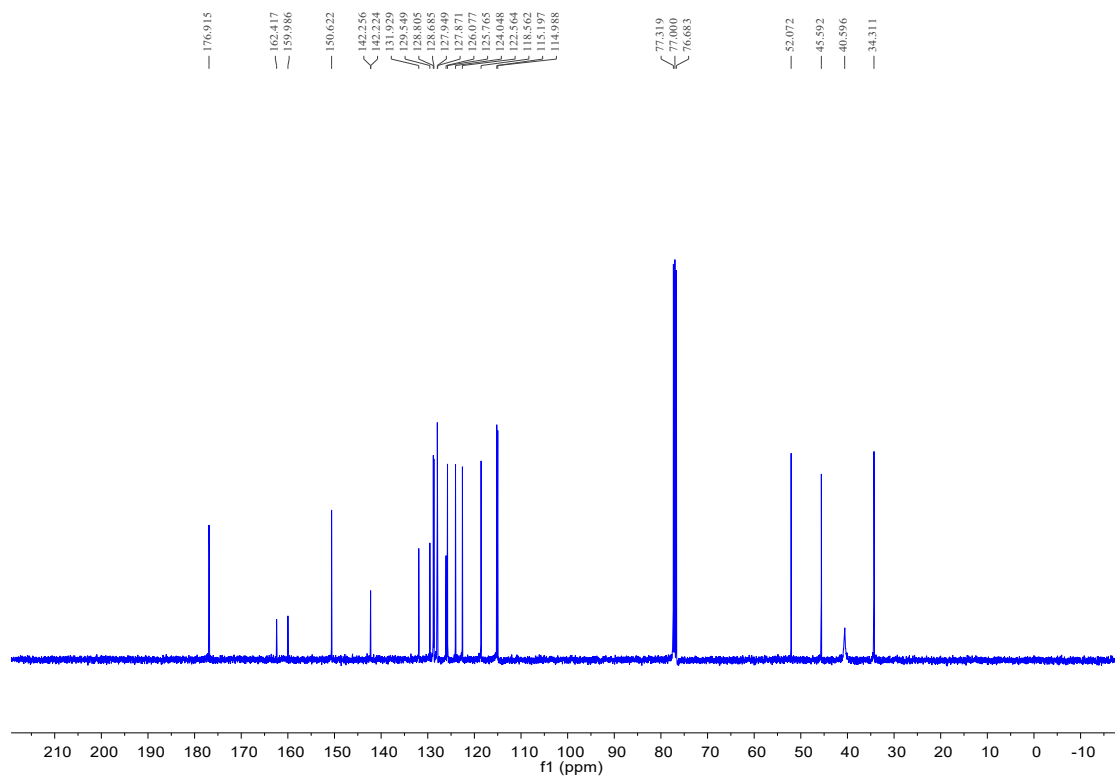

$^{19}\text{F}$  NMR (376 MHz,  $\text{CDCl}_3$ )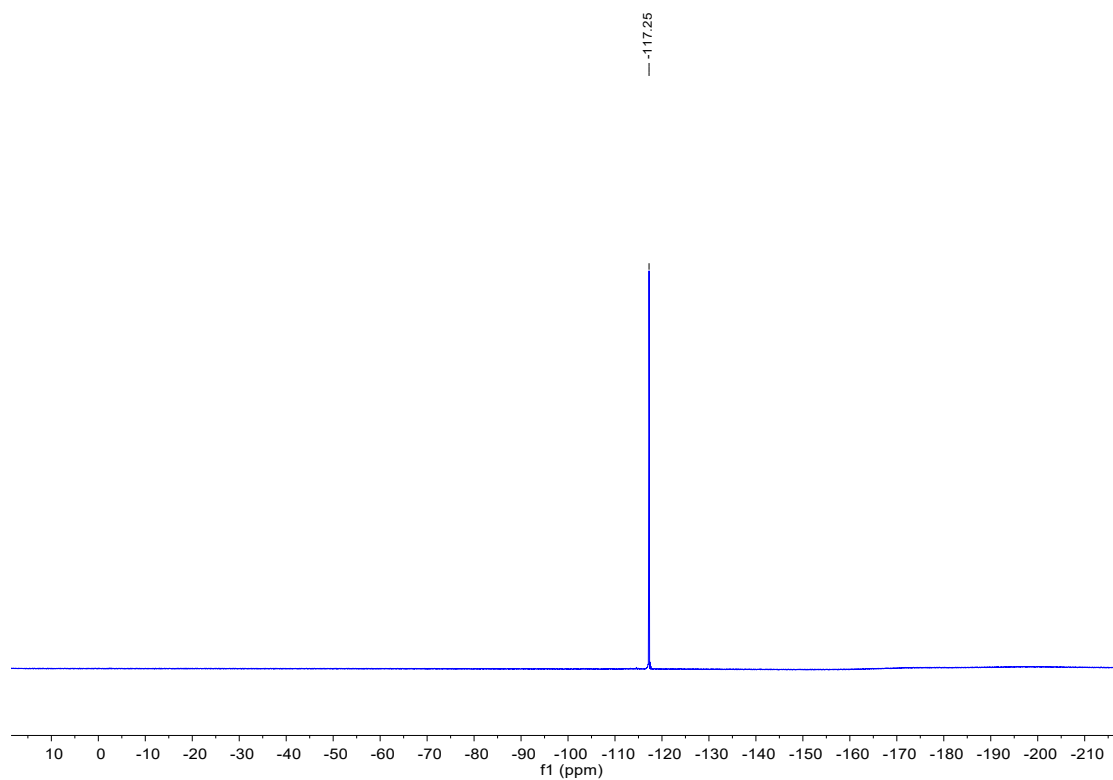 $^1\text{H}$ ,  $^{13}\text{C}$  NMR and  $^{19}\text{F}$  NMR Spectra for Compound *cis*-3Ia: $^1\text{H}$  NMR (400 MHz,  $\text{CDCl}_3$ )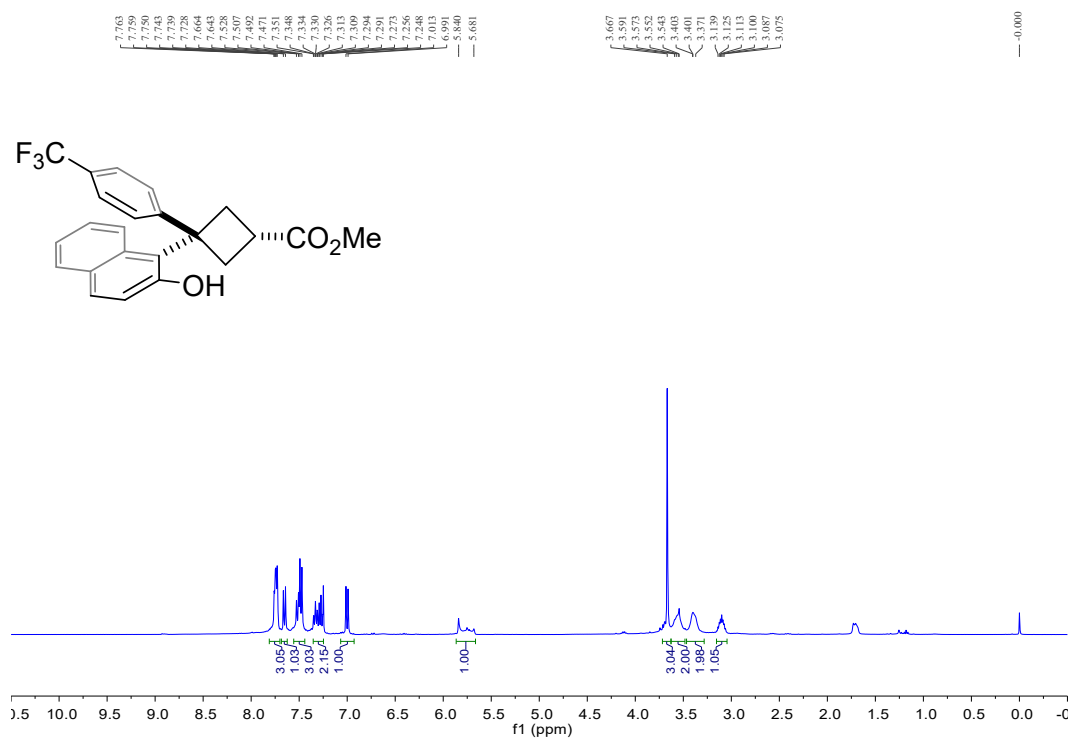

$^{13}\text{C}$  NMR (100 MHz,  $\text{CDCl}_3$ )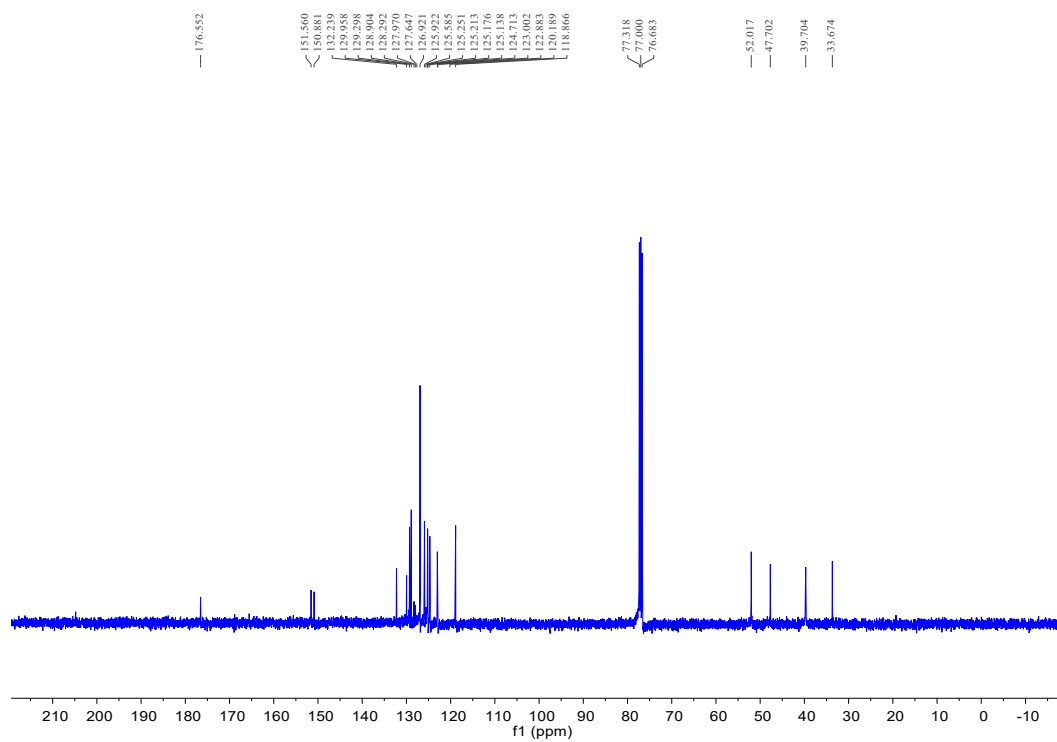 $^{19}\text{F}$  NMR (376 MHz,  $\text{CDCl}_3$ )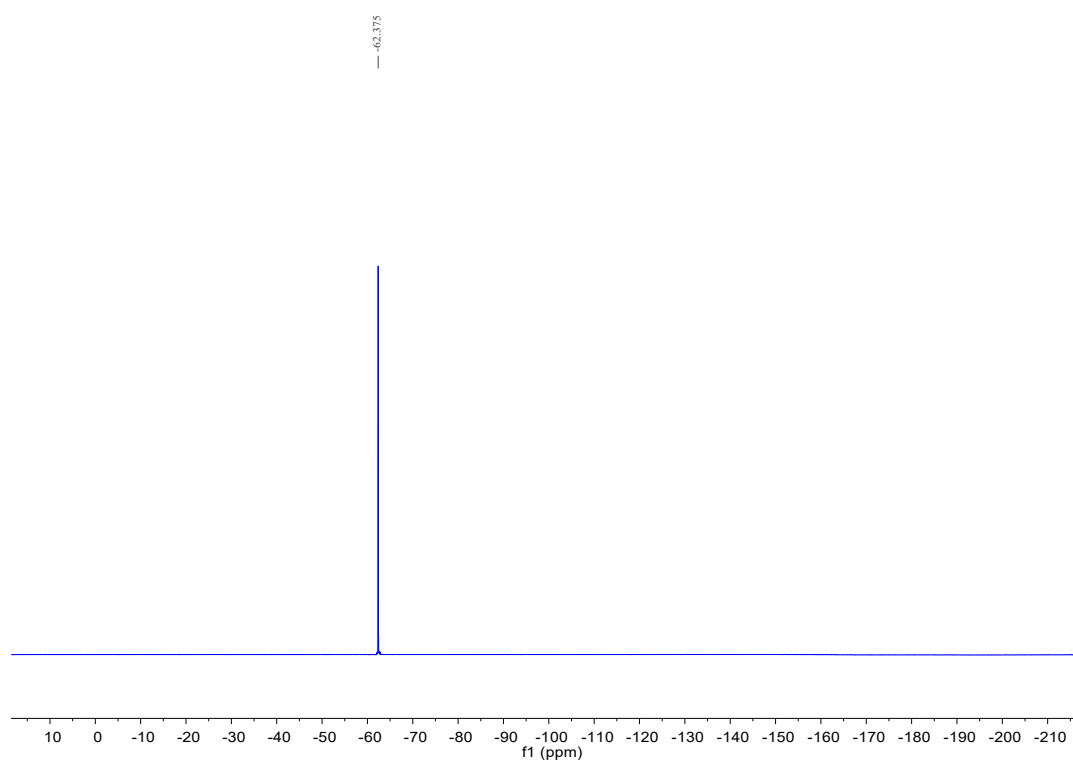 $^1\text{H}$  and  $^{13}\text{C}$  NMR Spectra for Compound *cis*-3ma $^1\text{H}$  NMR (400 MHz,  $\text{CDCl}_3$ )

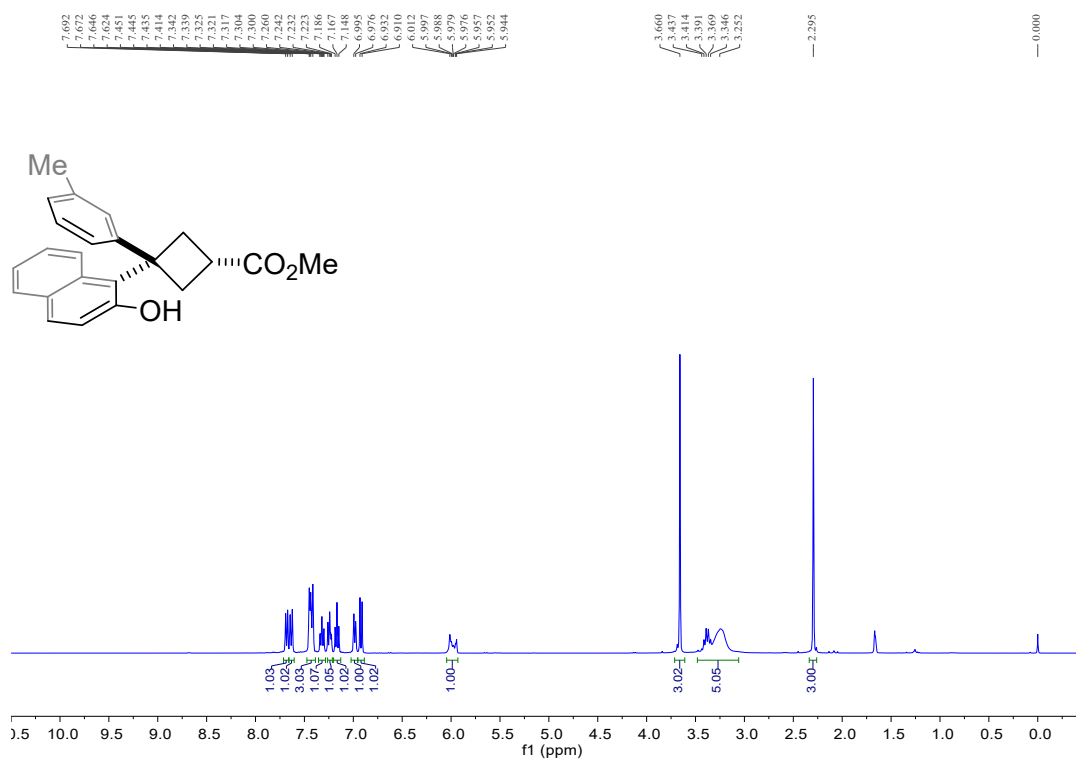<sup>13</sup>C NMR (100 MHz, CDCl<sub>3</sub>)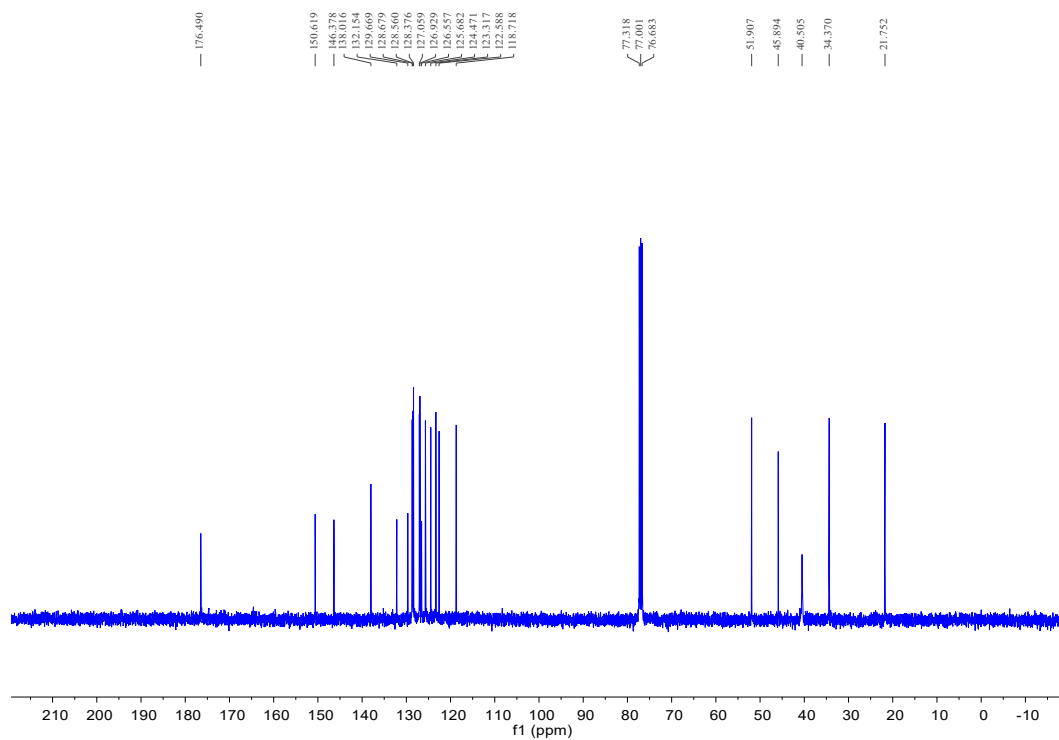<sup>1</sup>H, <sup>13</sup>C NMR and <sup>19</sup>F NMR Spectra for Compound 3na

$^1\text{H}$  NMR (400 MHz,  $\text{CDCl}_3$ )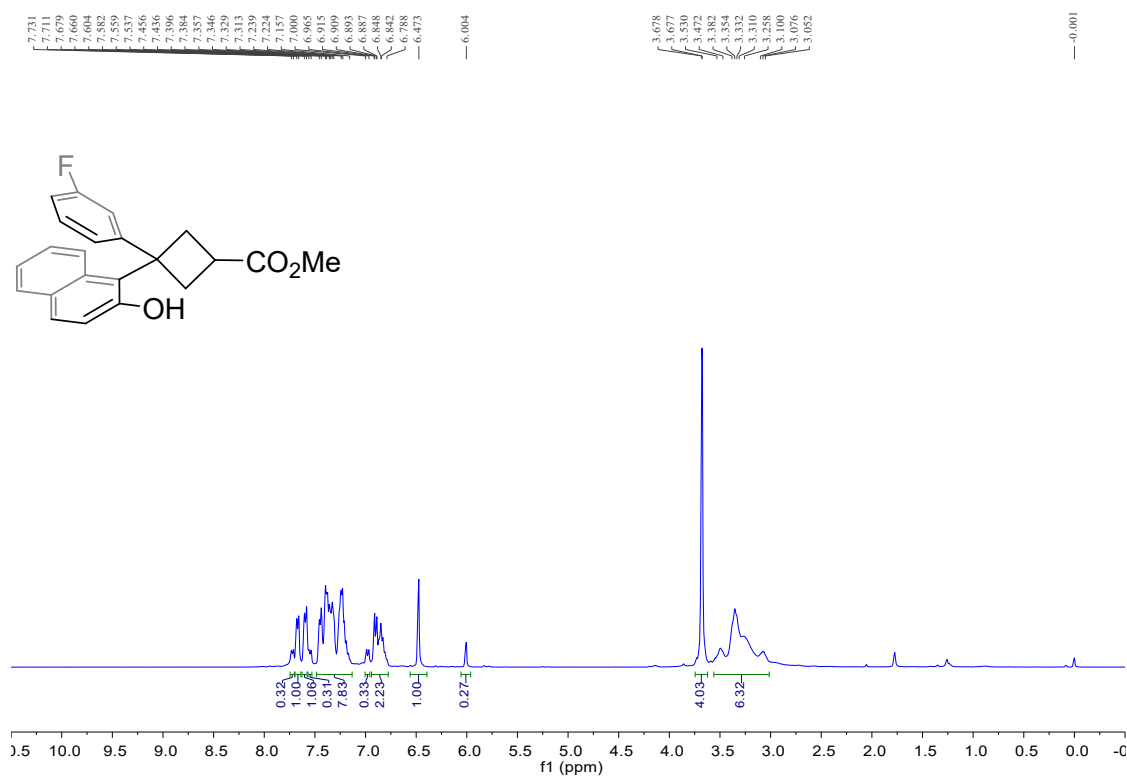 $^{13}\text{C}$  NMR (100 MHz,  $\text{CDCl}_3$ )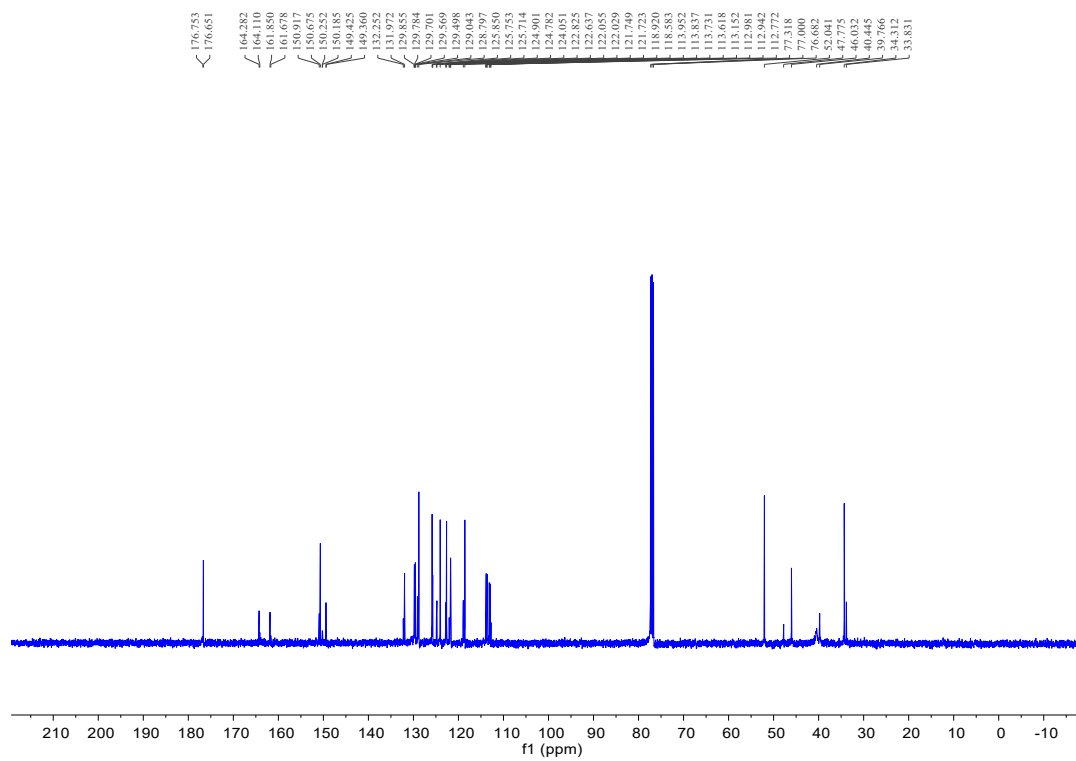 $^{19}\text{F}$  NMR (376 MHz,  $\text{CDCl}_3$ )

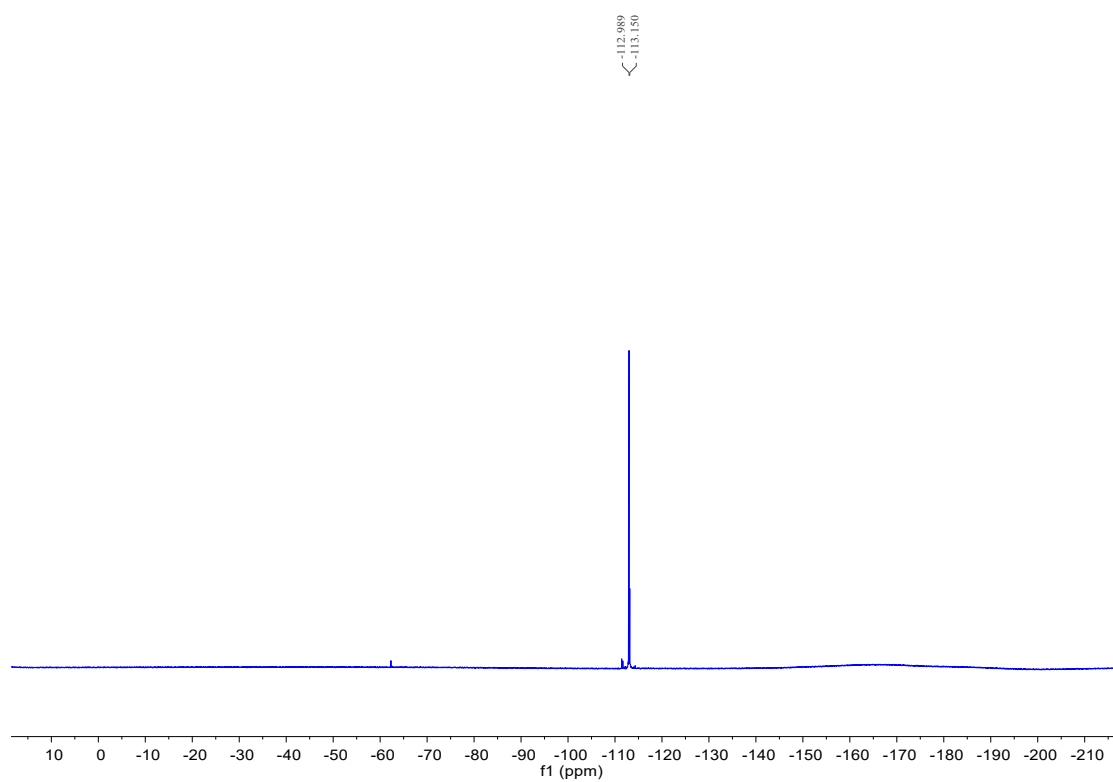

$^1\text{H}$  and  $^{13}\text{C}$  NMR Spectra for Compound *cis*-3ab



$^1\text{H}$  NMR (400 MHz, Acetone- $d_6$ )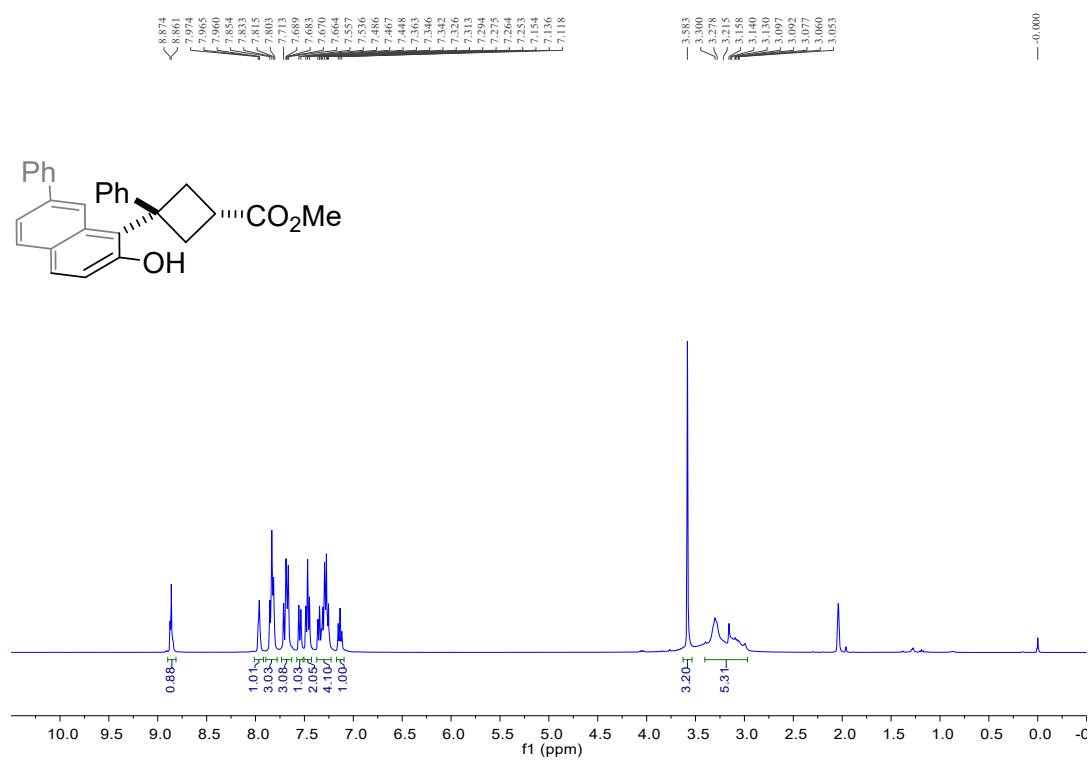 $^{13}\text{C}$  NMR (100 MHz, Acetone- $d_6$ )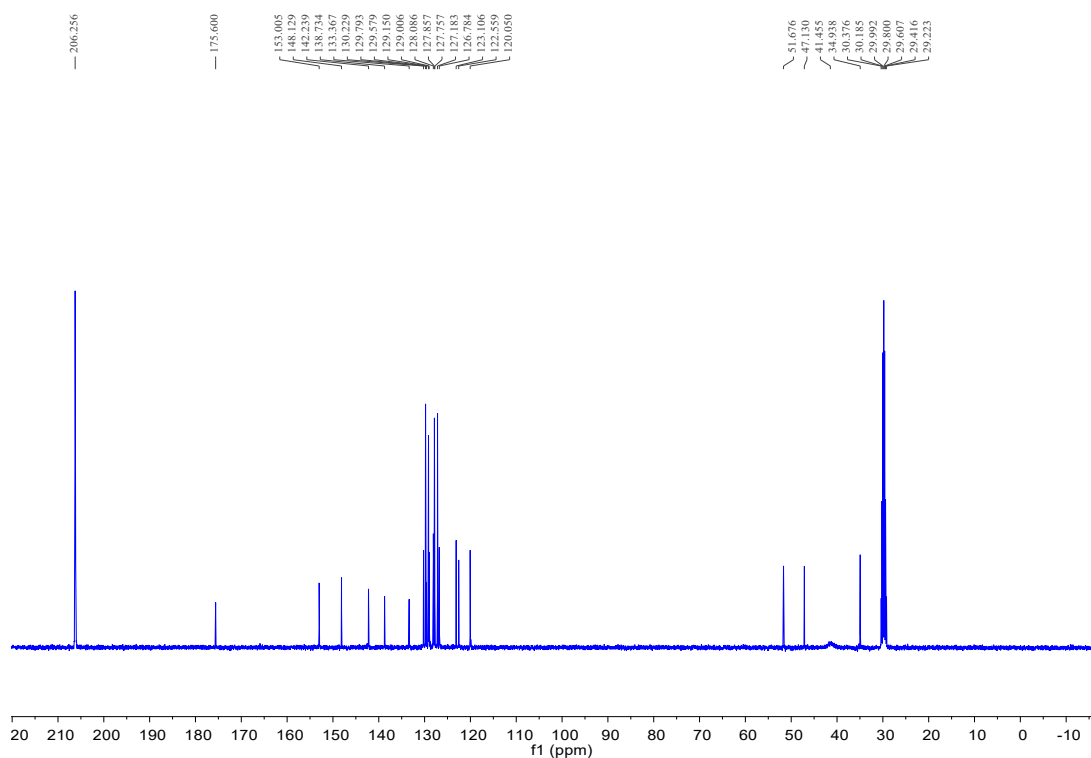 $^1\text{H}$  and  $^{13}\text{C}$  NMR Spectra for Compound 3ac

$^1\text{H}$  NMR (400 MHz,  $\text{CDCl}_3$ )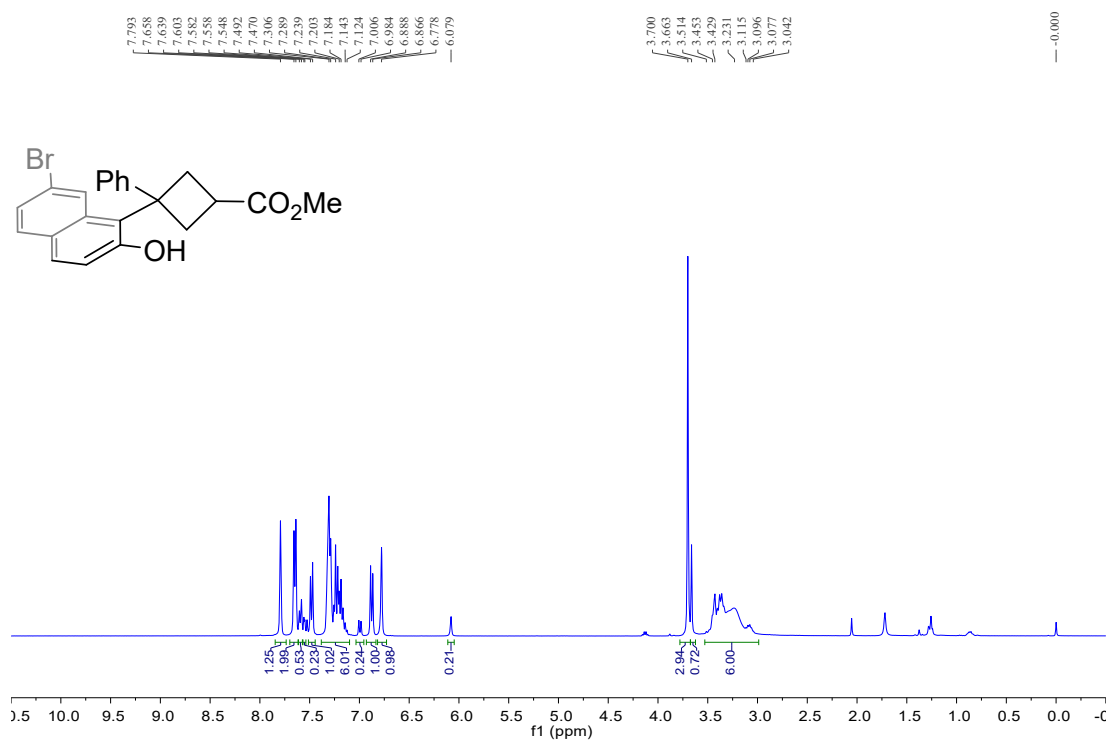 $^{13}\text{C}$  NMR (100 MHz,  $\text{CDCl}_3$ )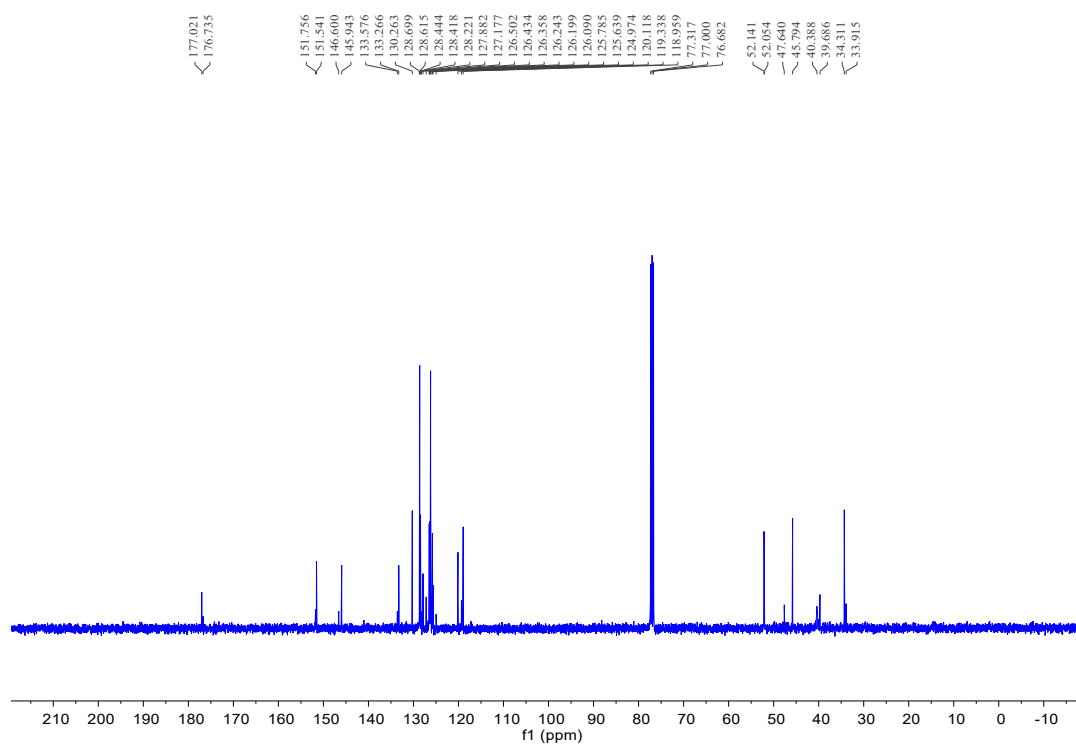 $^1\text{H}$  and  $^{13}\text{C}$  NMR Spectra for Compound *cis*-3ad

$^1\text{H}$  NMR (400 MHz,  $\text{CDCl}_3$ )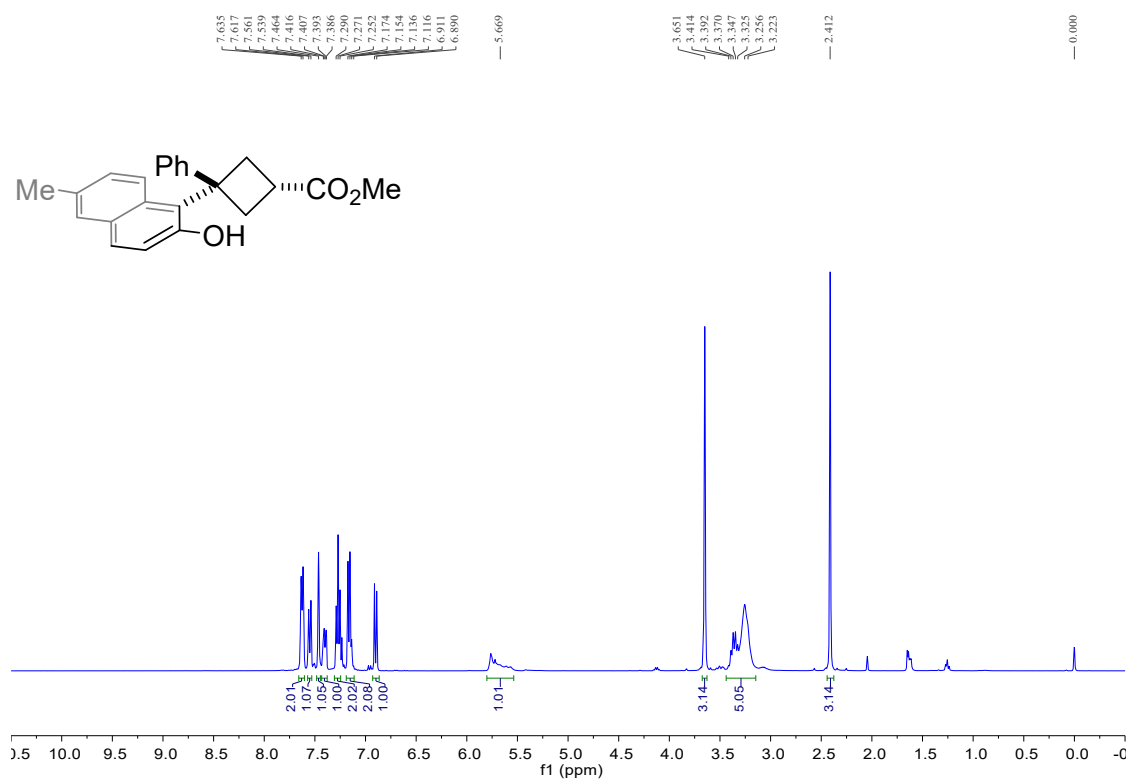

$^{13}\text{C}$  NMR (100 MHz,  $\text{CDCl}_3$ )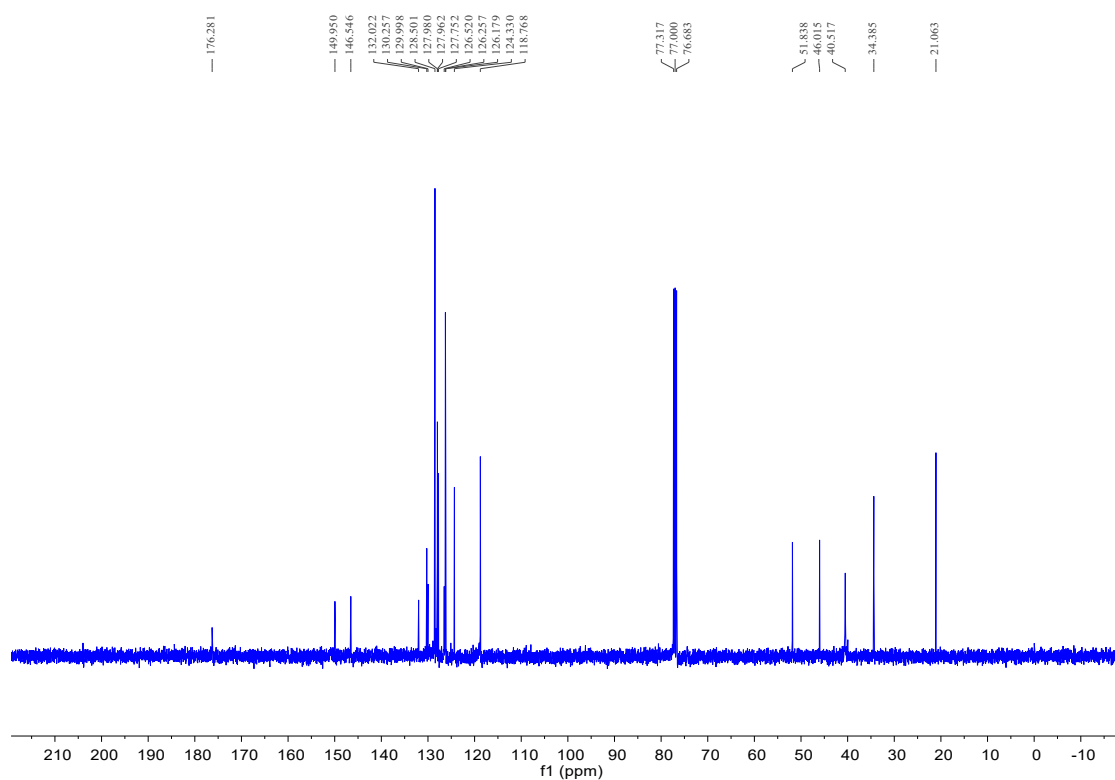 $^1\text{H}$  and  $^{13}\text{C}$  NMR Spectra for Compound *cis*-3ae $^1\text{H}$  NMR (400 MHz,  $\text{CDCl}_3$ )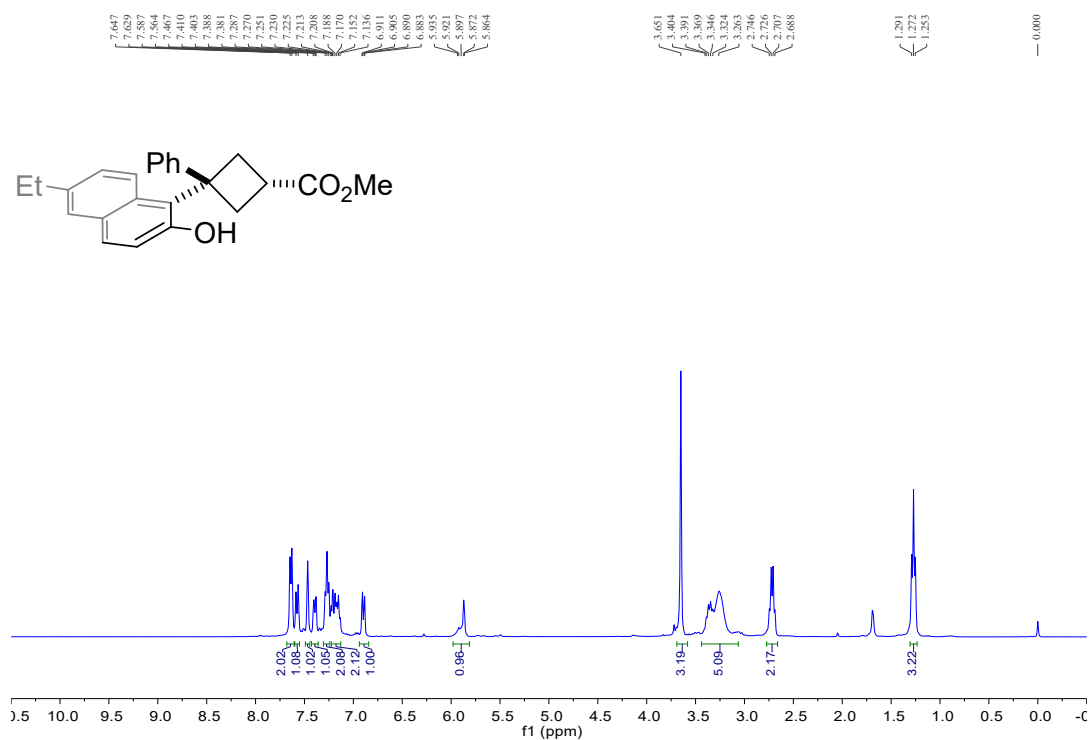

$^{13}\text{C}$  NMR (100 MHz,  $\text{CDCl}_3$ )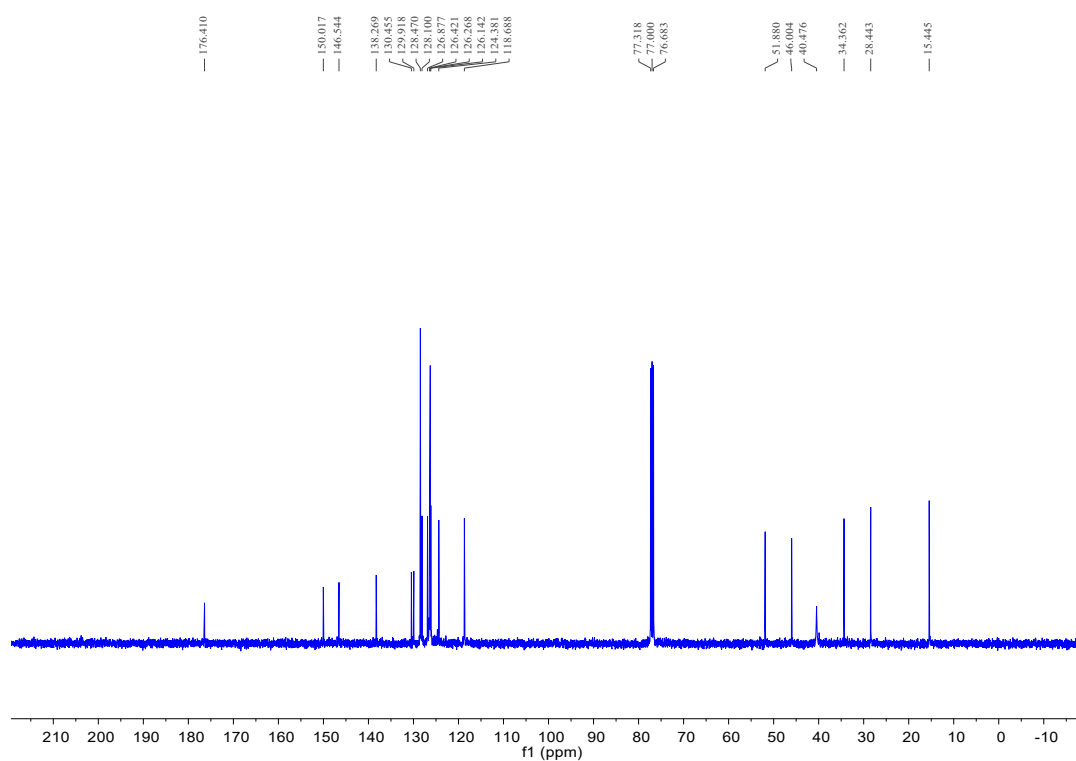 $^1\text{H}$  and  $^{13}\text{C}$  NMR Spectra for Compound *cis*-3af $^1\text{H}$  NMR (400 MHz,  $\text{CDCl}_3$ )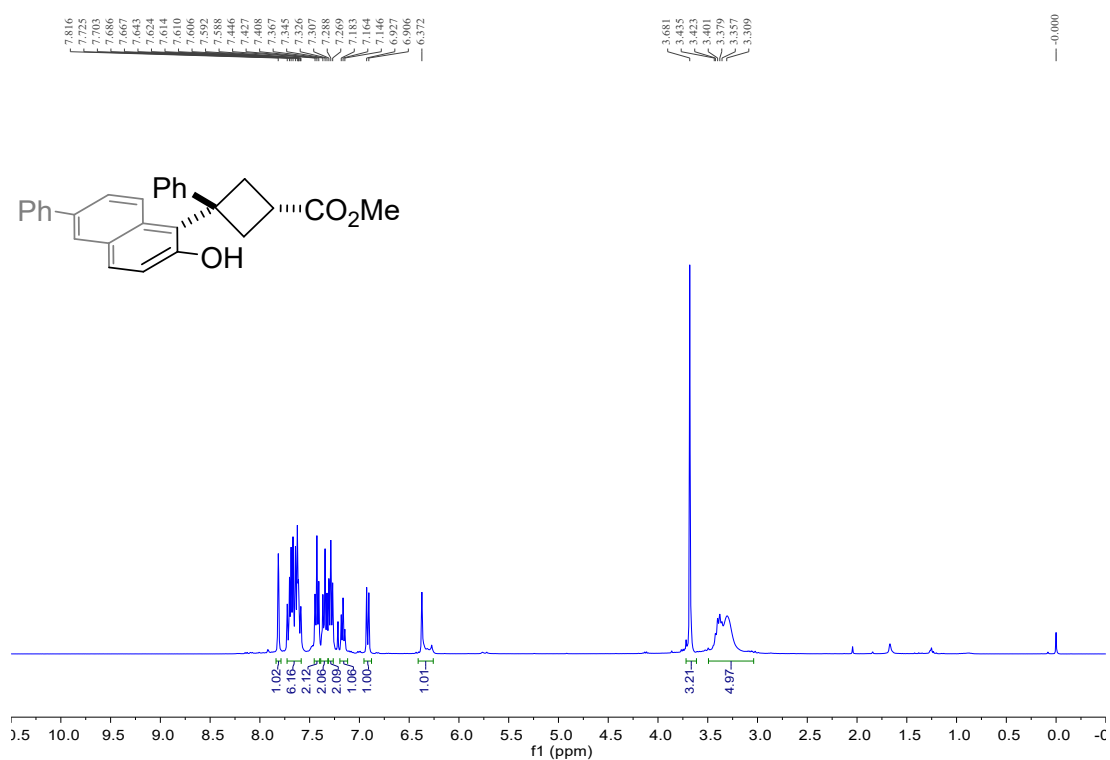

$^{13}\text{C}$  NMR (100 MHz,  $\text{CDCl}_3$ )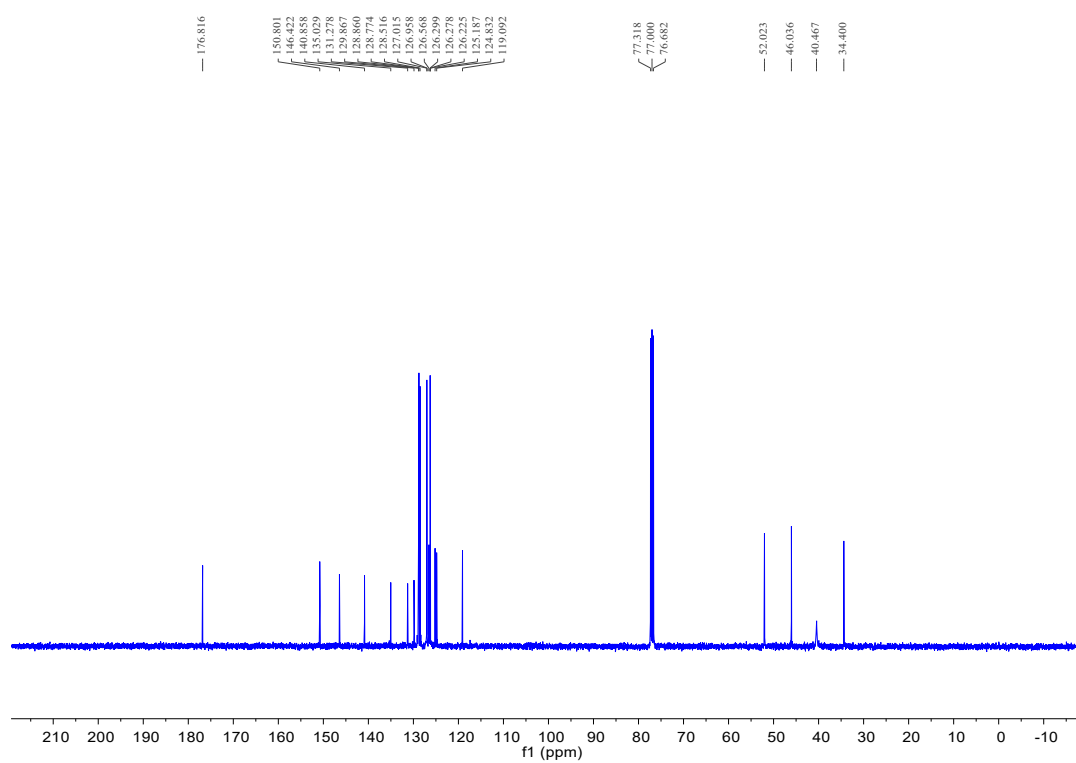 $^1\text{H}$  and  $^{13}\text{C}$  NMR Spectra for Compound *cis*-3ag $^1\text{H}$  NMR (400 MHz,  $\text{CDCl}_3$ )

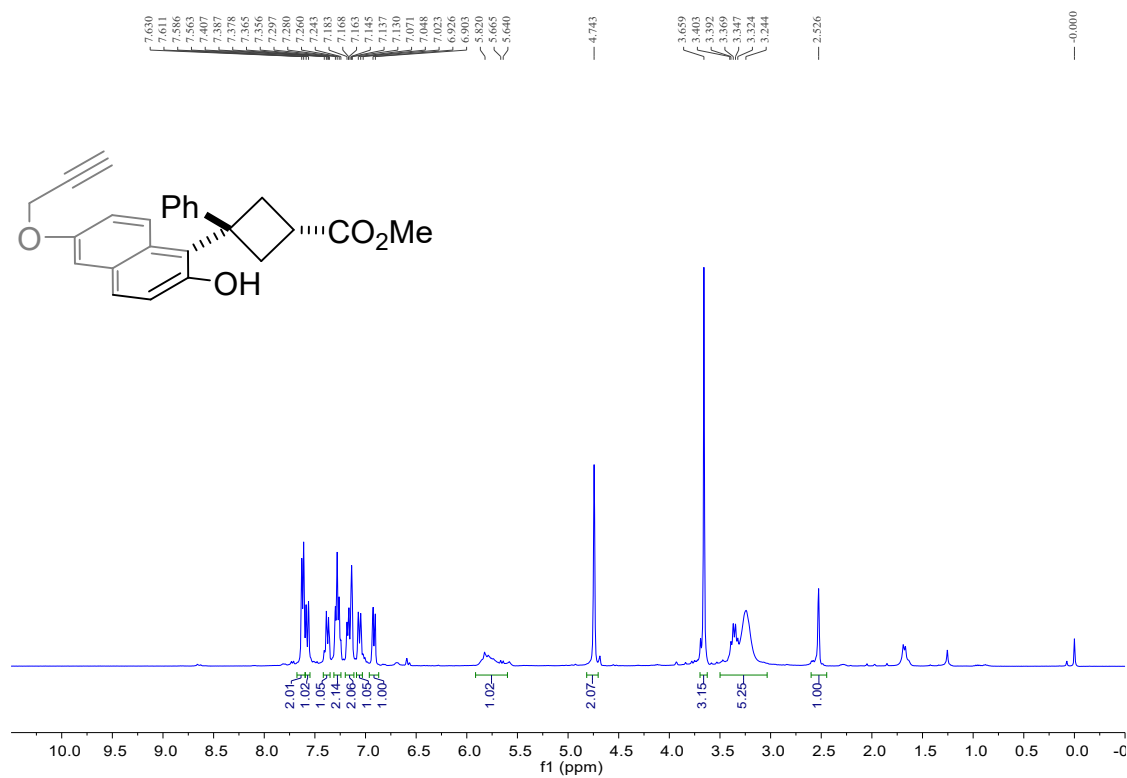**<sup>13</sup>C NMR (100 MHz, CDCl<sub>3</sub>)**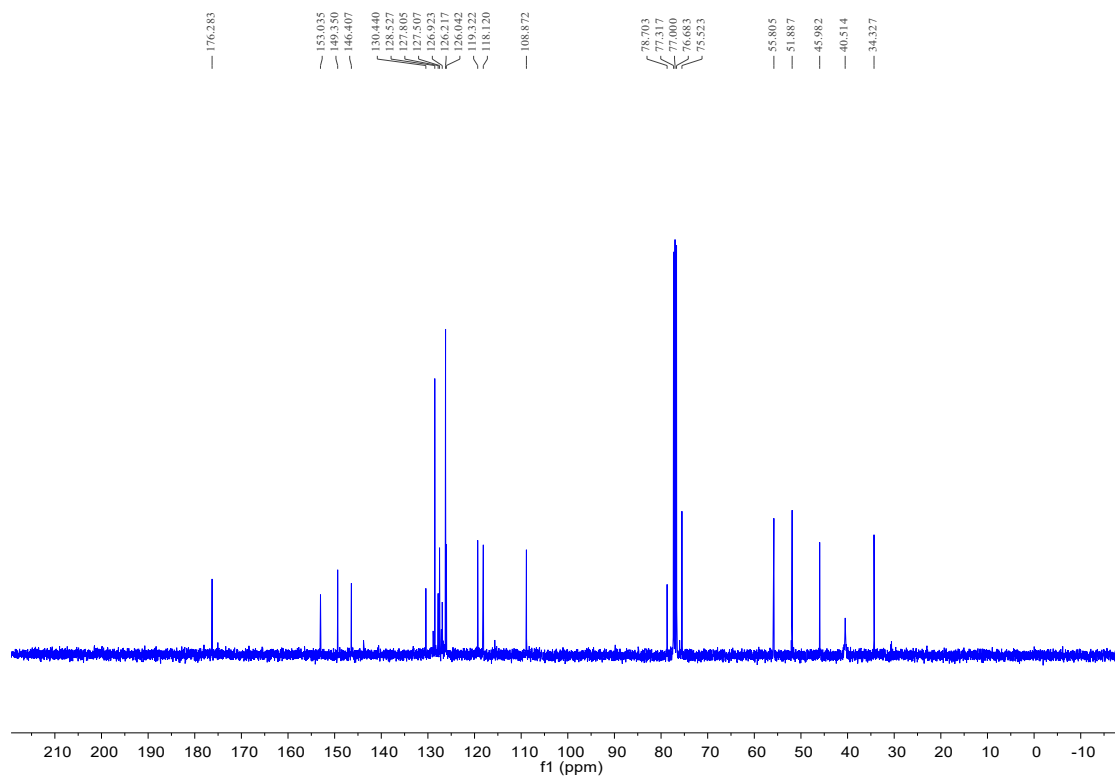

**$^1\text{H}$  and  $^{13}\text{C}$  NMR Spectra for Compound *cis*-3ah** $^1\text{H}$  NMR (400 MHz,  $\text{CDCl}_3$ )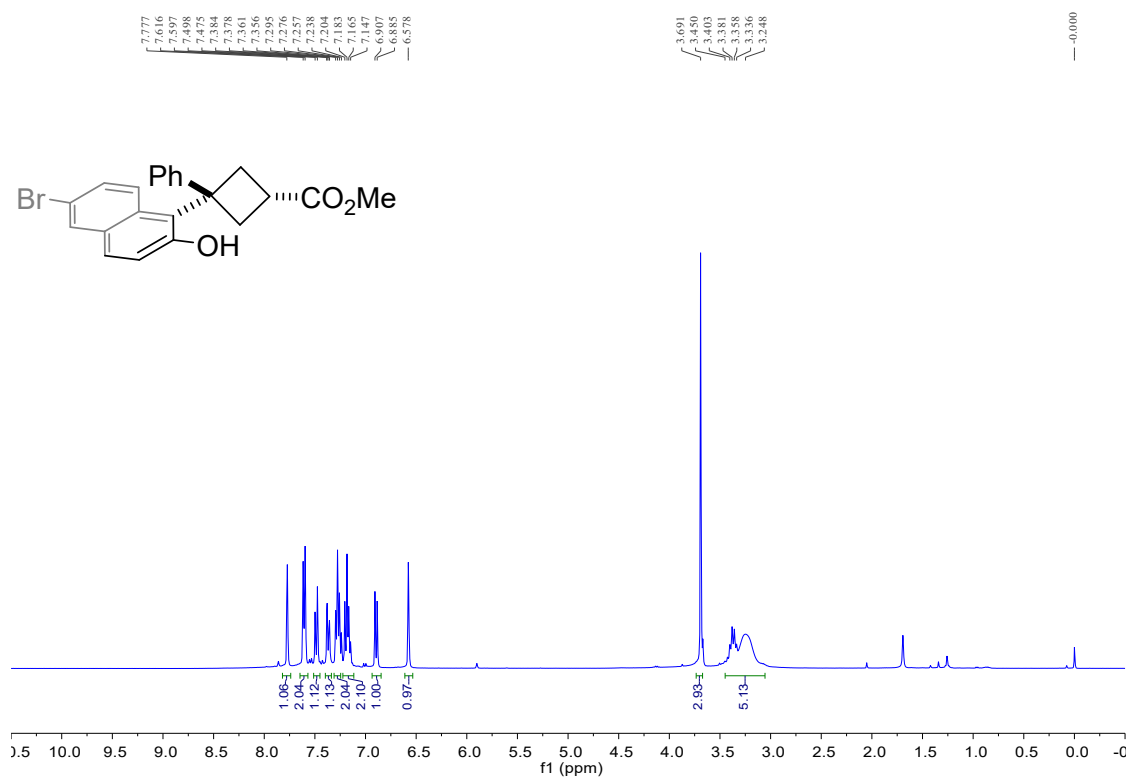



$^{13}\text{C}$  NMR (100 MHz,  $\text{CDCl}_3$ )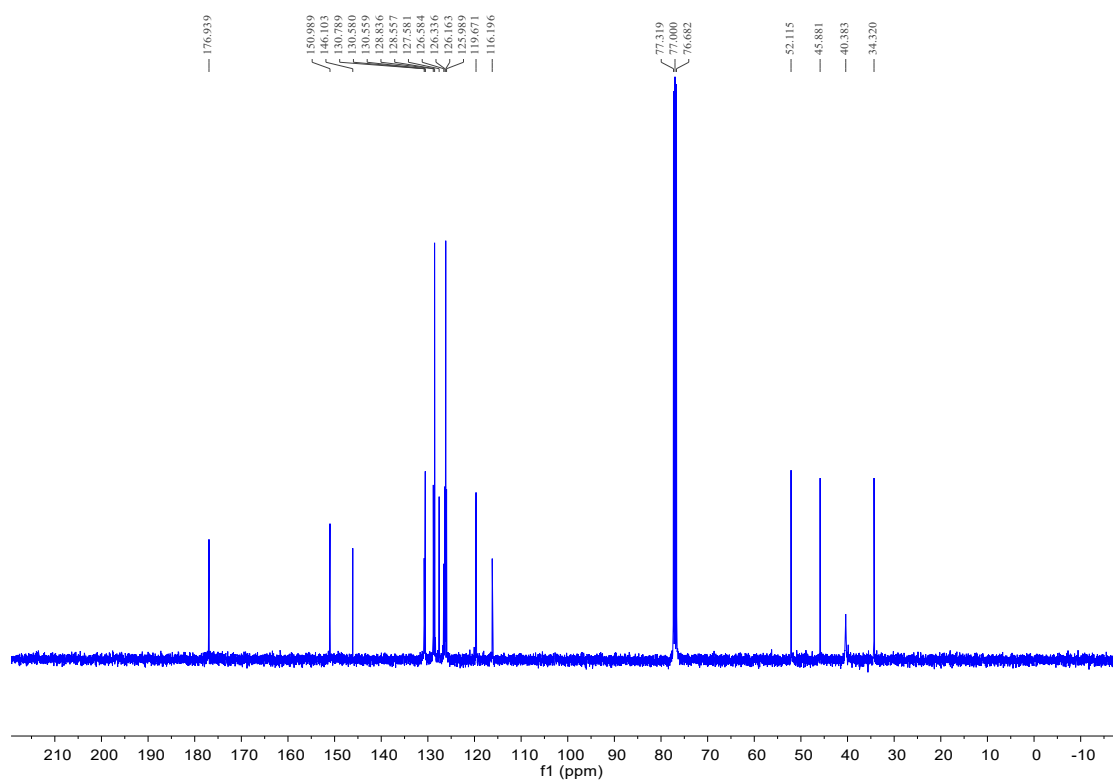 $^1\text{H}$  and  $^{13}\text{C}$  NMR Spectra for Compound *cis*-3ai $^1\text{H}$  NMR (400 MHz,  $\text{CDCl}_3$ )

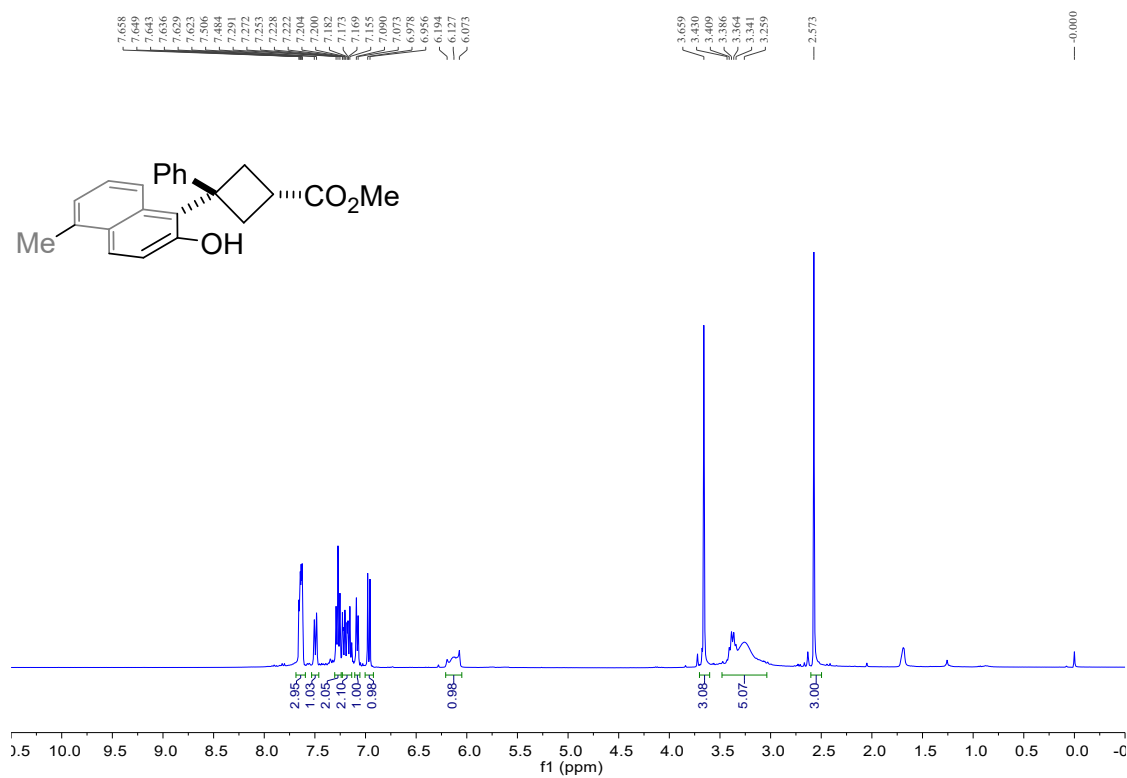**<sup>13</sup>C NMR (100 MHz, CDCl<sub>3</sub>)**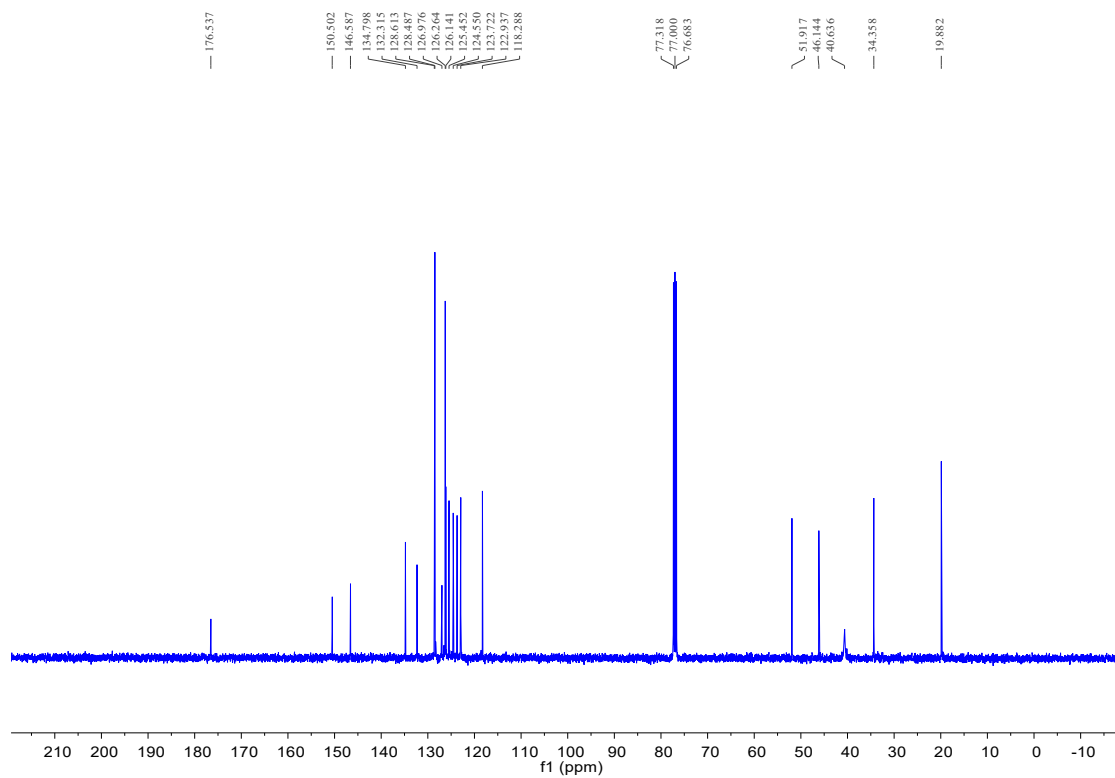

**$^1\text{H}$  and  $^{13}\text{C}$  NMR Spectra for Compound *cis*-3aj** $^1\text{H}$  NMR (400 MHz, Acetone- $d_6$ )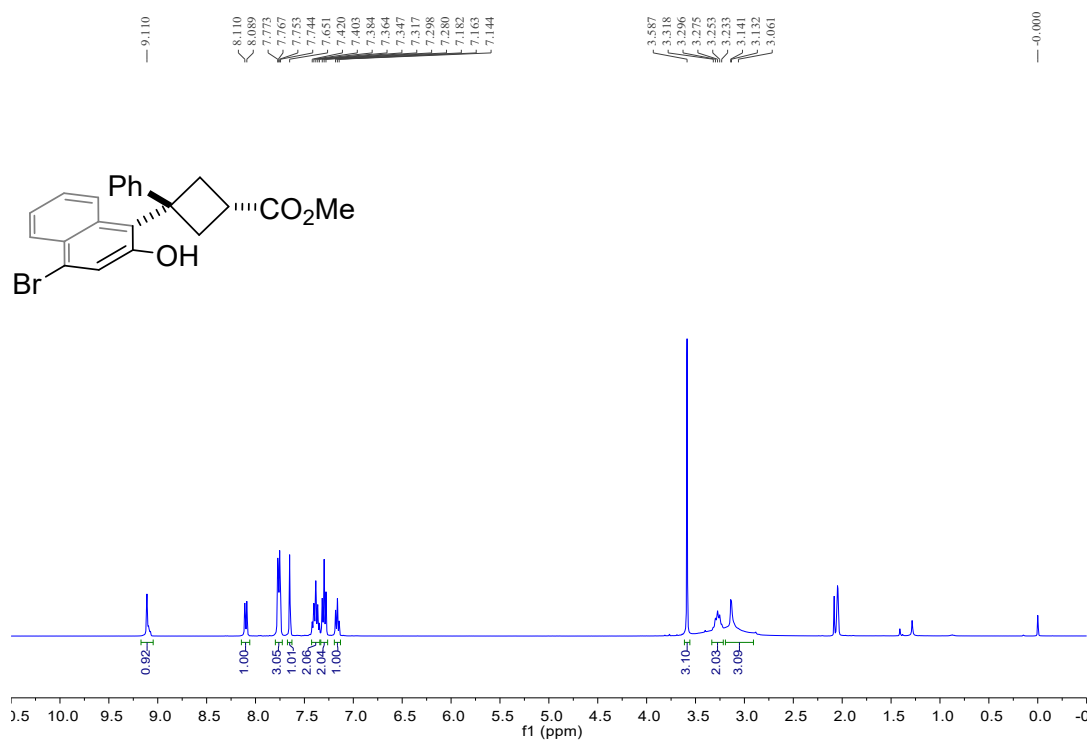 $^{13}\text{C}$  NMR (100 MHz, Acetone- $d_6$ )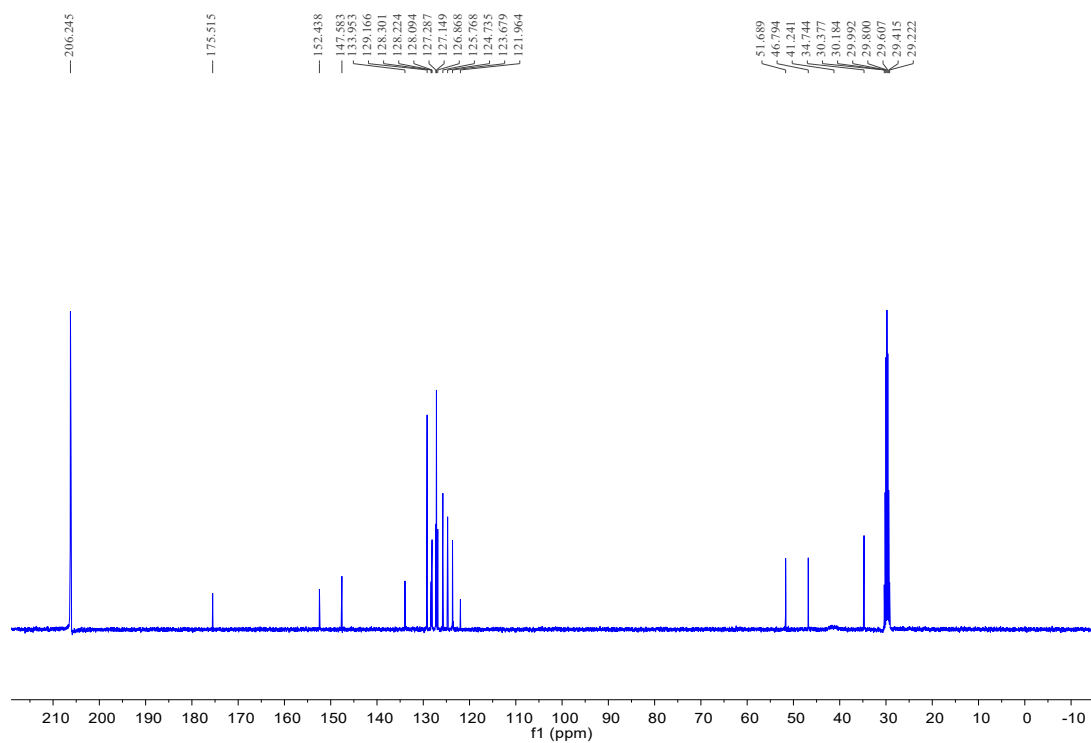

**<sup>1</sup>H and <sup>13</sup>C NMR Spectra for Compound *cis*-3ak**<sup>1</sup>H NMR (400 MHz, CDCl<sub>3</sub>)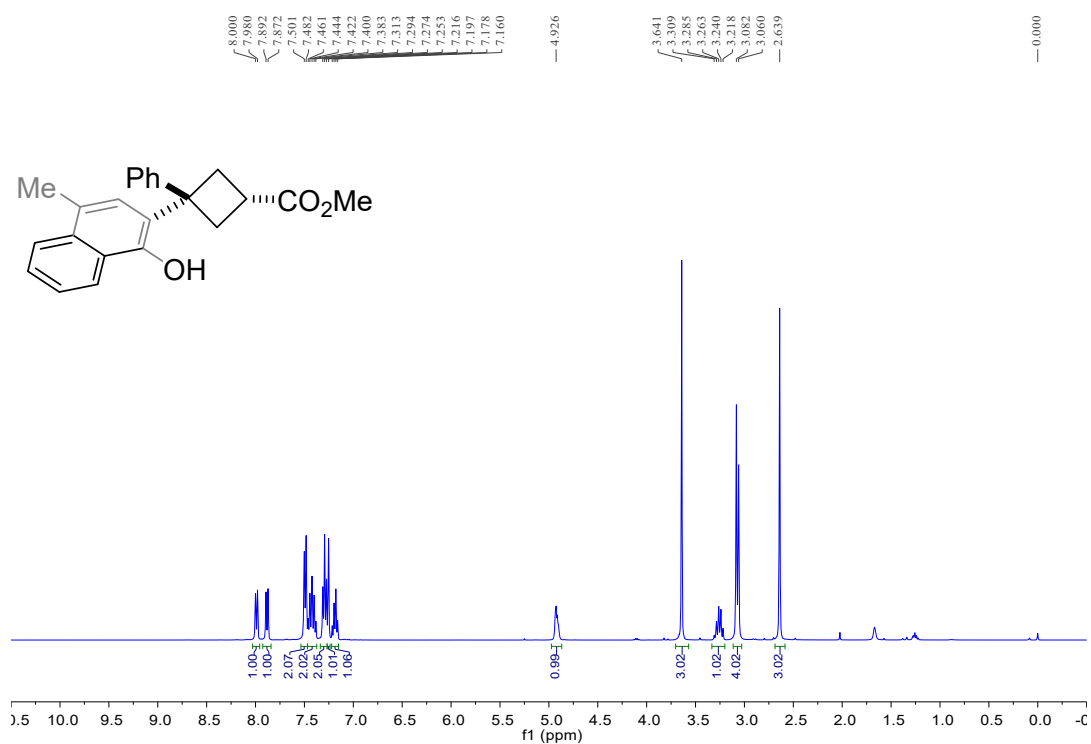<sup>13</sup>C NMR (100 MHz, CDCl<sub>3</sub>)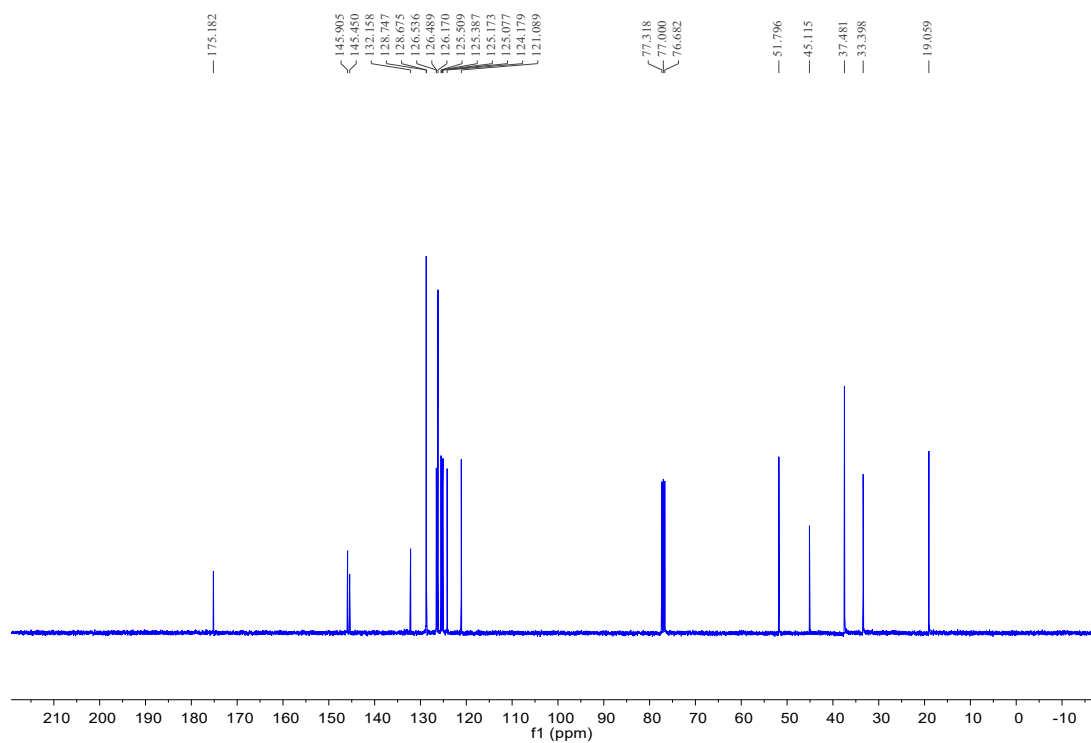

**$^1\text{H}$  and  $^{13}\text{C}$  NMR Spectra for Compound *cis*-3aI** $^1\text{H}$  NMR (400 MHz,  $\text{CDCl}_3$ )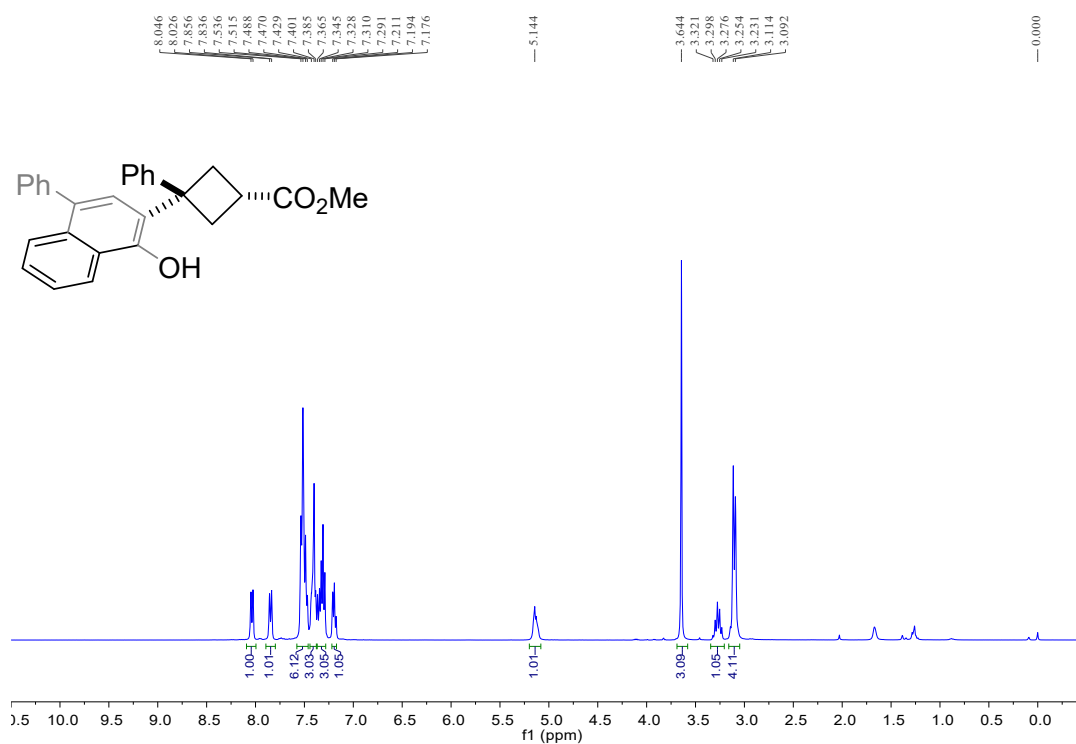 $^{13}\text{C}$  NMR (100 MHz,  $\text{CDCl}_3$ )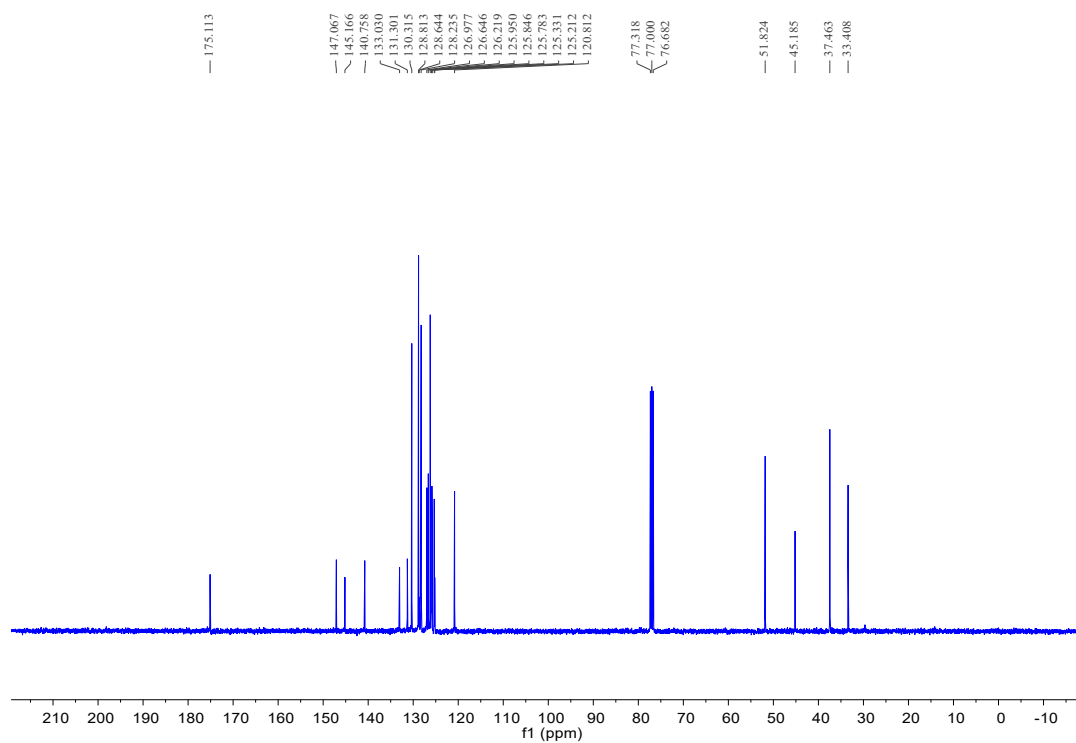

**$^1\text{H}$  and  $^{13}\text{C}$  NMR Spectra for Compound *cis*-3am** $^1\text{H}$  NMR (400 MHz,  $\text{CDCl}_3$ )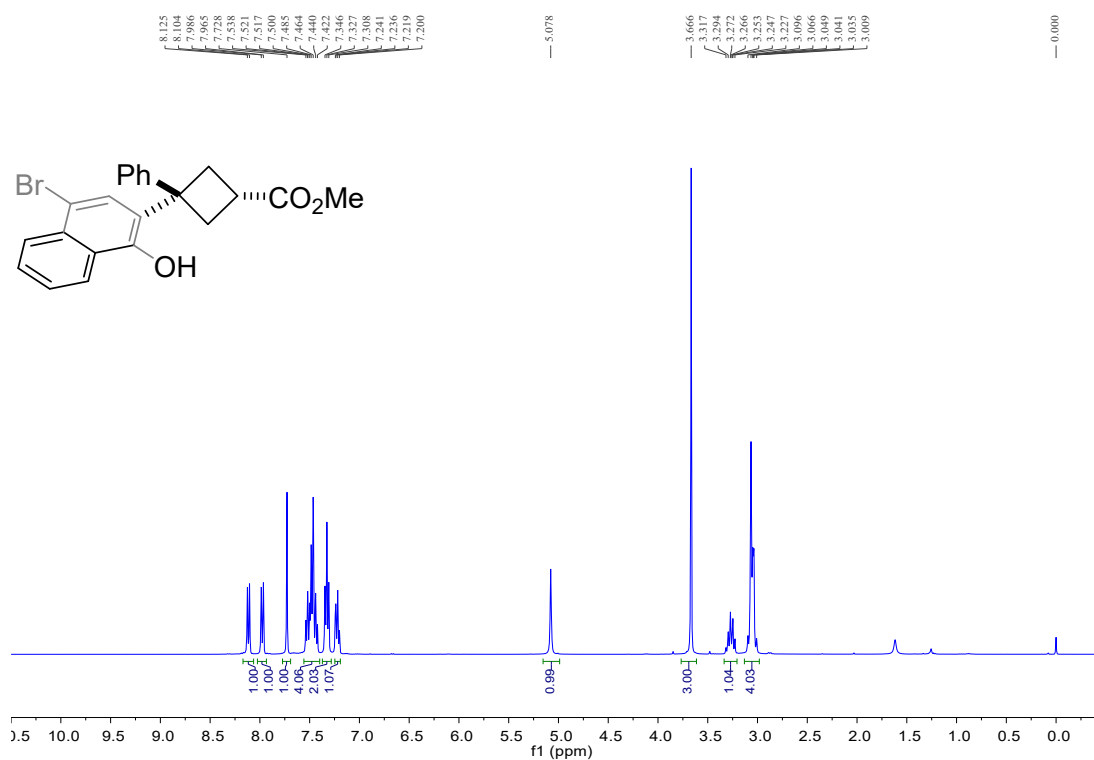 $^{13}\text{C}$  NMR (100 MHz,  $\text{CDCl}_3$ )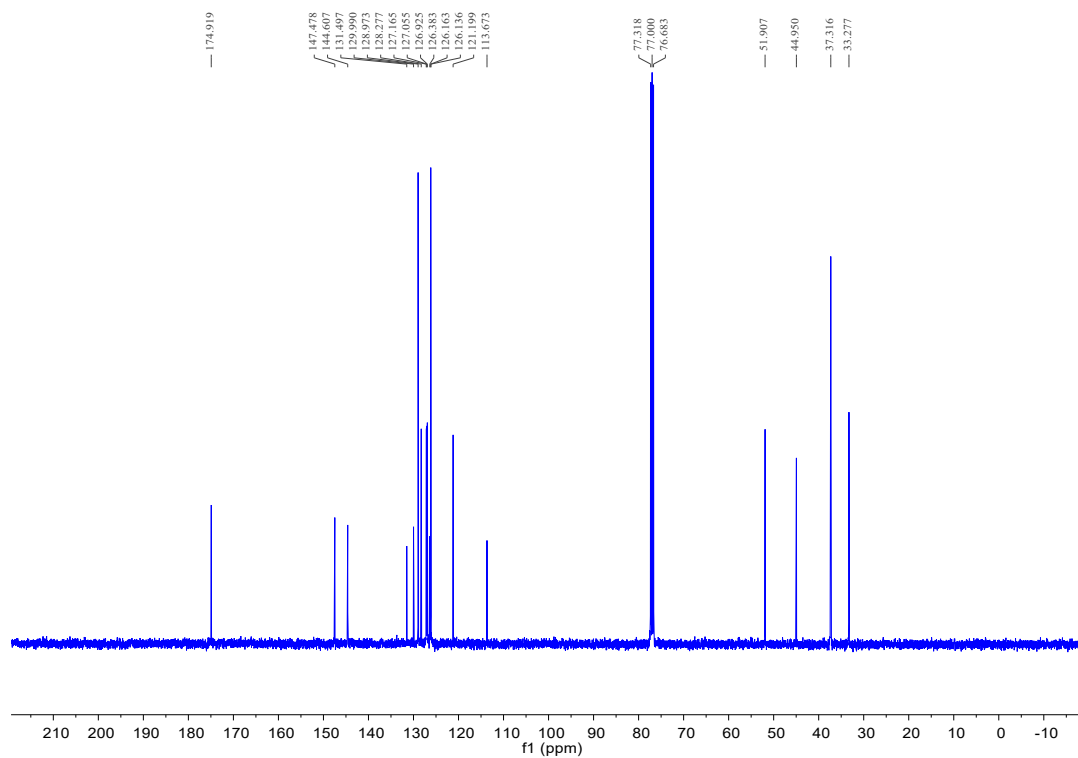

**$^1\text{H}$  and  $^{13}\text{C}$  NMR Spectra for Compound *cis*-3an** $^1\text{H}$  NMR (400 MHz,  $\text{CDCl}_3$ )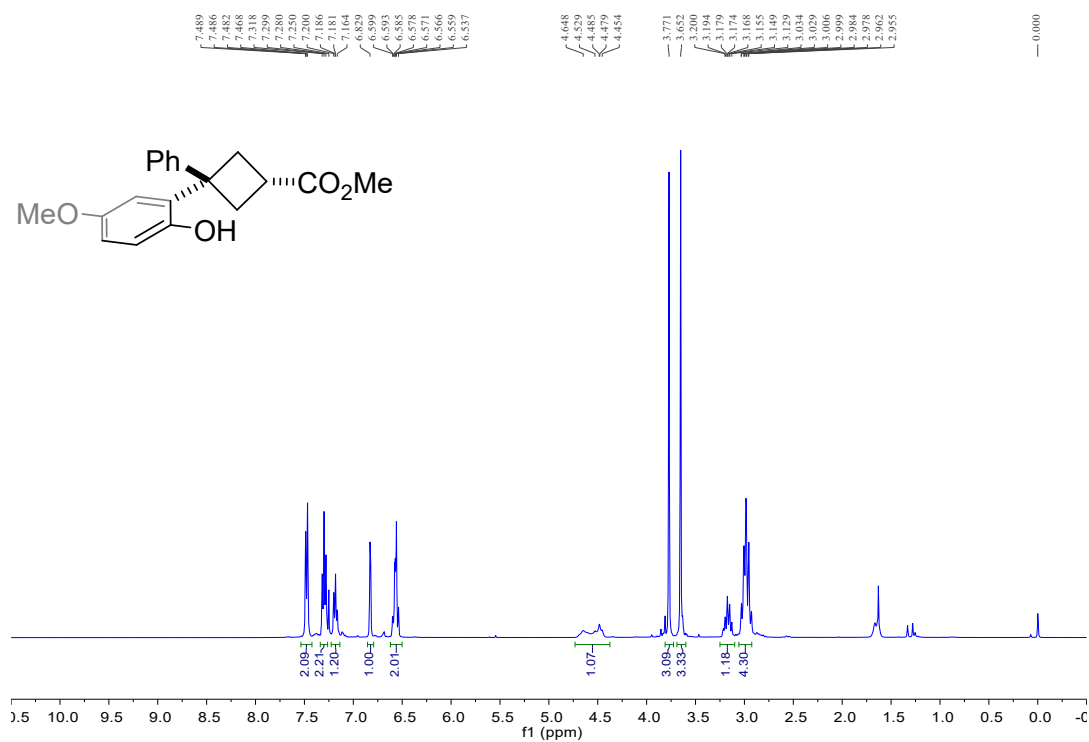 $^{13}\text{C}$  NMR (100 MHz,  $\text{CDCl}_3$ )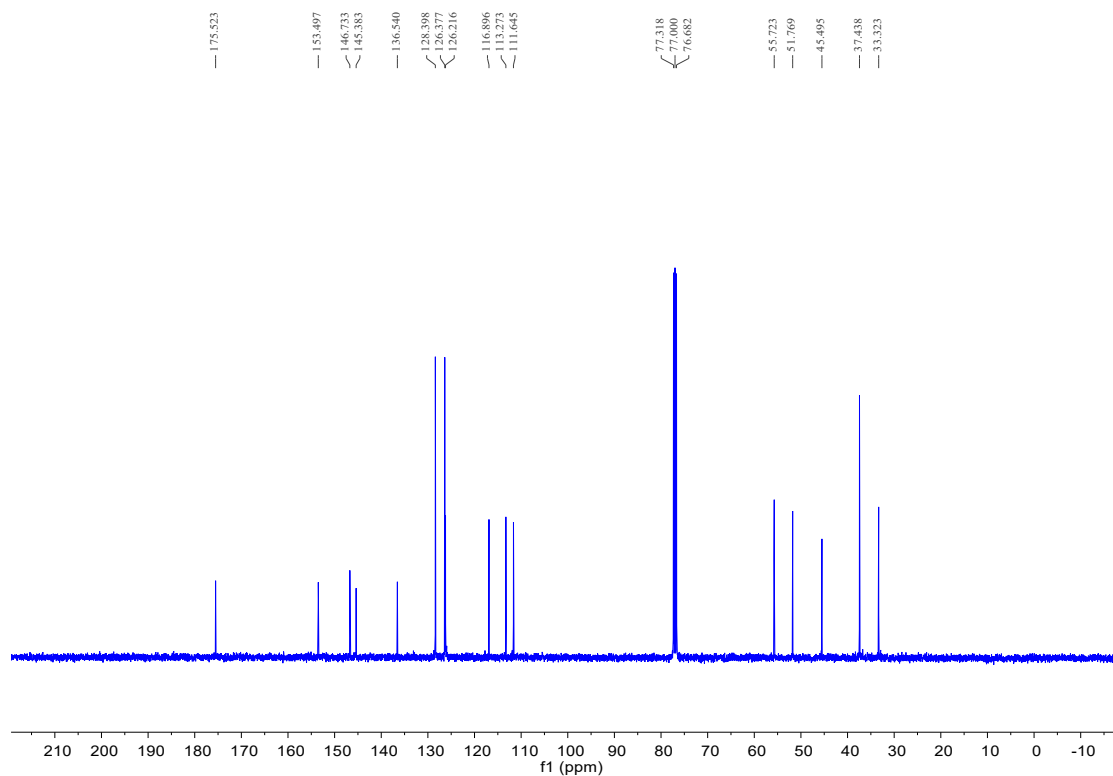

**$^1\text{H}$  and  $^{13}\text{C}$  NMR Spectra for Compound *cis*-3ao** $^1\text{H}$  NMR (400 MHz,  $\text{CDCl}_3$ )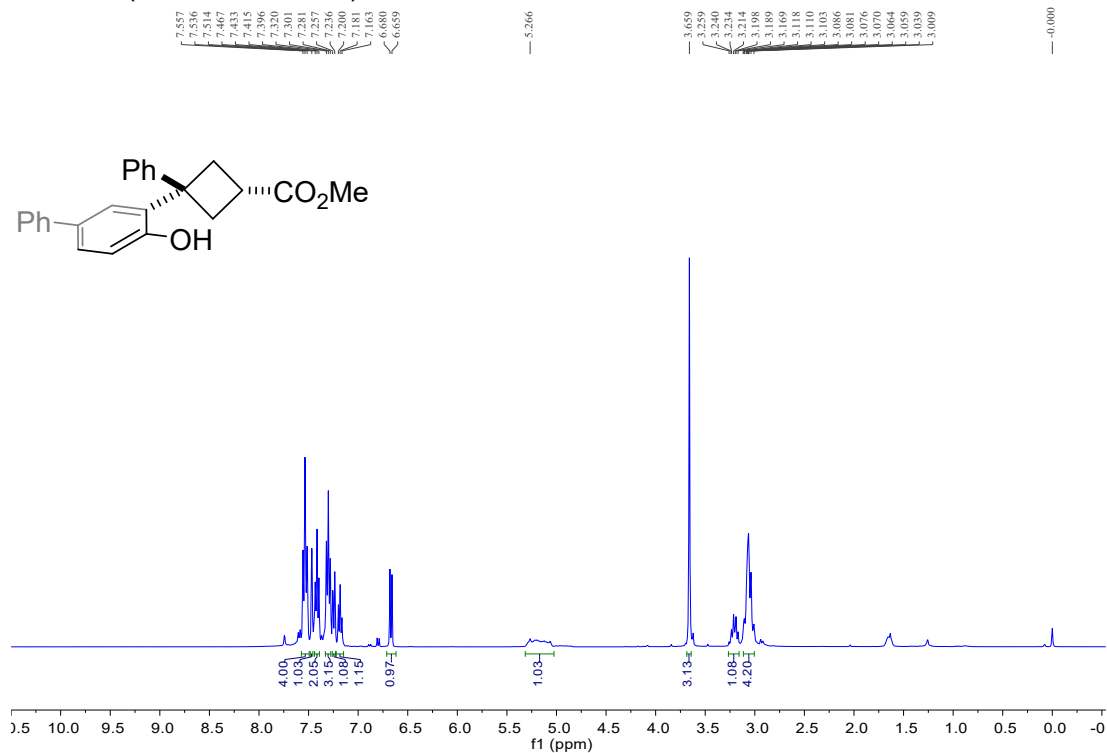 $^{13}\text{C}$  NMR (100 MHz,  $\text{CDCl}_3$ )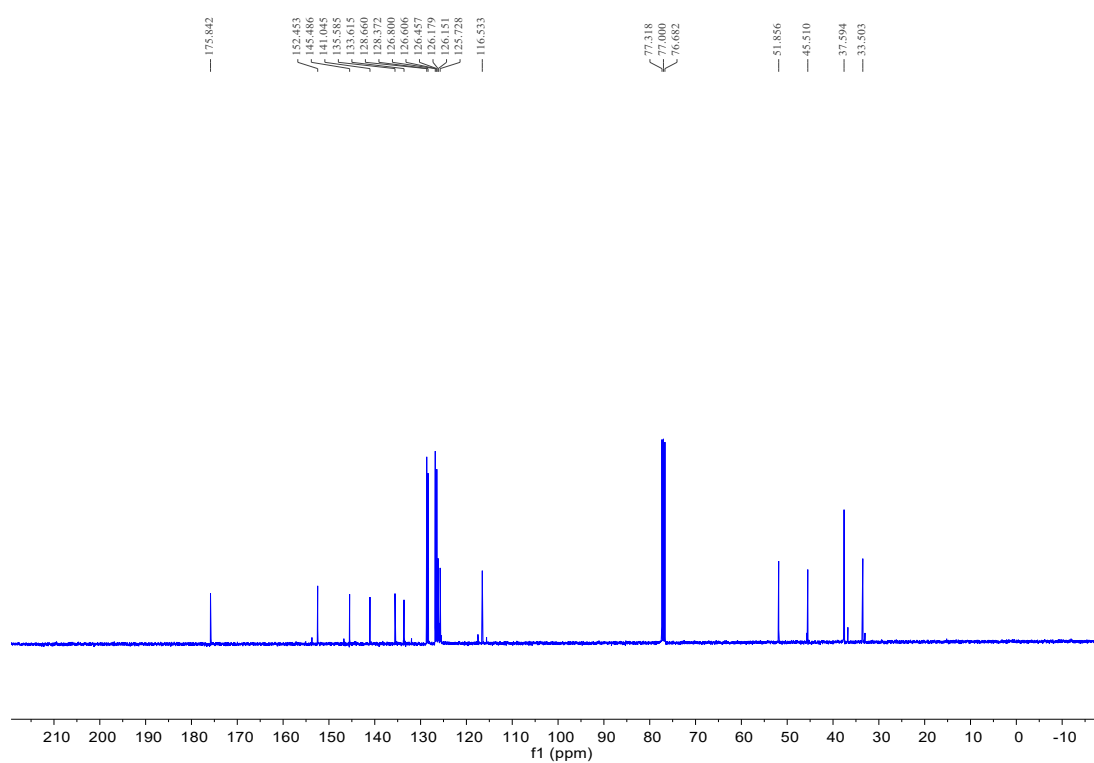



**$^1\text{H}$  and  $^{13}\text{C}$  NMR Spectra for Compound *cis*-3ap** $^1\text{H}$  NMR (400 MHz,  $\text{CDCl}_3$ )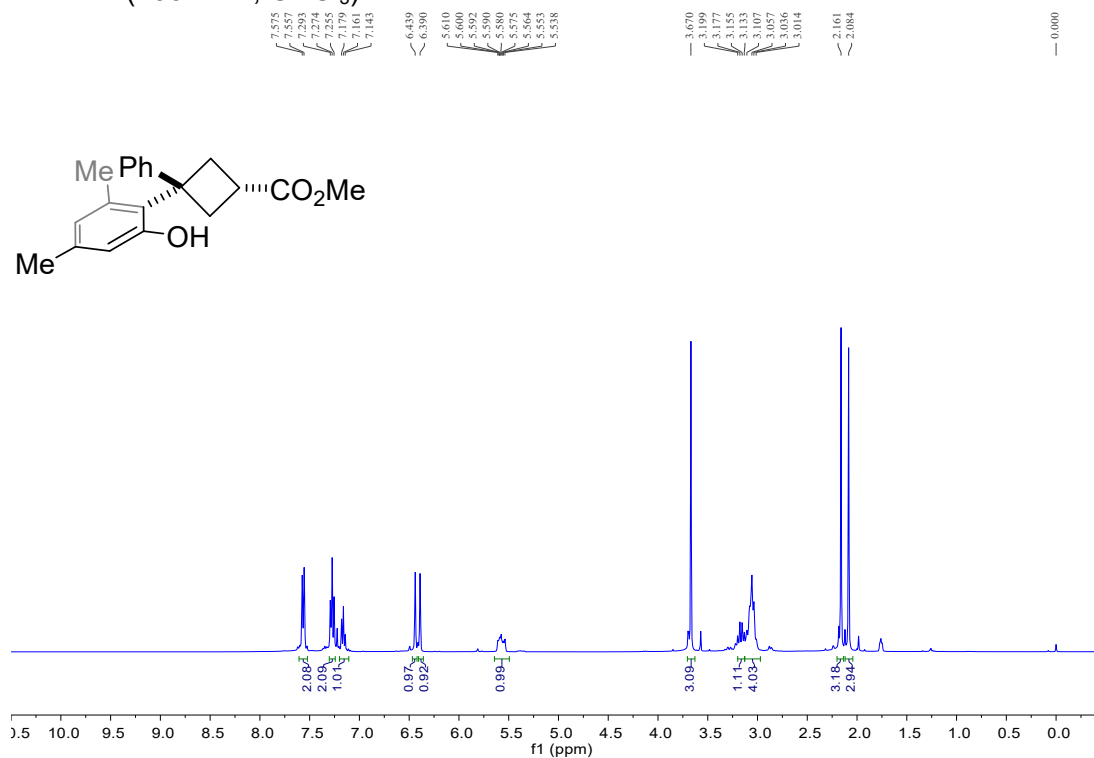 $^{13}\text{C}$  NMR (100 MHz,  $\text{CDCl}_3$ )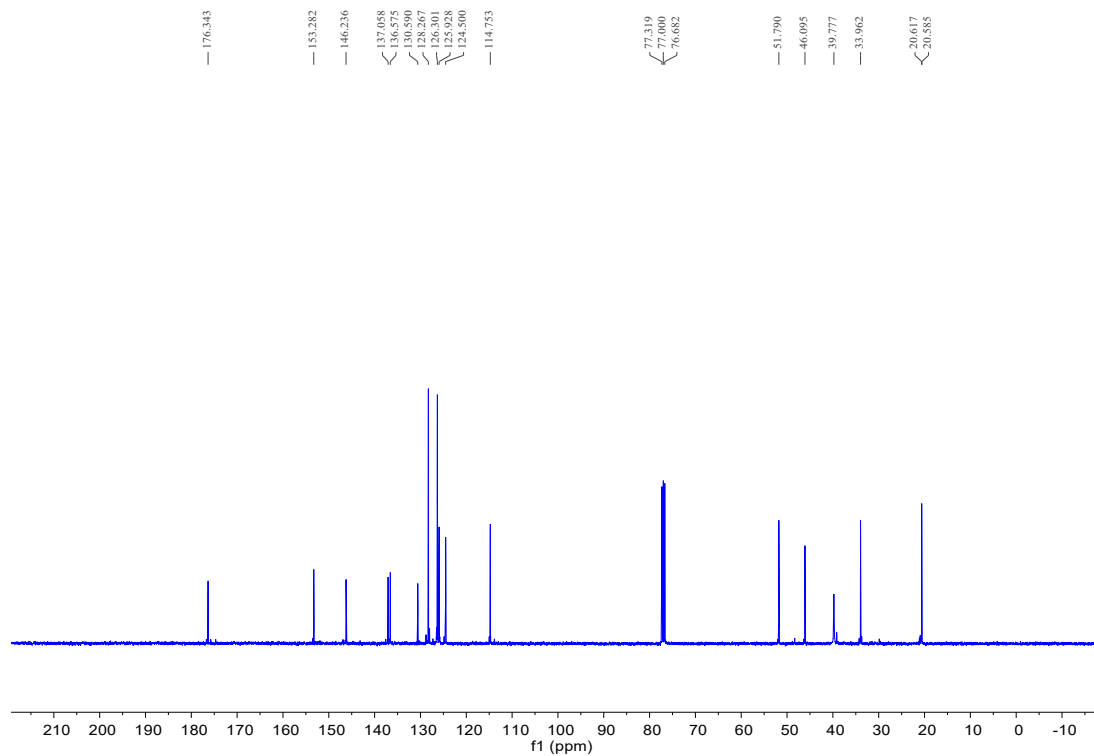

**$^1\text{H}$  and  $^{13}\text{C}$  NMR Spectra for Compound 5aa** $^1\text{H}$  NMR (400 MHz,  $\text{CDCl}_3$ ) for major isomer: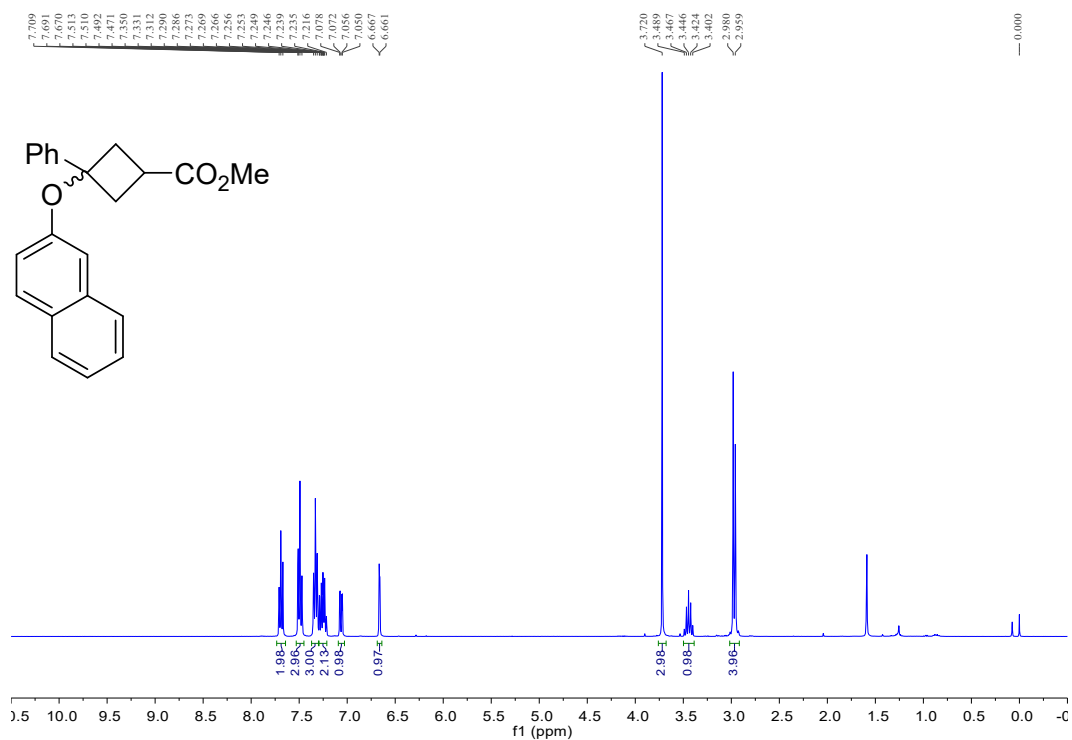 $^{13}\text{C}$  NMR (100 MHz,  $\text{CDCl}_3$ ) for major isomer: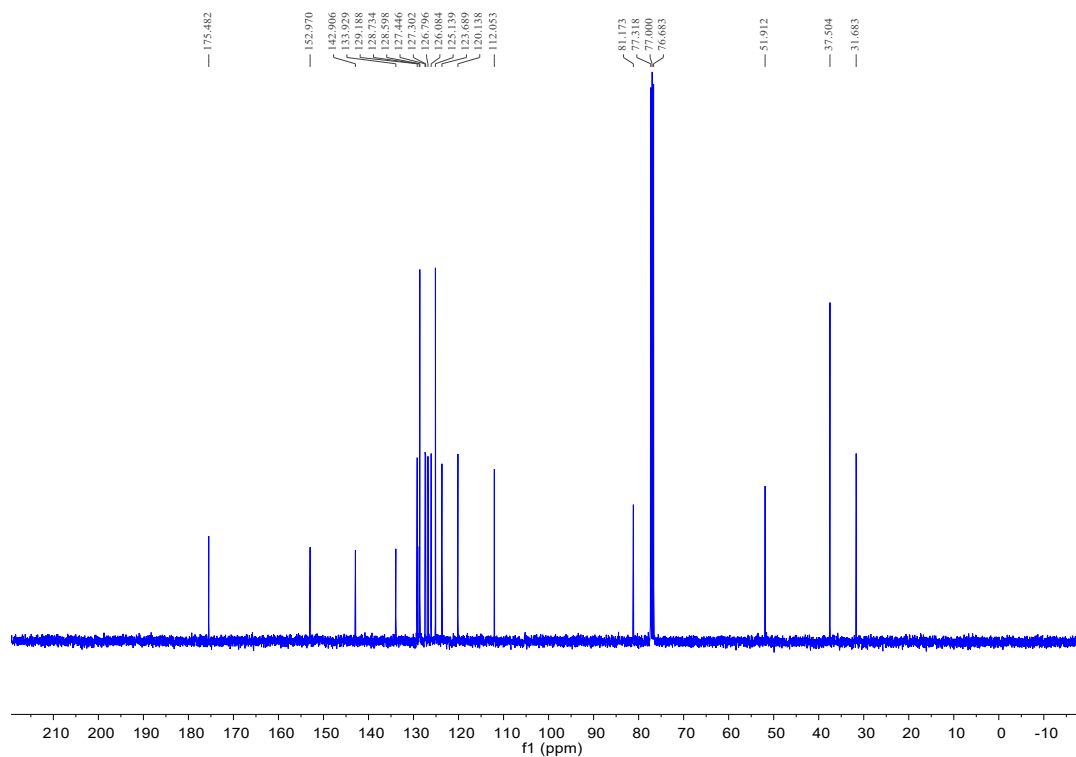

$^1\text{H}$  NMR (400 MHz,  $\text{CDCl}_3$ ) for **minor isomer**:

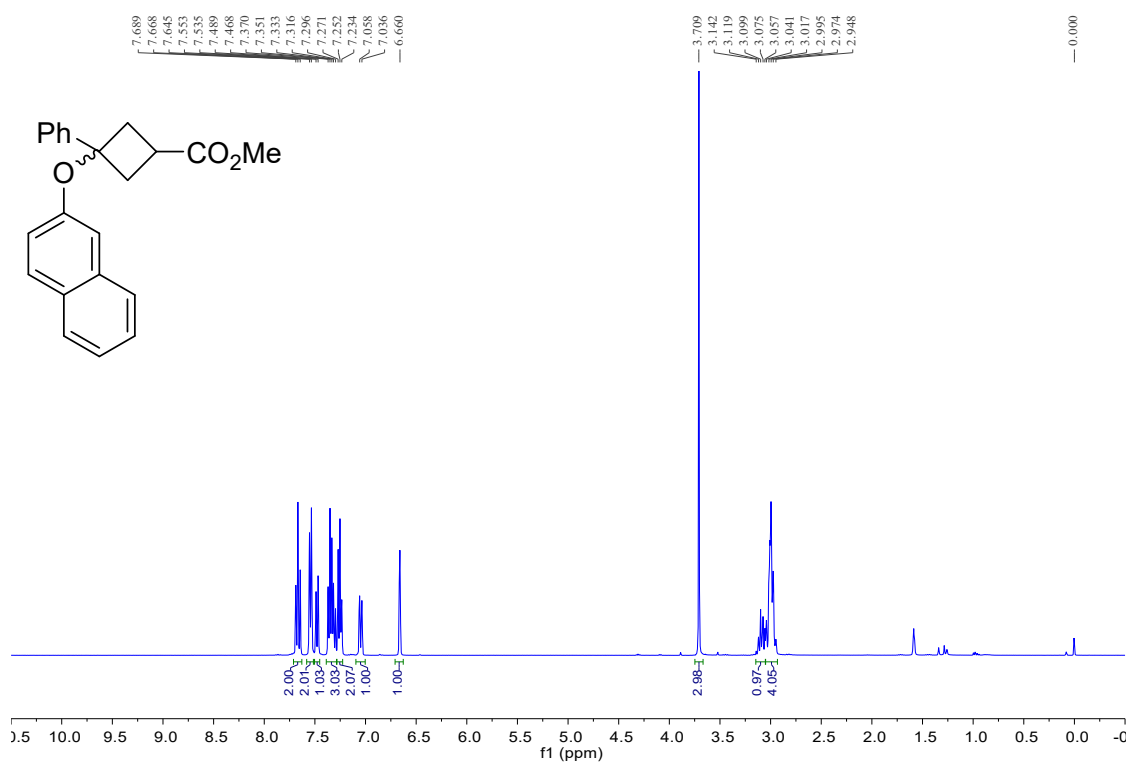

$^{13}\text{C}$  NMR (100 MHz,  $\text{CDCl}_3$ ) for **minor isomer**:

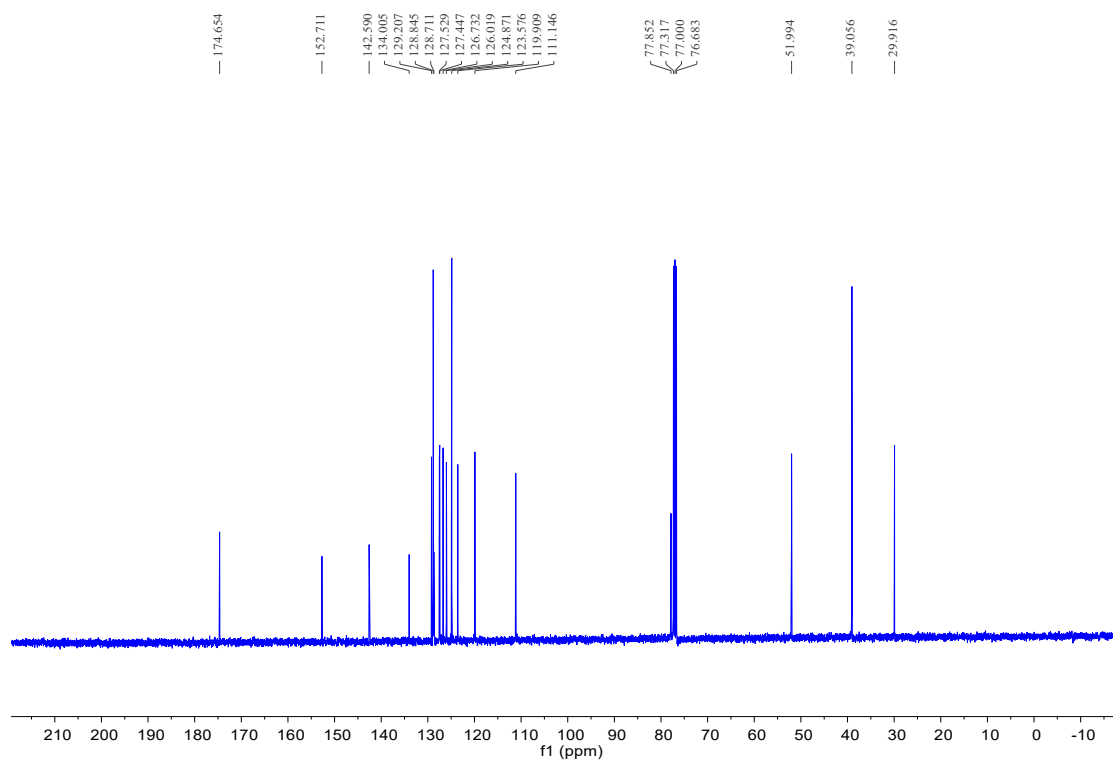

### $^1\text{H}$ , $^{13}\text{C}$ NMR and $^{19}\text{F}$ NMR Spectra for Compound 6

#### $^1\text{H}$ NMR (400 MHz, $\text{CDCl}_3$ )

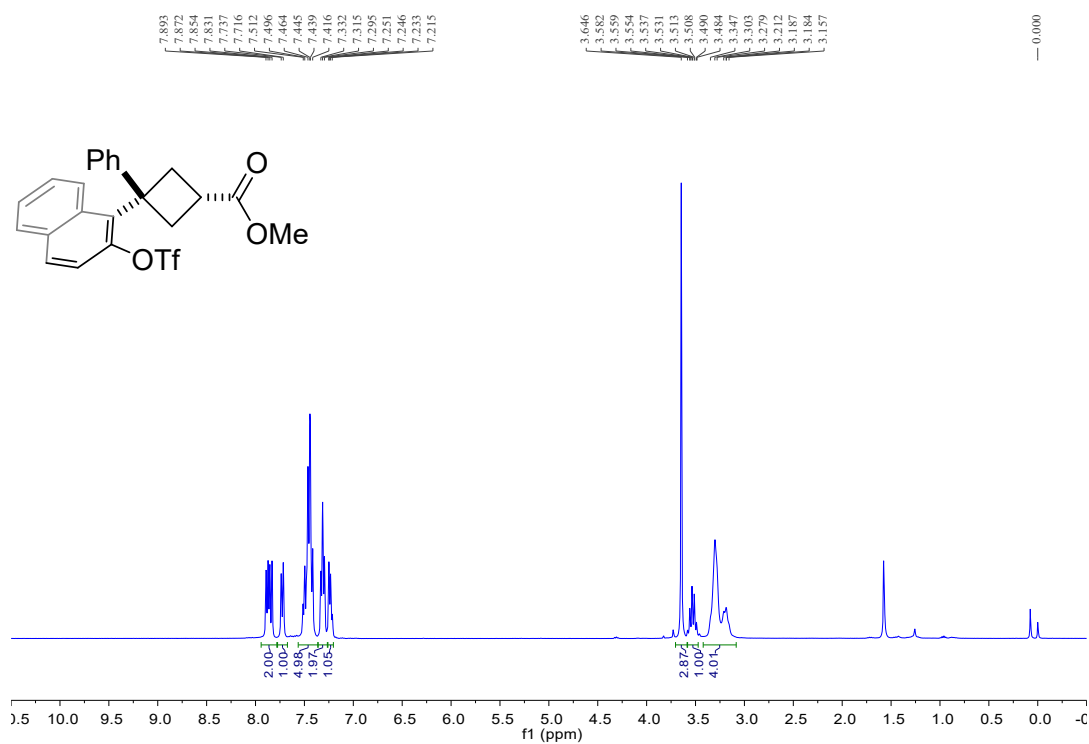

$^{13}\text{C}$  NMR (100 MHz,  $\text{CDCl}_3$ )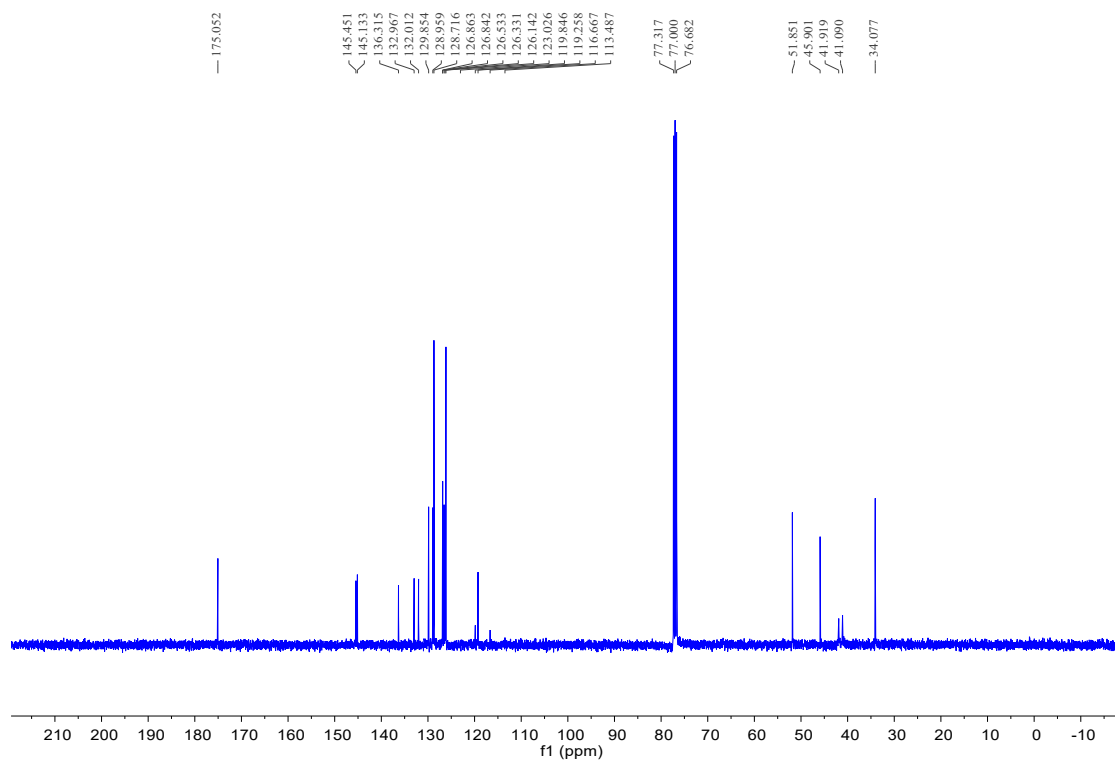 $^{19}\text{F}$  NMR (376 MHz,  $\text{CDCl}_3$ )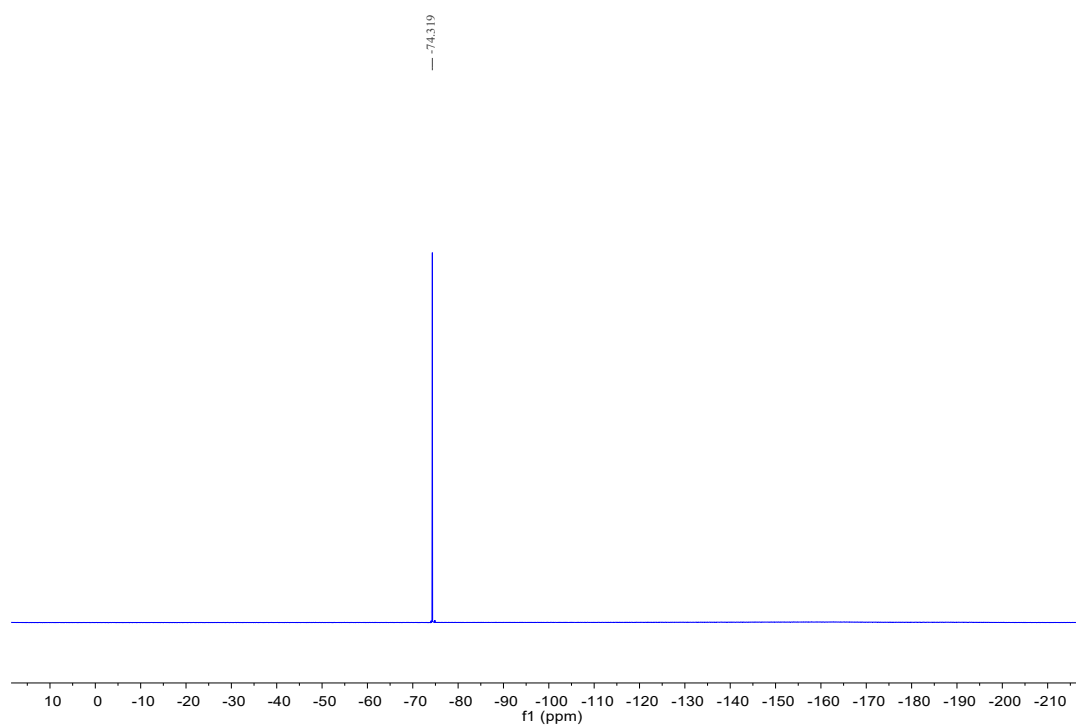 $^1\text{H}$ ,  $^{13}\text{C}$  NMR and  $^{31}\text{P}$  NMR Spectra for Compound 7

$^1\text{H}$  NMR (400 MHz,  $\text{CDCl}_3$ )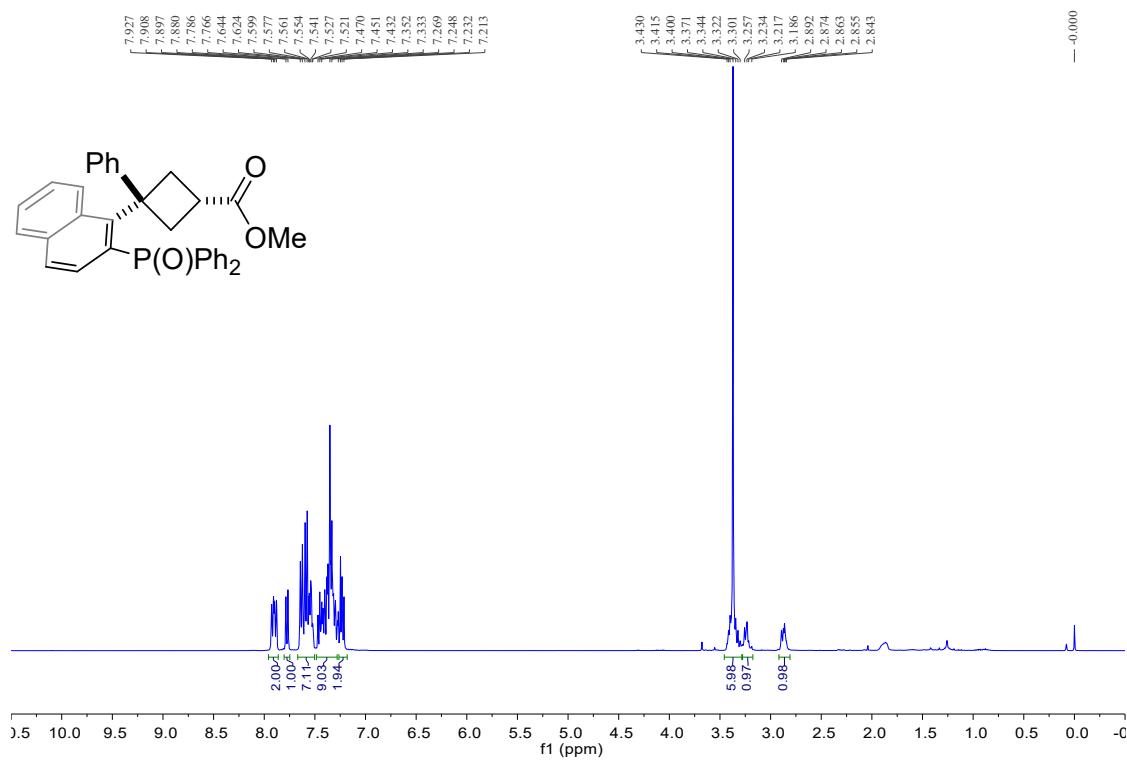 $^{13}\text{C}$  NMR (100 MHz,  $\text{CDCl}_3$ )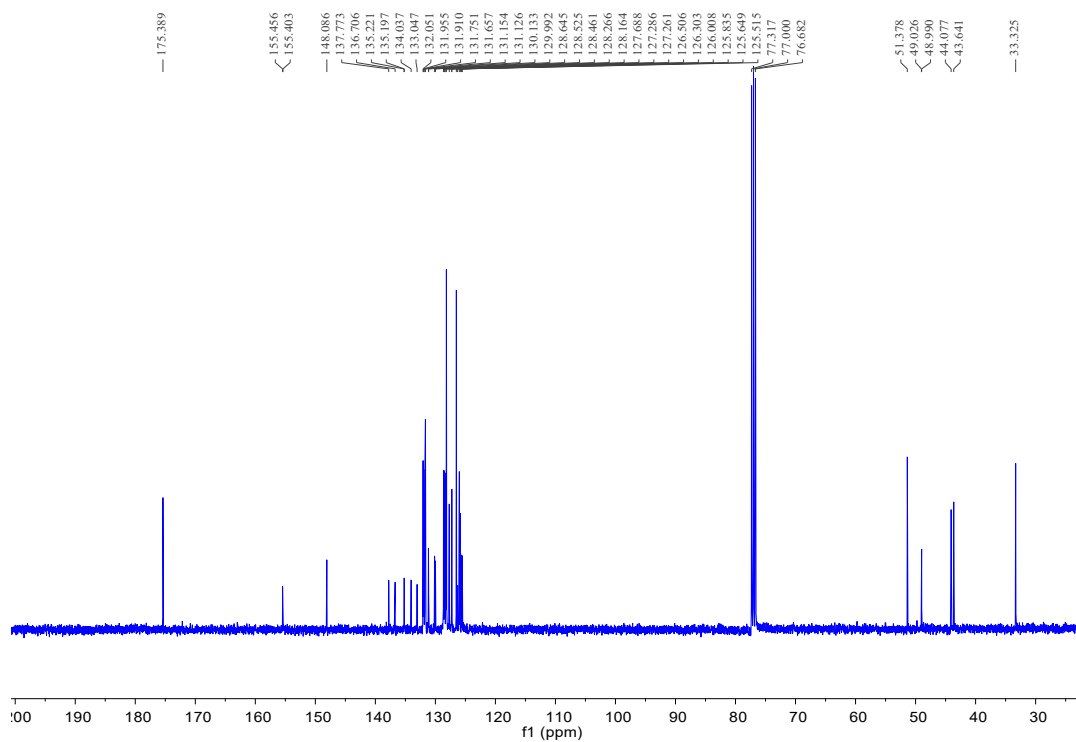

$^{31}\text{P}$  NMR (162 MHz,  $\text{CDCl}_3$ )

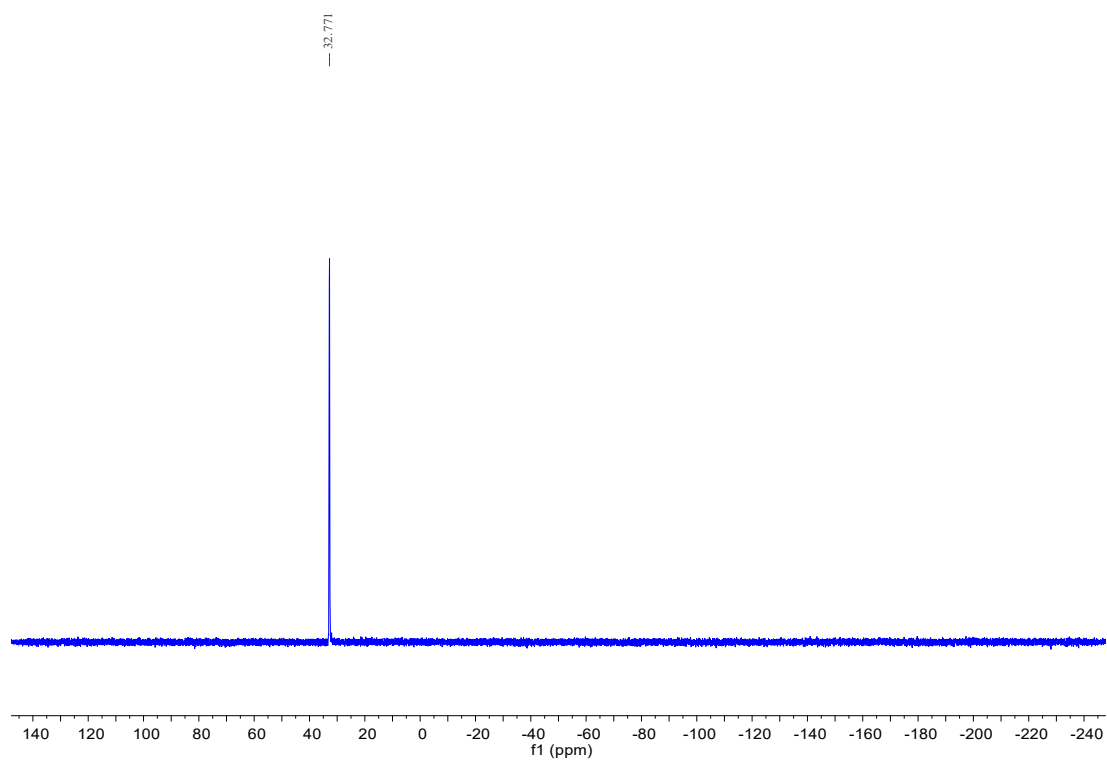

$^1\text{H}$  and  $^{13}\text{C}$  NMR Spectra for Compound 8

$^1\text{H}$  NMR (400 MHz,  $\text{CDCl}_3$ )

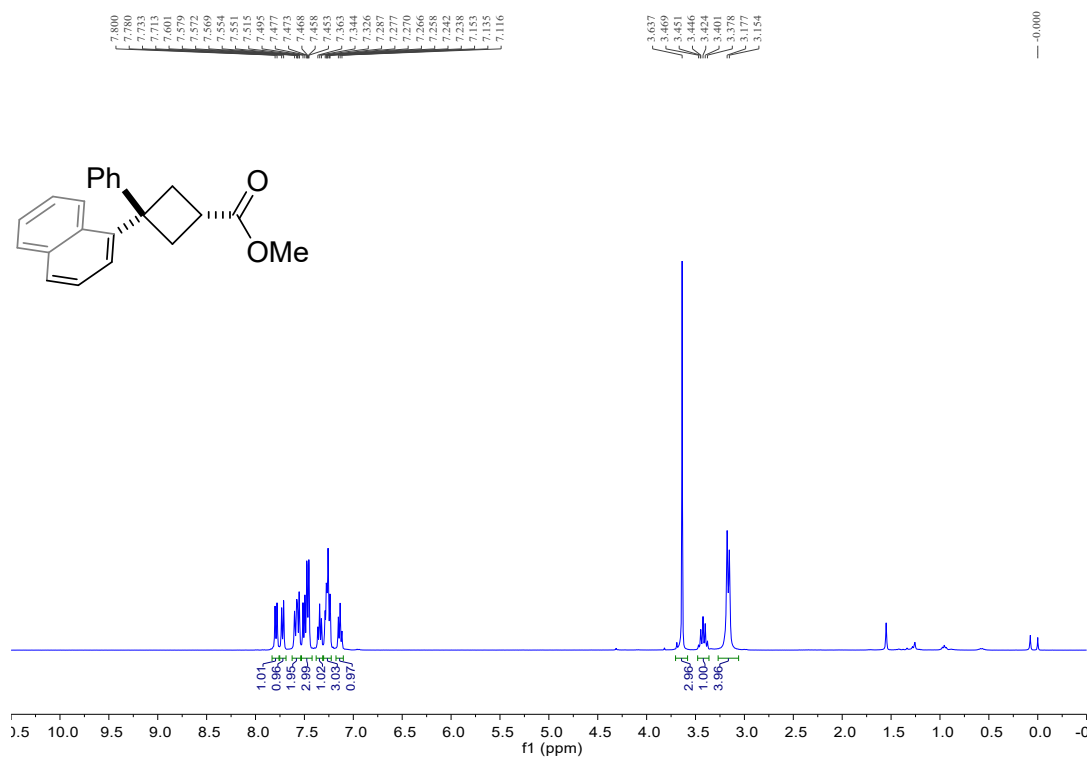**<sup>13</sup>C NMR (100 MHz, CDCl<sub>3</sub>)**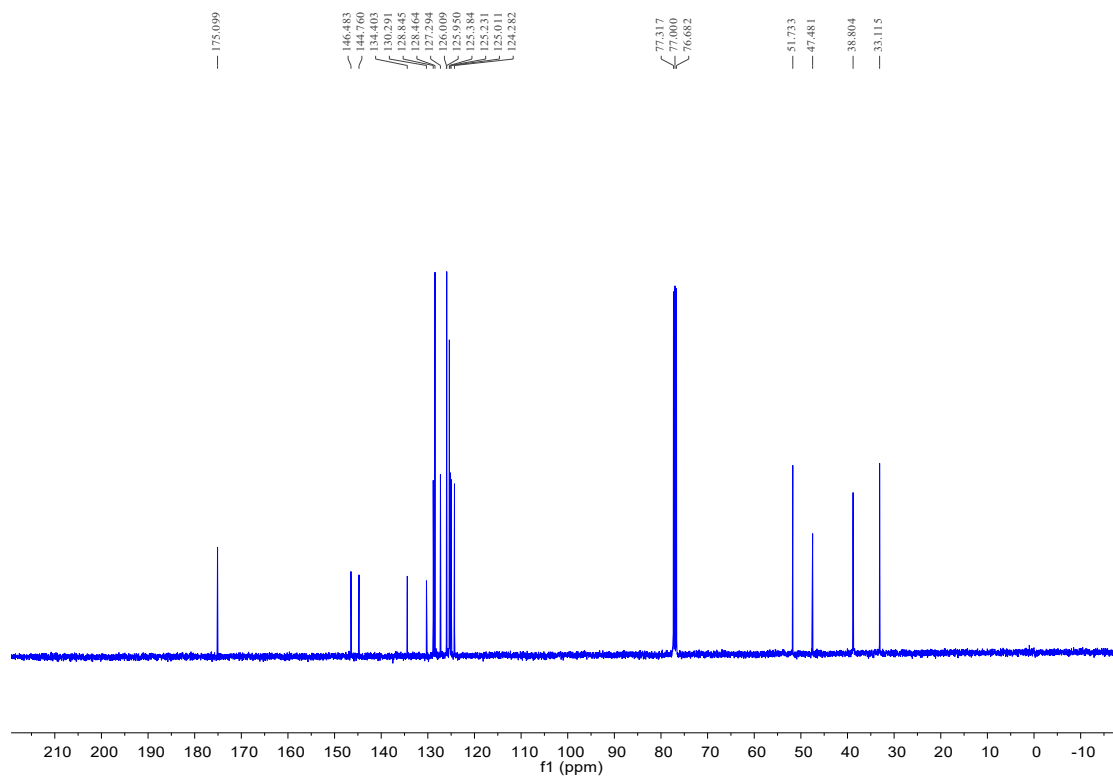**<sup>1</sup>H and <sup>13</sup>C NMR Spectra for Compound 9****<sup>1</sup>H NMR (400 MHz, CDCl<sub>3</sub>)**



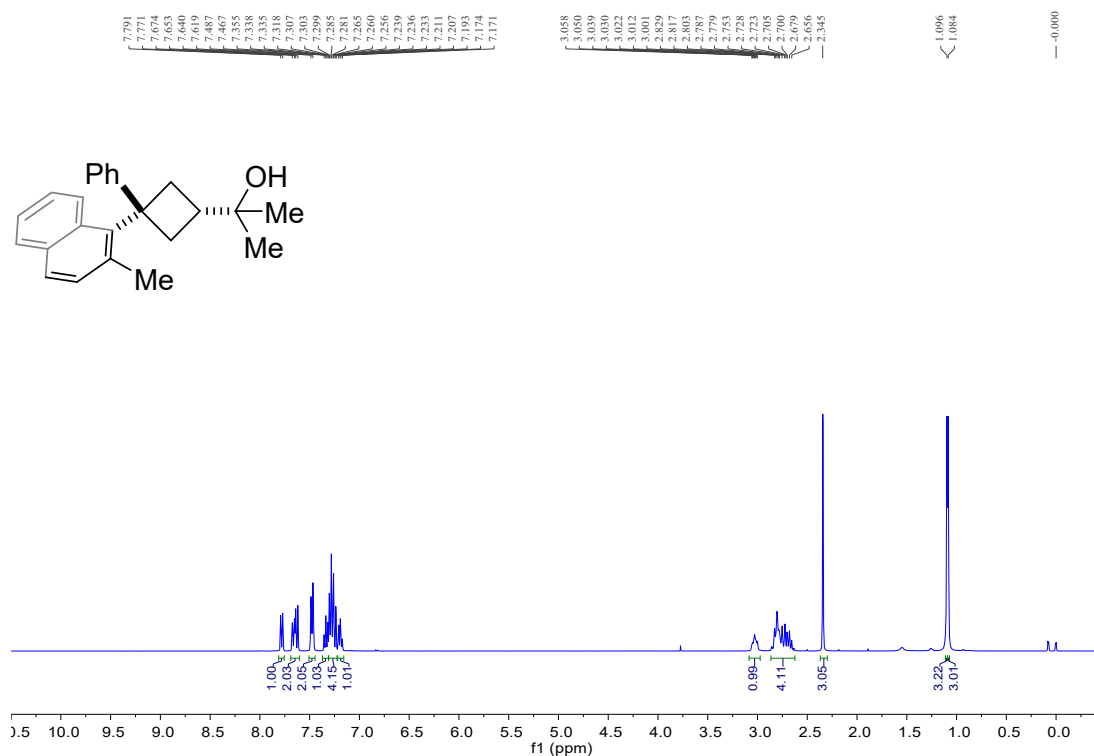**<sup>13</sup>C NMR (100 MHz, CDCl<sub>3</sub>)**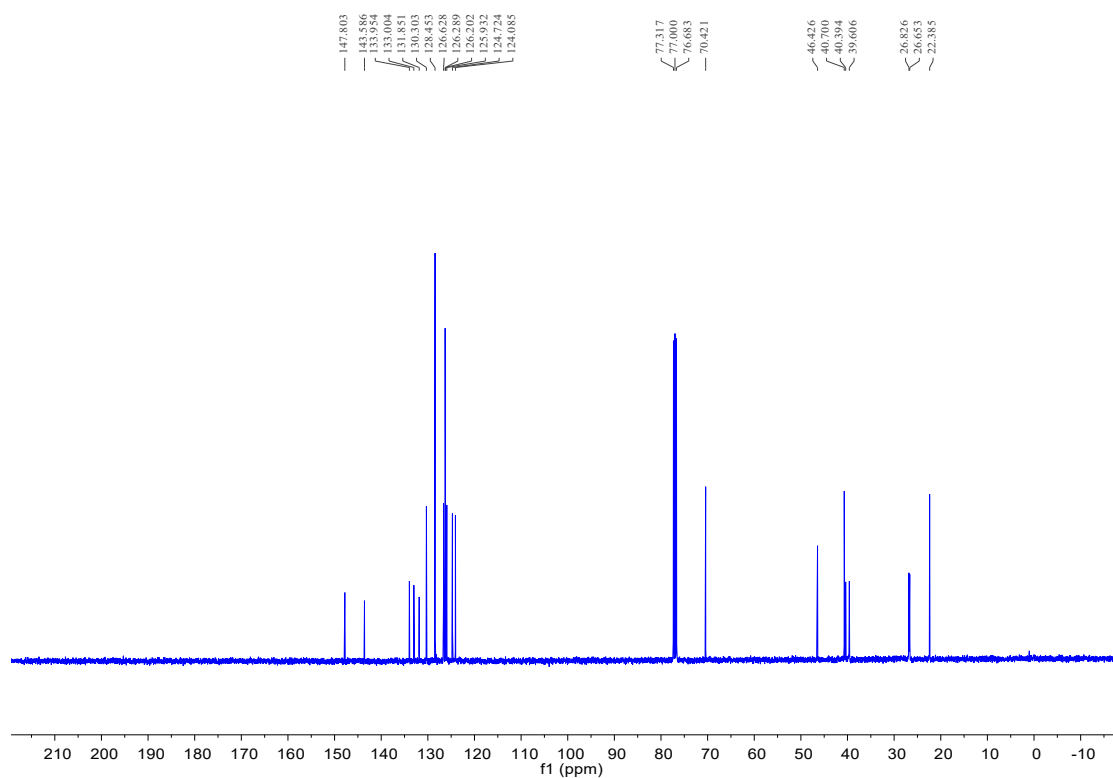**<sup>1</sup>H and <sup>13</sup>C NMR Spectra for Compound 10****<sup>1</sup>H NMR (400 MHz, CDCl<sub>3</sub>)**

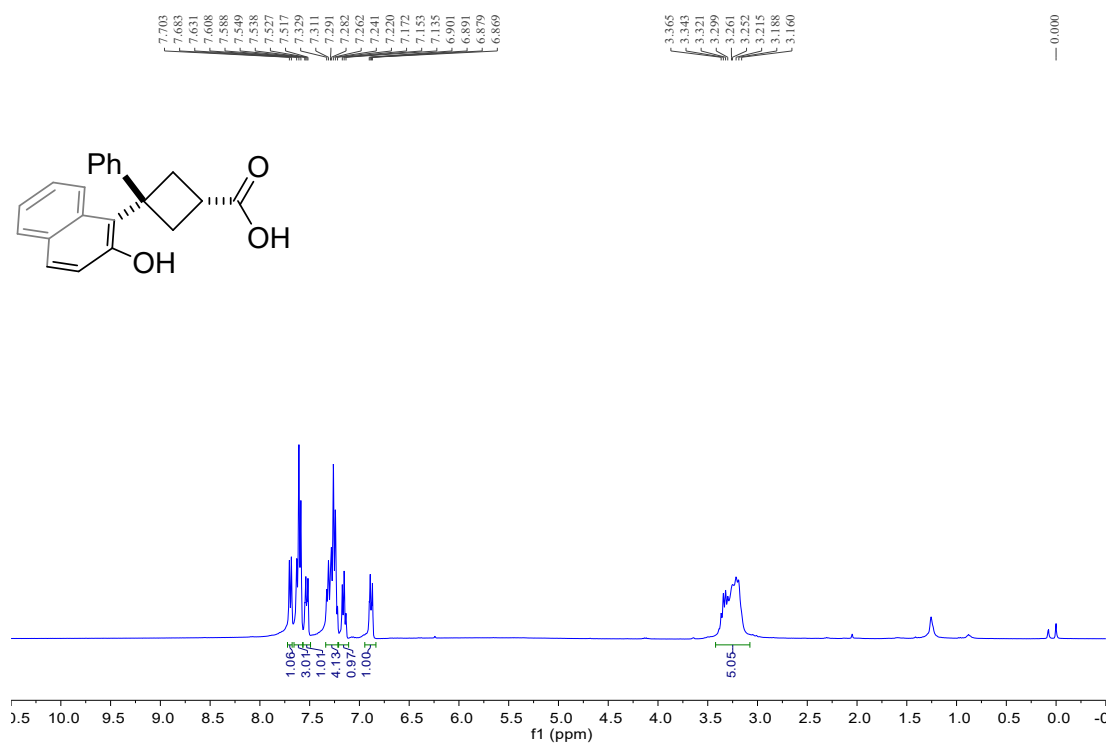

### <sup>13</sup>C NMR (100 MHz, CDCl<sub>3</sub>)

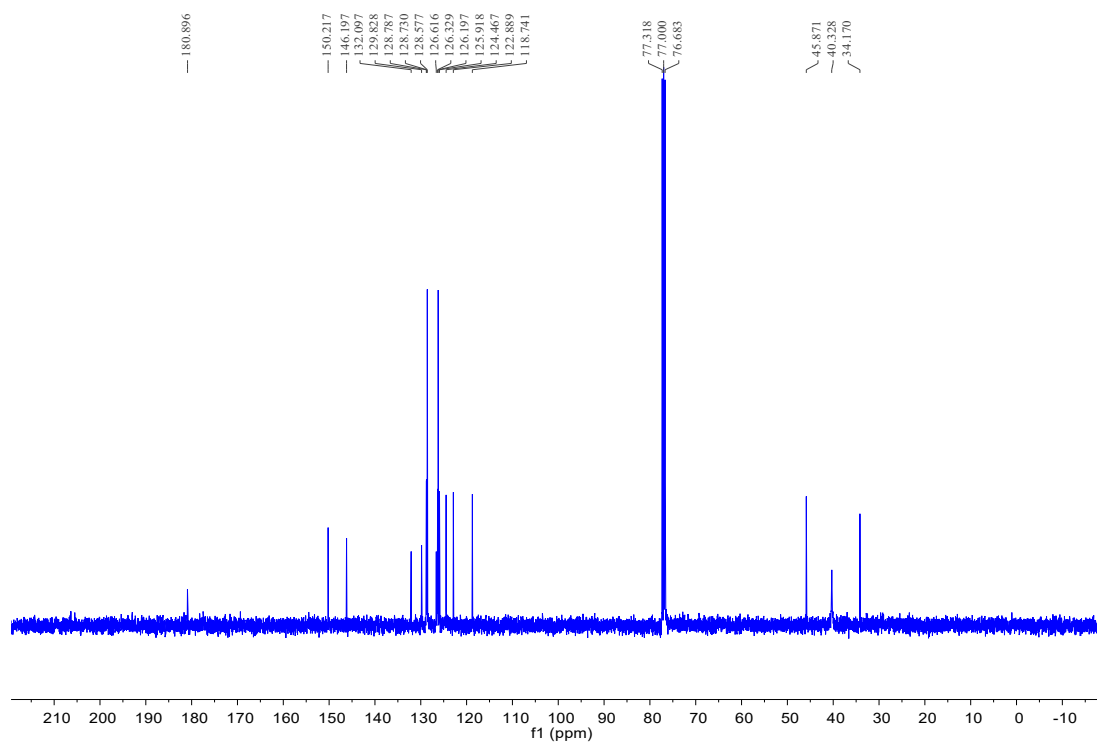

### <sup>1</sup>H and <sup>13</sup>C NMR Spectra for Compound 11

#### <sup>1</sup>H NMR (400 MHz, CDCl<sub>3</sub>)

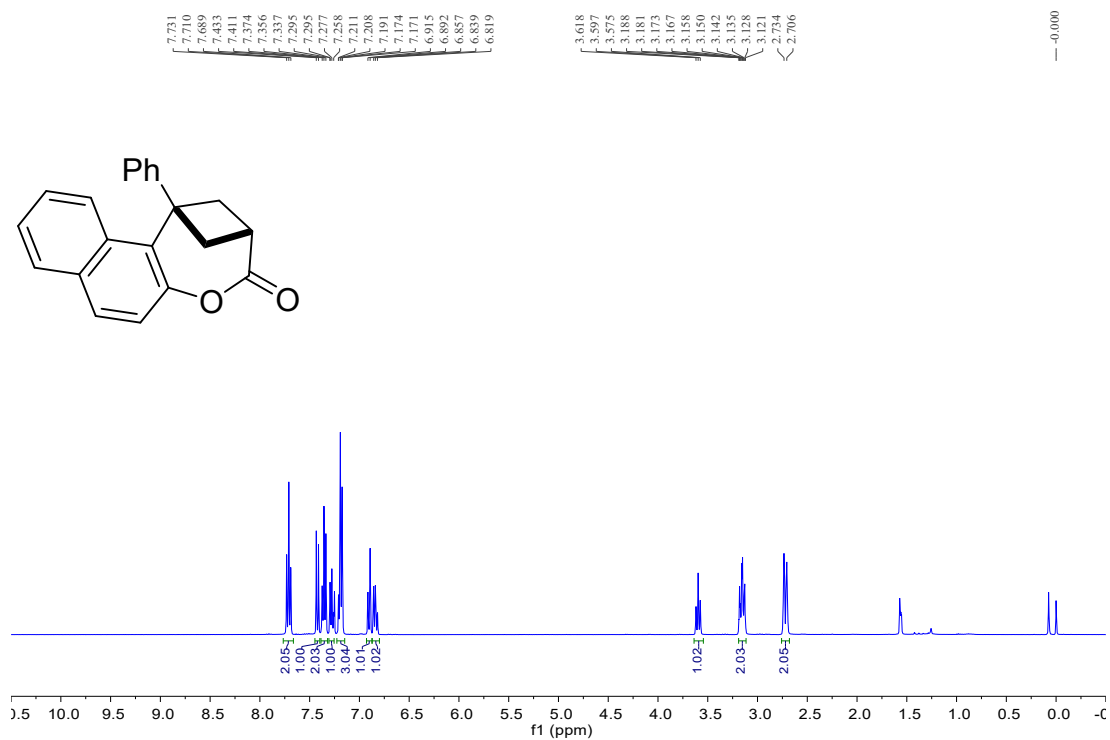**<sup>13</sup>C NMR (100 MHz, CDCl<sub>3</sub>)**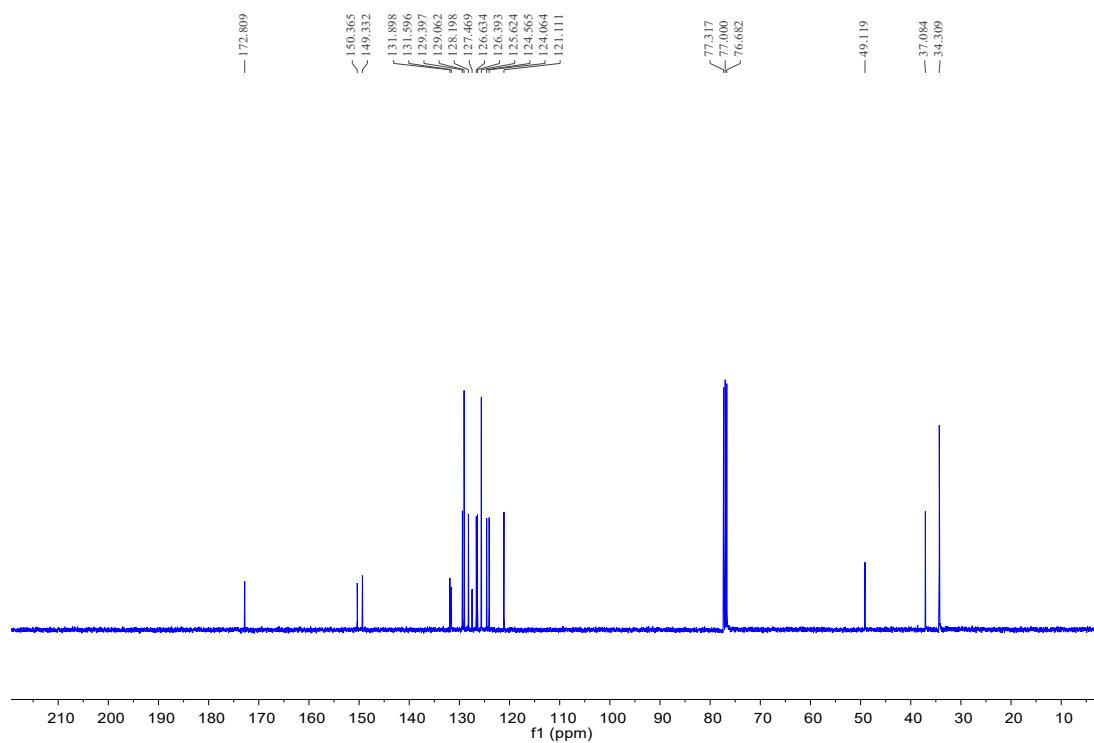**<sup>1</sup>H and <sup>13</sup>C NMR Spectra for Compound 12****<sup>1</sup>H NMR (400 MHz, Methanol-*d*<sub>4</sub>)**

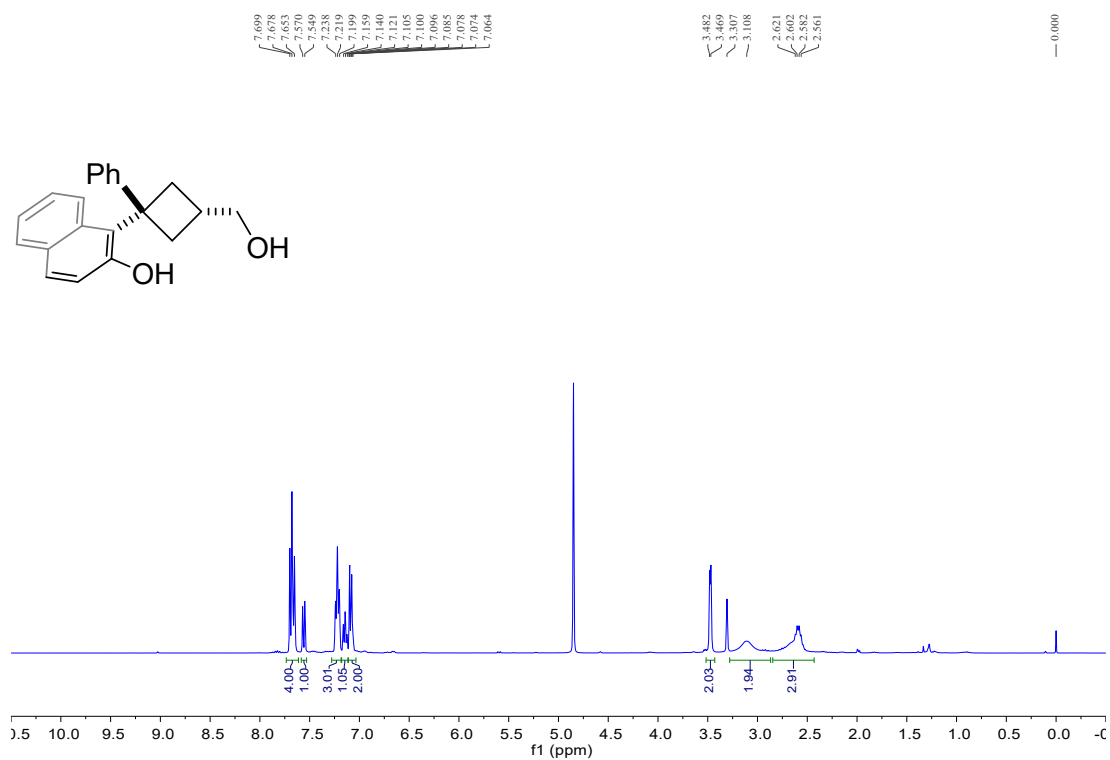**<sup>13</sup>C NMR (100 MHz, CDCl<sub>3</sub>)**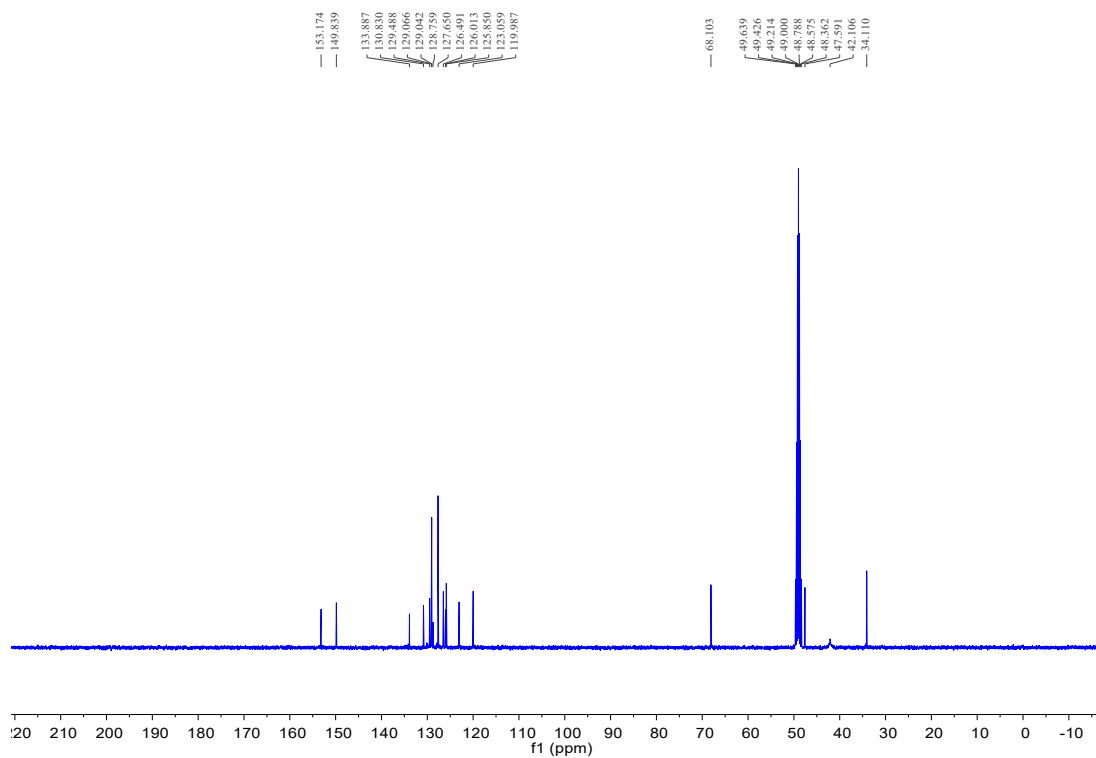**<sup>1</sup>H and <sup>13</sup>C NMR Spectra for Compound 13****<sup>1</sup>H NMR (400 MHz, CDCl<sub>3</sub>)**

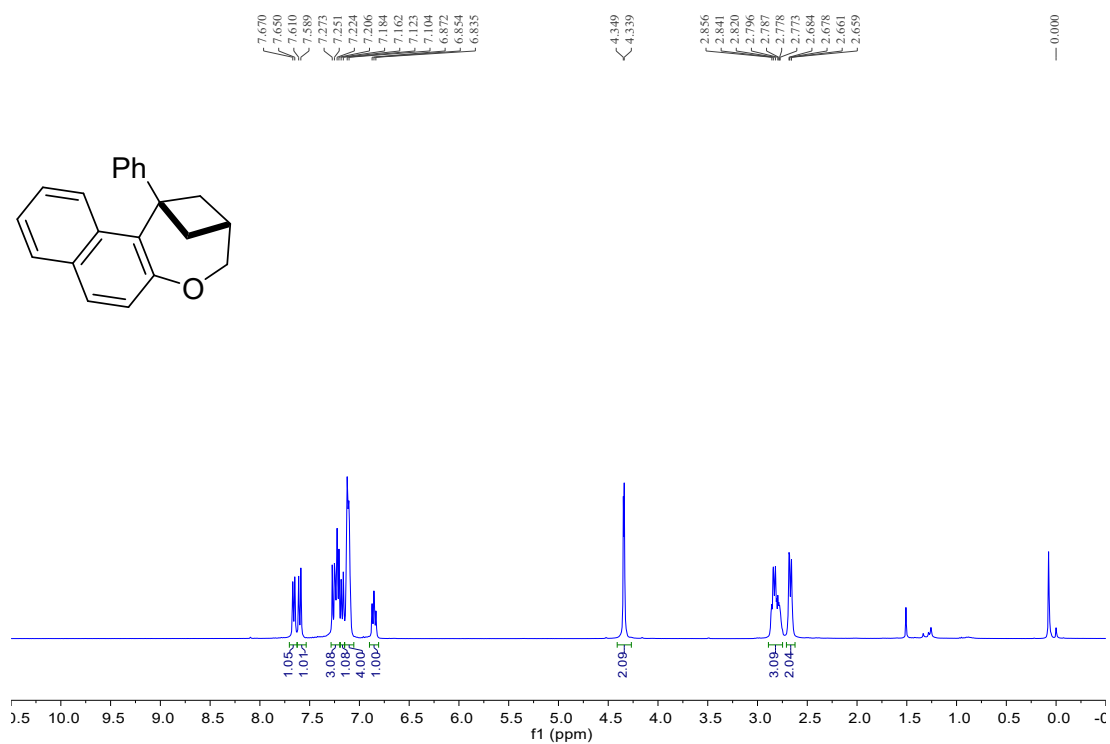**<sup>13</sup>C NMR (100 MHz, CDCl<sub>3</sub>)**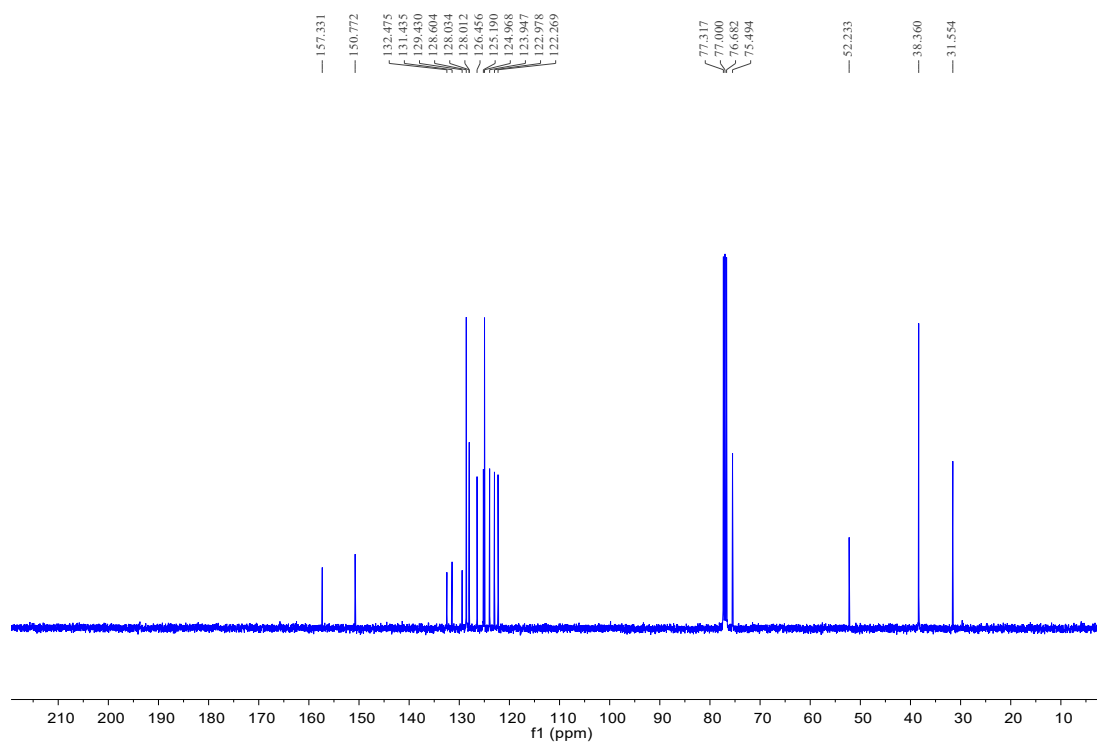**11 DFT Studies**

All calculations were performed by using the Gaussian 16 package.<sup>[7]</sup> All

geometries were optimized in the gas phase at B3LYP-D3(BJ)<sup>[8]</sup>/BS1 level, where BS1 represents a basis set of SDD<sup>[9]</sup> for Ag atom, and 6-31G(d, p)<sup>[10]</sup> for all other elements. For all optimized structures, vibrational frequency calculations were performed at the same level of theory to ensure that every optimized structure has no imaginary frequency and that all the optimized transition state has only one imaginary frequency. The energies were improved by single-point energy calculations at the level of B3LYP-D3(BJ)/def2-TZVP<sup>[12]</sup> including solvation effects with the SMD<sup>[11]</sup> continuum solvation model for toluene. The thermodynamic quantities, such as concentration (1 mol/L) and temperature (373.15 K), were evaluated using the GoodVibes code<sup>[13]</sup>. All the energies discussed are Gibbs free energies at 373.15K with solvation effects considered. Quasi-rigid-rotor-harmonic-oscillator approximations were employed in GoodVibes, with a frequency cutoff of 100 cm<sup>-1</sup>.<sup>[14,15]</sup> Molecular visualizations were conducted using CYLview<sup>[16]</sup> and PyMOL<sup>[17]</sup>.

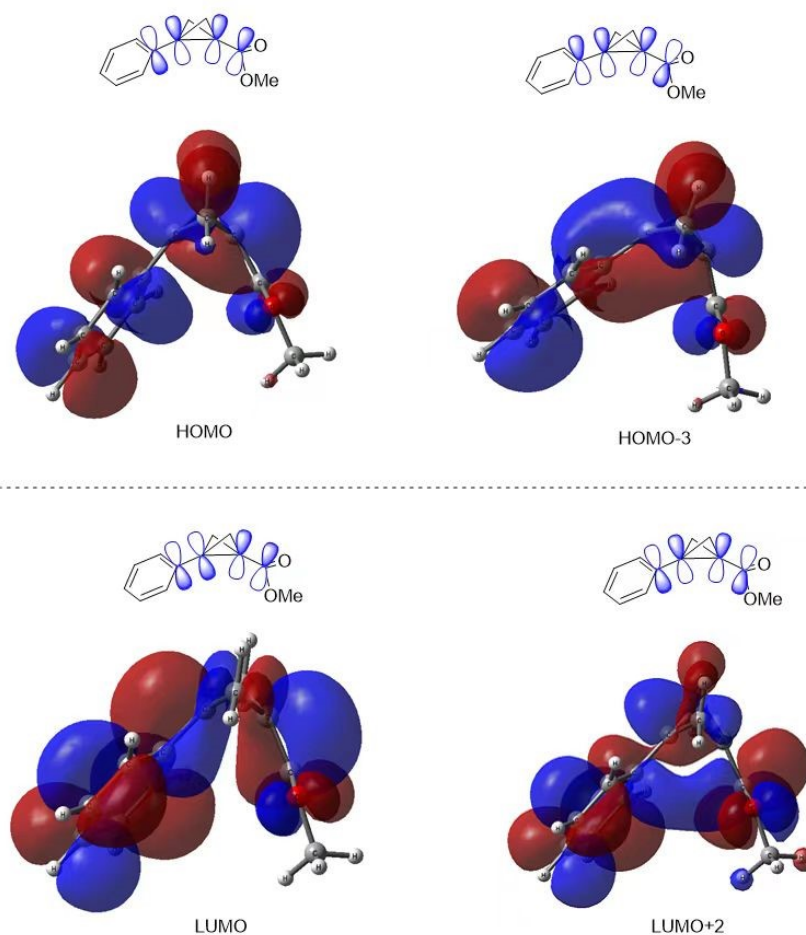

**Figure S1.** Molecular orbital analysis of 1a.

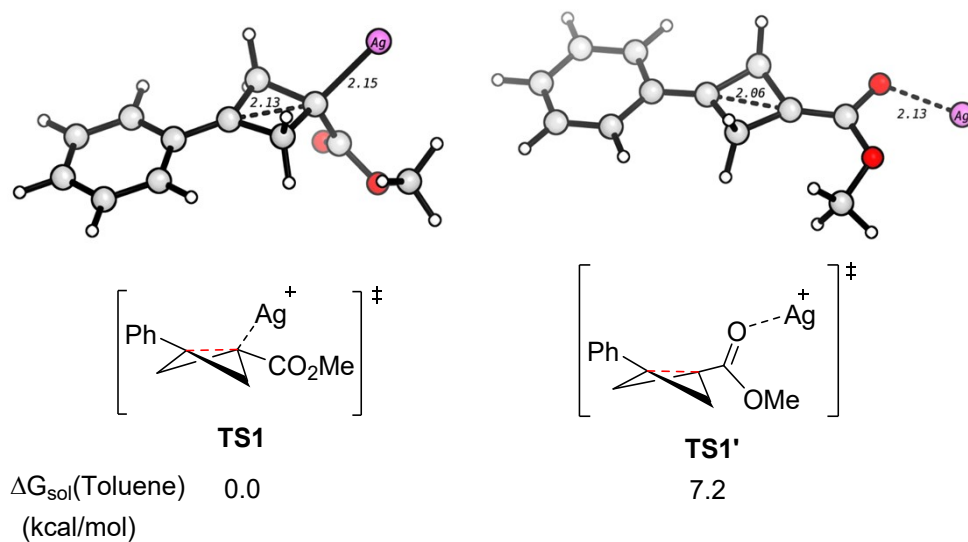

**Figure S2.** Comparison of two activation modes of the ring-opening step.

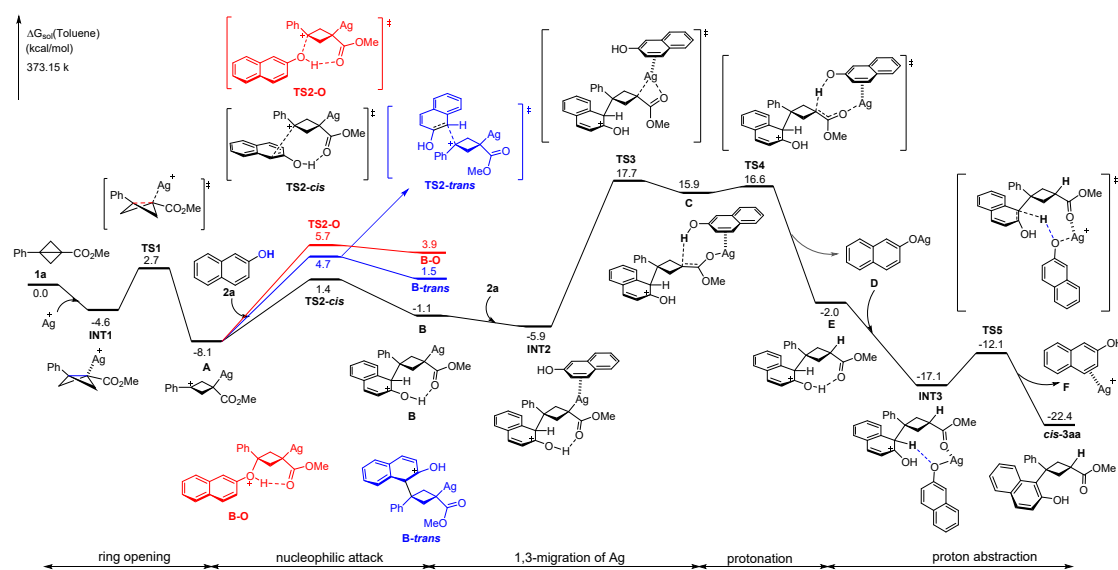

**Figure S3.** Calculated free energy profile of the catalytic cycle.

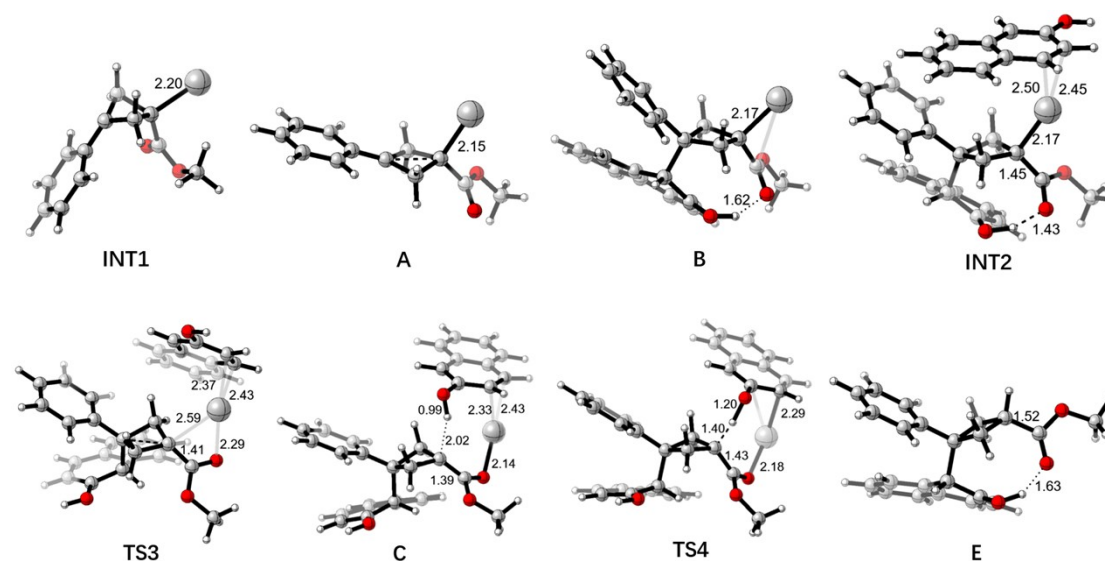

**Figure S4.** Optimized geometries of key stationary points in Figure S3.

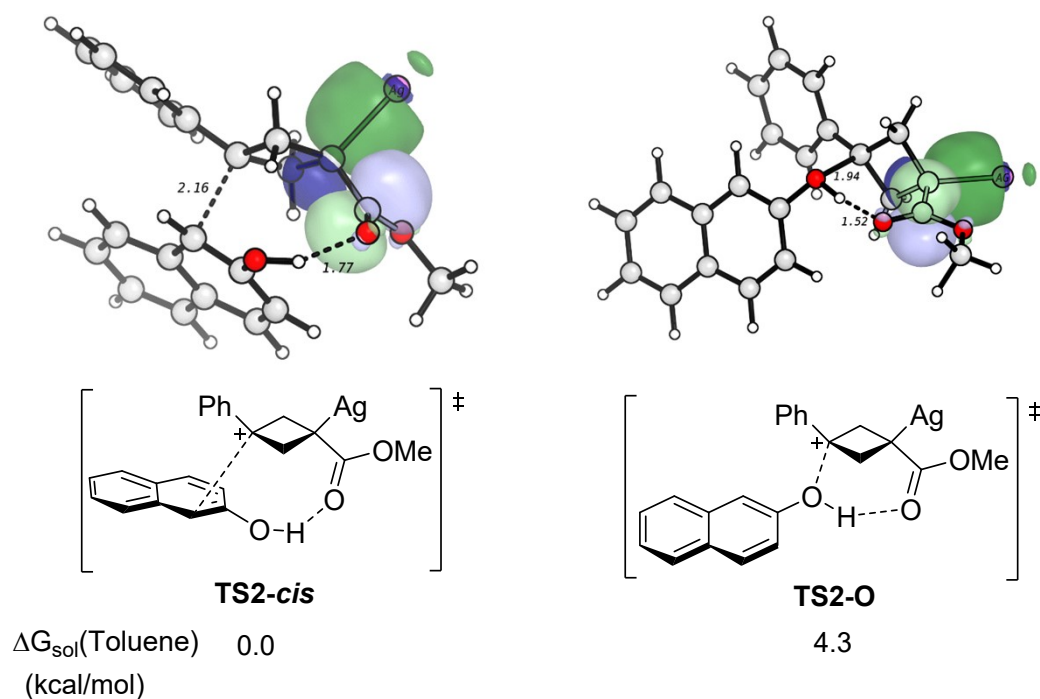

**Figure S5.** NBO orbital analysis of two transition states of nucleophilic attack.

The analysis using the NBO module of the Gaussian software, based on second-order perturbation theory, reveals that the primary stabilizing factor for the stable C-Ag bond in TS2-*cis* is the C-Ag  $\rightarrow$  LP\* C orbital interaction (Figure S4), where C-Ag bond acts as the donor and empty p orbital of C as the acceptor. This effect lower the energy by 36 kcal/mol. This suggests that the negative charge of the carbon-silver bond will be somewhat delocalized. However, in the transition state involving oxygen attack, the presence of strong hydrogen bonding leads to the orthogonality of the corresponding



orbitals, resulting in the loss of this stabilizing effect and consequently an unstable C-Ag bond.

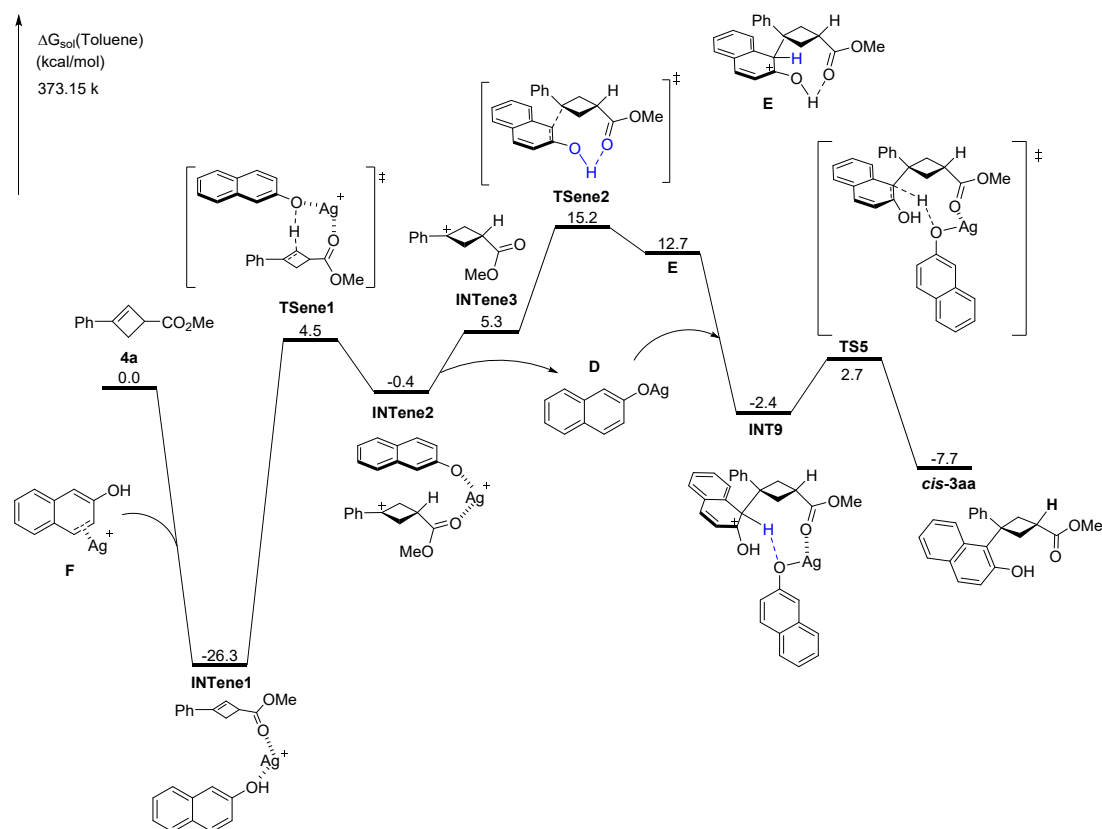

**Figure S6.** The reaction pathway for the conversion of a byproduct cyclobutene to the main product.

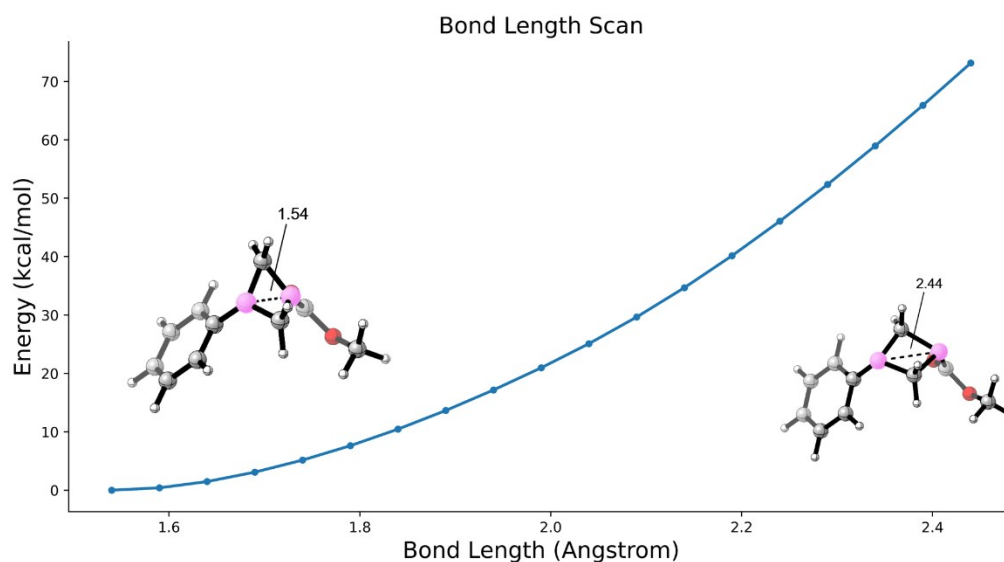

**Figure S7.** The calculated potential energy surface (PES) scanned by varying the bridging C-C bond of **1a**.

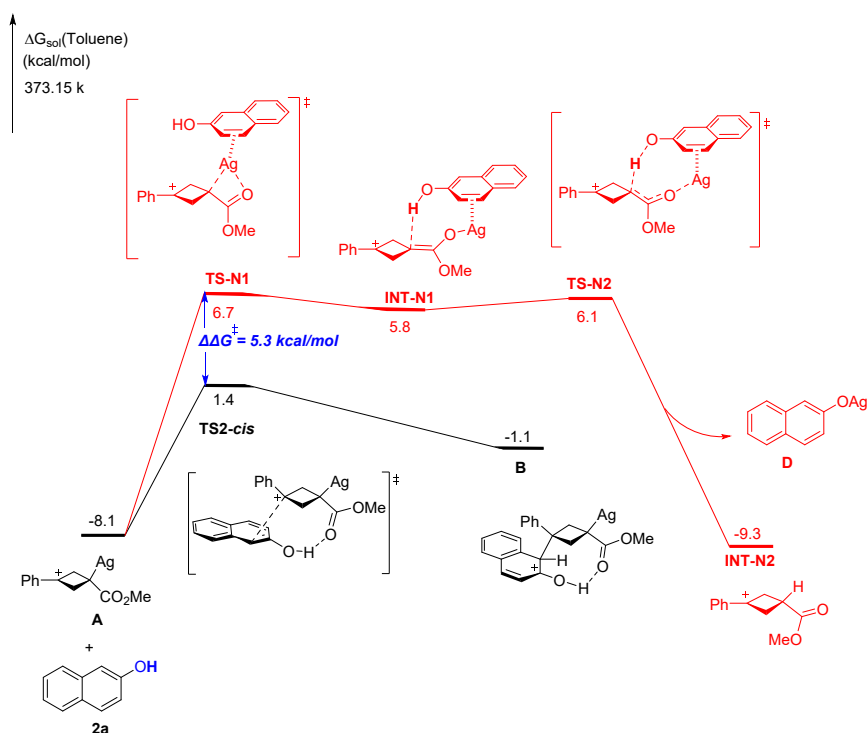

**Figure S8.** Calculated energy free profiles for the comparison of nucleophilic attack and protonation pathways.

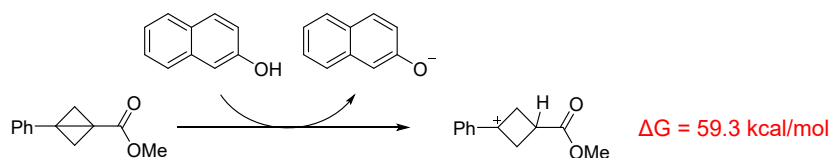

**Figure S9.** Calculated reaction energy of the direct protonation step.

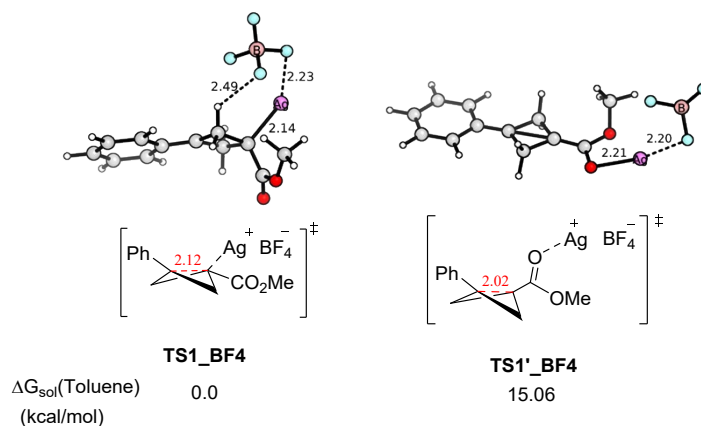

**Figure S10.** Comparison of two activation modes of the ring-opening step with  $\text{BF}_4^-$  included.

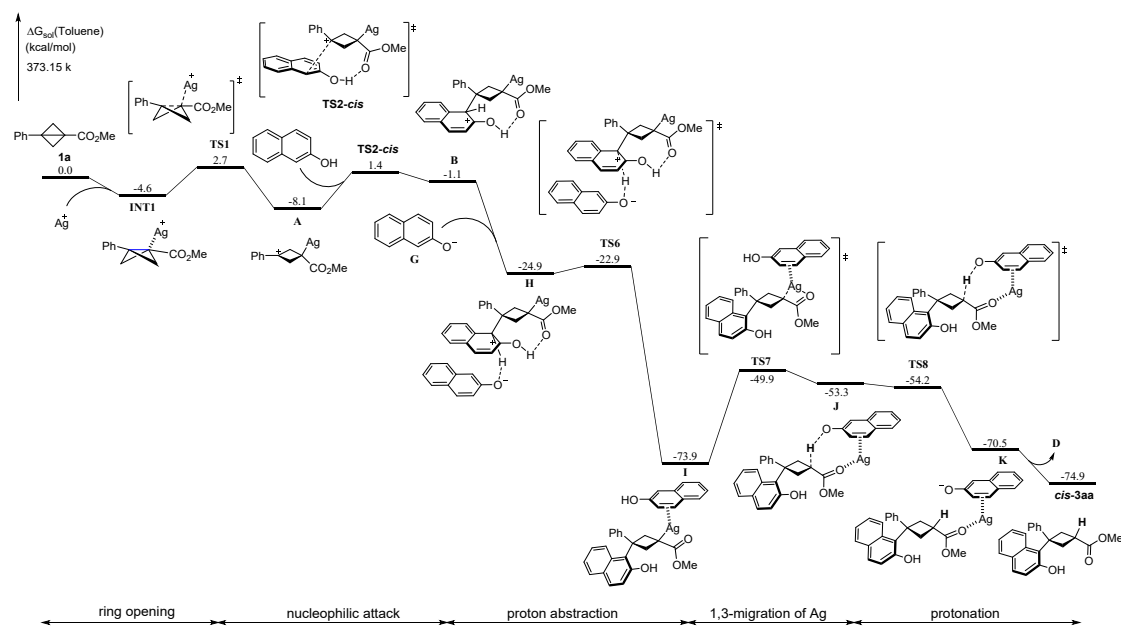

**Figure S11.** Calculated energy profile of another possible pathway with the proton abstraction step occurring prior to the protonation step.

We have performed calculations on another possible reaction pathway, in which the proton abstraction step occurs prior to the protonation step after the formation of **B** (see Figure S11). Thermodynamically, this appears to be a reasonable pathway, which drives the energy profile downhill significantly because of the charge neutralization and aromatization (from **B** to **I**). However, our system is acidic, which lacks additional base anion to facilitate the deprotonation process. The naphthol anion moiety **G** could only be generated in the protonation step (**TS4** in Figure S3 or **TS8** in Figure S11). Before the protonation step, the concentration of naphthol anion in the system could be neglected. As the reaction goes on, the concentration of naphthol anion **G** should still be very low when comparing to that of the substrate **2a**. Therefore, we don't think that the reaction pathway shown in Figure S11 is the major mechanism. Eventhough we could not completely exclud the reaction pathway of Figure S11, the samll amount of **G** formed during the reaction process would not change the major mechanism, because the key steps in Figure S3 and Figure S11 are similar to each other despite the exact suequences. In addition, the energy barriers for the rate-determining step in

both scenarios are very close to each other (23.6 kcal/mol (**TS3**) in Figure S3 and 24.0 kcal/mol (**TS7**) in Figure S11, respectively).

**Cartesian coordinates:**

65

Name: TS5 Energy: -1057225.5621585

|   |         |          |          |
|---|---------|----------|----------|
| C | 3.49627 | 0.06660  | -0.14401 |
| C | 4.20779 | -1.23870 | 0.08296  |
| C | 1.74630 | 2.51311  | -0.62854 |
| C | 2.45214 | 0.54194  | 0.90368  |
| C | 1.53540 | 1.04424  | -0.26309 |
| C | 2.36309 | 0.09736  | -1.19803 |
| C | 1.53519 | 2.92439  | -1.95311 |
| C | 1.65644 | 4.26381  | -2.31541 |
| C | 1.99114 | 5.22190  | -1.35661 |
| C | 2.19724 | 4.82684  | -0.03649 |
| C | 2.07283 | 3.48373  | 0.32414  |
| O | 3.66826 | -2.34661 | 0.24594  |
| O | 5.51770 | -1.11703 | 0.08844  |
| C | 6.30530 | -2.31896 | 0.29754  |
| H | 2.81532 | 1.26474  | 1.63336  |
| H | 1.89358 | -0.88152 | -1.31059 |
| H | 2.62428 | 0.47063  | -2.18696 |
| H | 1.27191 | 2.19182  | -2.70938 |
| H | 1.49422 | 4.55918  | -3.34734 |
| H | 2.09030 | 6.26535  | -1.63746 |
| H | 2.45503 | 5.56231  | 0.71898  |
| H | 2.22380 | 3.20802  | 1.36115  |

---

|    |          |          |          |
|----|----------|----------|----------|
| H  | 7.34024  | -1.98636 | 0.26589  |
| H  | 6.06261  | -2.75641 | 1.26704  |
| H  | 6.09948  | -3.03833 | -0.49638 |
| Ag | 1.50392  | -2.60404 | 0.42706  |
| H  | 1.99646  | -0.29622 | 1.43849  |
| C  | -0.93478 | 2.45364  | 3.14007  |
| C  | -0.20674 | 1.79321  | 2.16200  |
| C  | -0.75022 | 1.54987  | 0.88860  |
| C  | -2.08549 | 1.98990  | 0.64737  |
| C  | -2.81316 | 2.66182  | 1.65826  |
| C  | -2.24654 | 2.89653  | 2.89303  |
| H  | -0.09636 | -0.38639 | 0.34173  |
| H  | -0.48523 | 2.62404  | 4.11318  |
| H  | 0.78942  | 1.45066  | 2.40076  |
| C  | -0.00549 | 0.78104  | -0.14288 |
| C  | -2.69780 | 1.72007  | -0.60554 |
| H  | -3.83009 | 2.97640  | 1.44462  |
| H  | -2.80521 | 3.40824  | 3.66899  |
| C  | -2.04712 | 1.01283  | -1.58465 |
| C  | -0.72376 | 0.59139  | -1.38404 |
| H  | -3.71732 | 2.05298  | -0.77109 |
| H  | -2.54539 | 0.78051  | -2.52112 |
| O  | -0.07820 | -0.04585 | -2.37436 |
| H  | -0.68837 | -0.22454 | -3.10512 |
| H  | 4.24100  | 0.84039  | -0.32895 |
| C  | -6.42214 | -1.01194 | -0.90695 |
| C  | -5.40706 | -1.73693 | -1.49218 |

---

|   |          |          |          |
|---|----------|----------|----------|
| C | -4.13283 | -1.82676 | -0.87696 |
| C | -3.91928 | -1.17068 | 0.38103  |
| C | -4.98646 | -0.42988 | 0.95787  |
| C | -6.20738 | -0.34923 | 0.32592  |
| H | -3.21744 | -3.05652 | -2.40773 |
| H | -7.39235 | -0.94719 | -1.38872 |
| H | -5.57024 | -2.24712 | -2.43741 |
| C | -3.04949 | -2.53062 | -1.47181 |
| C | -2.64140 | -1.22519 | 0.98069  |
| H | -4.81906 | 0.07146  | 1.90684  |
| H | -7.01600 | 0.21826  | 0.77590  |
| C | -1.58742 | -1.84655 | 0.33772  |
| C | -1.80353 | -2.52961 | -0.89159 |
| H | -2.45734 | -0.71261 | 1.91868  |
| H | -0.96299 | -3.03512 | -1.36177 |
| O | -0.33587 | -1.65324 | 0.82857  |

65

Name: TS4 Energy: -1057194.0253775

|   |          |          |          |
|---|----------|----------|----------|
| C | 0.06163  | -1.34645 | -1.11358 |
| C | -0.12024 | -2.55978 | -0.36932 |
| C | 2.44577  | 1.19727  | -1.22314 |
| C | 0.35385  | -0.06897 | -0.30546 |
| C | 1.82039  | -0.11294 | -0.82810 |
| C | 1.34135  | -1.11244 | -1.93109 |
| C | 3.17046  | 1.32348  | -2.41511 |
| C | 3.79899  | 2.52536  | -2.74013 |
| C | 3.71197  | 3.61814  | -1.87508 |

---

|    |          |          |          |
|----|----------|----------|----------|
| C  | 2.98147  | 3.50638  | -0.69139 |
| C  | 2.35078  | 2.30369  | -0.36942 |
| O  | -0.84861 | -2.67908 | 0.66519  |
| O  | 0.50990  | -3.64116 | -0.84426 |
| C  | 0.17619  | -4.91429 | -0.25440 |
| H  | 0.16641  | -0.07048 | 0.76878  |
| H  | 1.12623  | -0.56962 | -2.85587 |
| H  | 1.97069  | -1.97178 | -2.16009 |
| H  | 3.23487  | 0.47978  | -3.09568 |
| H  | 4.34707  | 2.61325  | -3.67311 |
| H  | 4.19703  | 4.55481  | -2.13021 |
| H  | 2.89421  | 4.35745  | -0.02304 |
| H  | 1.77936  | 2.22377  | 0.55027  |
| H  | 0.44859  | -4.93218 | 0.80263  |
| H  | -0.89294 | -5.11170 | -0.35567 |
| H  | 0.75426  | -5.64862 | -0.81310 |
| Ag | -2.67048 | -1.48161 | 0.53833  |
| H  | -0.13306 | 0.80885  | -0.73312 |
| C  | -3.92445 | -0.66160 | -1.18957 |
| C  | -4.74314 | 0.00337  | -0.26461 |
| C  | -4.50881 | 1.36345  | 0.07300  |
| C  | -3.42973 | 2.04827  | -0.58348 |
| C  | -2.60045 | 1.35313  | -1.49853 |
| C  | -2.79010 | 0.00663  | -1.80772 |
| H  | -6.14136 | 1.53281  | 1.48208  |
| H  | -4.21810 | -1.62915 | -1.59276 |
| H  | -5.61998 | -0.49931 | 0.13627  |

---

|   |          |          |          |
|---|----------|----------|----------|
| C | -5.32282 | 2.06167  | 1.00152  |
| C | -3.21650 | 3.41832  | -0.26993 |
| H | -1.78618 | 1.88096  | -1.98661 |
| C | -4.02238 | 4.06806  | 0.63736  |
| C | -5.08598 | 3.38810  | 1.28116  |
| H | -2.40725 | 3.94667  | -0.76558 |
| H | -3.84861 | 5.11633  | 0.85986  |
| H | -5.71531 | 3.91904  | 1.98754  |
| O | -1.96986 | -0.68632 | -2.57904 |
| H | -1.04926 | -1.09594 | -1.92484 |
| C | 5.10469  | 0.00231  | 0.03751  |
| C | 4.87550  | 0.74223  | 1.18077  |
| C | 3.73555  | 0.53811  | 2.01371  |
| C | 2.74706  | -0.39351 | 1.60257  |
| C | 2.78992  | -0.95332 | 0.21849  |
| C | 4.13163  | -0.90322 | -0.39211 |
| H | 4.39299  | 1.88748  | 3.56876  |
| H | 6.02400  | 0.12445  | -0.52678 |
| H | 5.62265  | 1.46423  | 1.49801  |
| C | 3.63356  | 1.17058  | 3.27187  |
| C | 1.72349  | -0.72808 | 2.48830  |
| H | 2.38605  | -1.96879 | 0.18675  |
| C | 1.64591  | -0.10819 | 3.73756  |
| C | 2.58744  | 0.85626  | 4.12410  |
| H | 0.99191  | -1.48113 | 2.21183  |
| H | 0.84904  | -0.38476 | 4.42058  |
| H | 2.50918  | 1.33504  | 5.09392  |



O 4.30085 -1.68344 -1.44524

H 5.15381 -1.51773 -1.87983

65

Name: TS3 Energy: -1057196.0449226

C -0.43105 1.84883 0.62772

C -0.83013 2.69006 -0.43576

C 2.18238 -0.23134 1.62654

C -0.03781 0.39021 0.40570

C 1.41820 0.77511 0.80918

C 0.80810 2.06043 1.48260

C 2.91536 0.14773 2.75725

C 3.65386 -0.79536 3.47262

C 3.66873 -2.13056 3.06448

C 2.93263 -2.51949 1.94395

C 2.19280 -1.57597 1.23094

O -1.67978 2.35163 -1.32733

O -0.28851 3.92723 -0.46294

C -0.87670 4.86807 -1.37893

H -0.23415 -0.08645 -0.55516

H 0.63828 1.85418 2.54476

H 1.34521 3.00448 1.38539

H 2.90270 1.18427 3.08109

H 4.21057 -0.49068 4.35349

H 4.24019 -2.86454 3.62353

H 2.93051 -3.55888 1.62913

H 1.61479 -1.88277 0.36497

H -0.35907 5.80968 -1.19834

---

|    |          |          |          |
|----|----------|----------|----------|
| H  | -0.73462 | 4.54613  | -2.41258 |
| H  | -1.94626 | 4.97720  | -1.18341 |
| Ag | -2.84418 | 1.03360  | 0.13835  |
| H  | -0.40064 | -0.27942 | 1.19135  |
| C  | -4.13521 | -0.74731 | 1.02484  |
| C  | -3.94552 | -1.08679 | -0.32365 |
| C  | -2.85768 | -1.92098 | -0.72042 |
| C  | -1.99496 | -2.44549 | 0.29651  |
| C  | -2.23067 | -2.12757 | 1.66012  |
| C  | -3.26813 | -1.29859 | 2.02762  |
| H  | -3.27456 | -1.83848 | -2.84130 |
| H  | -5.04519 | -0.23372 | 1.32885  |
| H  | -4.68169 | -0.78491 | -1.06315 |
| C  | -2.60745 | -2.23414 | -2.08089 |
| C  | -0.89931 | -3.25749 | -0.09853 |
| H  | -1.58649 | -2.53556 | 2.43171  |
| C  | -0.67185 | -3.53244 | -1.42878 |
| C  | -1.53381 | -3.02224 | -2.42964 |
| H  | -0.24281 | -3.65548 | 0.66908  |
| H  | 0.17238  | -4.15111 | -1.71612 |
| H  | -1.35038 | -3.26269 | -3.47160 |
| O  | -3.43629 | -1.01175 | 3.34090  |
| H  | -4.22473 | -0.46900 | 3.47349  |
| C  | 4.67241  | 0.66057  | -0.19989 |
| C  | 4.49488  | -0.44819 | -1.00363 |
| C  | 3.30321  | -0.66357 | -1.75874 |
| C  | 2.22879  | 0.25199  | -1.61589 |

|   |         |          |          |
|---|---------|----------|----------|
| C | 2.25629 | 1.26457  | -0.51763 |
| C | 3.61273 | 1.55383  | -0.02259 |
| H | 4.04542 | -2.40710 | -2.79823 |
| H | 5.62004 | 0.83455  | 0.30088  |
| H | 5.31273 | -1.15407 | -1.11635 |
| C | 3.21871 | -1.70938 | -2.70415 |
| C | 1.13308 | 0.15122  | -2.47382 |
| H | 1.73270 | 2.17946  | -0.81510 |
| C | 1.07113 | -0.87838 | -3.41344 |
| C | 2.10287 | -1.82266 | -3.51711 |
| H | 0.32575 | 0.87507  | -2.41428 |
| H | 0.21177 | -0.94386 | -4.07188 |
| H | 2.03875 | -2.62119 | -4.24840 |
| O | 3.72174 | 2.65326  | 0.70874  |
| H | 4.60254 | 2.72473  | 1.11121  |

46

Name: TS2-trans Energy: -767693.8774292

|   |          |         |          |
|---|----------|---------|----------|
| C | -1.88013 | 0.35930 | -0.30648 |
| C | -3.03982 | 0.97790 | -1.00707 |
| C | 1.39649  | 1.61946 | -0.31962 |
| C | -1.04488 | 1.24500 | 0.65931  |
| C | 0.21643  | 0.79997 | -0.08137 |
| C | -0.62138 | 0.14798 | -1.17702 |
| C | 2.27294  | 1.31463 | -1.37646 |
| C | 3.39779  | 2.10382 | -1.60928 |
| C | 3.66043  | 3.20257 | -0.79009 |
| C | 2.79727  | 3.51372 | 0.26758  |

---

|   |          |          |          |
|---|----------|----------|----------|
| C | 1.67816  | 2.72569  | 0.50532  |
| O | -3.27453 | 0.84650  | -2.19338 |
| O | -3.79909 | 1.71708  | -0.16517 |
| C | -4.95967 | 2.33010  | -0.76143 |
| H | -1.09562 | 1.07709  | 1.73513  |
| H | -0.63998 | 0.79738  | -2.06214 |
| H | -0.35014 | -0.84849 | -1.52519 |
| H | 2.06392  | 0.46353  | -2.01608 |
| H | 4.06227  | 1.86743  | -2.43379 |
| H | 4.53047  | 3.82335  | -0.97818 |
| H | 2.99644  | 4.37707  | 0.89409  |
| H | 1.00191  | 2.97206  | 1.31835  |
| H | -5.43487 | 2.89583  | 0.03844  |
| H | -4.66534 | 2.98928  | -1.58054 |
| H | -5.63675 | 1.56441  | -1.14742 |
| H | -1.22445 | 2.31407  | 0.48719  |
| C | 1.88147  | -3.26367 | -1.62448 |
| C | 1.08597  | -2.59029 | -0.70597 |
| C | 1.65092  | -1.63325 | 0.15289  |
| C | 3.05279  | -1.39270 | 0.08973  |
| C | 3.84299  | -2.08292 | -0.85679 |
| C | 3.26159  | -3.00217 | -1.71029 |
| H | -0.16480 | -1.17772 | 1.26813  |
| H | 1.43504  | -4.00623 | -2.27781 |
| H | 0.02696  | -2.81911 | -0.63041 |
| C | 0.84503  | -0.83661 | 1.05613  |
| C | 3.62901  | -0.48320 | 1.02398  |

---

|    |          |          |          |
|----|----------|----------|----------|
| H  | 4.91007  | -1.88702 | -0.89898 |
| H  | 3.86787  | -3.53455 | -2.43486 |
| C  | 2.89581  | 0.11134  | 2.02799  |
| C  | 1.51086  | -0.12166 | 2.09087  |
| H  | 4.69544  | -0.28672 | 0.96152  |
| H  | 3.37589  | 0.75583  | 2.75759  |
| O  | 0.74242  | 0.39525  | 3.05318  |
| H  | 1.26533  | 0.92956  | 3.67076  |
| Ag | -2.75639 | -1.40868 | 0.55346  |

46

Name: TS2-O Energy: -767693.1174775

|   |          |          |          |
|---|----------|----------|----------|
| C | 2.45354  | 0.00199  | 0.05659  |
| C | 2.56746  | -1.38568 | 0.63089  |
| C | -0.56581 | 1.89356  | 0.19254  |
| C | 1.14837  | 0.13869  | -0.81523 |
| C | 0.49007  | 0.92462  | 0.30152  |
| C | 1.78345  | 0.98843  | 1.09049  |
| C | -0.78130 | 2.83640  | 1.21871  |
| C | -1.86477 | 3.70036  | 1.14966  |
| C | -2.74731 | 3.62907  | 0.06211  |
| C | -2.54883 | 2.69484  | -0.95568 |
| C | -1.46524 | 1.82409  | -0.88996 |
| O | 1.63378  | -1.97863 | 1.19097  |
| O | 3.75246  | -1.95984 | 0.50033  |
| C | 3.89894  | -3.29782 | 1.04898  |
| H | 0.65095  | -0.78069 | -1.13755 |
| H | 2.20542  | 1.99599  | 1.07450  |

---

|   |          |          |          |
|---|----------|----------|----------|
| H | 1.73053  | 0.65811  | 2.13190  |
| H | -0.10145 | 2.87637  | 2.06396  |
| H | -2.02992 | 4.43007  | 1.93506  |
| H | -3.59269 | 4.30803  | 0.01252  |
| H | -3.24134 | 2.63815  | -1.78813 |
| H | -1.31362 | 1.08422  | -1.66883 |
| H | 4.93164  | -3.57391 | 0.84890  |
| H | 3.69526  | -3.28200 | 2.12032  |
| H | 3.20642  | -3.97841 | 0.55199  |
| H | 1.27984  | 0.76975  | -1.69773 |
| C | -6.26860 | -0.34590 | -0.17632 |
| C | -5.12566 | 0.06345  | 0.47208  |
| C | -3.91141 | -0.65341 | 0.31022  |
| C | -3.88889 | -1.80750 | -0.54043 |
| C | -5.08604 | -2.20492 | -1.18838 |
| C | -6.24938 | -1.48967 | -1.01130 |
| H | -2.71162 | 0.61806  | 1.60328  |
| H | -7.19419 | 0.20563  | -0.04667 |
| H | -5.13627 | 0.93754  | 1.11644  |
| C | -2.71671 | -0.24836 | 0.95211  |
| C | -2.66838 | -2.51713 | -0.70643 |
| H | -5.07039 | -3.08265 | -1.82764 |
| H | -7.16019 | -1.80180 | -1.51171 |
| C | -1.51128 | -2.10140 | -0.09133 |
| C | -1.55321 | -0.95533 | 0.74220  |
| H | -2.65978 | -3.40353 | -1.33336 |
| H | -0.58504 | -2.65523 | -0.20327 |

---

|    |          |          |          |
|----|----------|----------|----------|
| O  | -0.39483 | -0.46910 | 1.32275  |
| H  | 0.35066  | -1.17073 | 1.32955  |
| Ag | 4.30809  | 0.60292  | -0.82562 |

46

Name: TS2-cis Energy: -767698.9670581

|   |          |          |          |
|---|----------|----------|----------|
| C | 1.66645  | 0.28088  | 0.09878  |
| C | 2.39554  | -0.97573 | 0.39020  |
| C | -1.50135 | 1.66913  | 0.30223  |
| C | 0.37160  | 0.15013  | -0.76435 |
| C | -0.42133 | 0.70148  | 0.41584  |
| C | 0.84211  | 0.92181  | 1.24337  |
| C | -1.84016 | 2.48543  | 1.40125  |
| C | -2.87897 | 3.40113  | 1.30279  |
| C | -3.59415 | 3.52157  | 0.10385  |
| C | -3.27322 | 2.71644  | -0.98979 |
| C | -2.24262 | 1.78510  | -0.88932 |
| O | 2.68147  | -1.41042 | 1.50790  |
| O | 2.73682  | -1.63461 | -0.73464 |
| C | 3.52309  | -2.82985 | -0.56255 |
| H | 0.14493  | -0.86596 | -1.09859 |
| H | 1.01016  | 1.99029  | 1.39899  |
| H | 0.92063  | 0.43100  | 2.21492  |
| H | -1.28305 | 2.39434  | 2.32914  |
| H | -3.13177 | 4.02828  | 2.15117  |
| H | -4.39990 | 4.24442  | 0.02663  |
| H | -3.82983 | 2.80855  | -1.91642 |
| H | -2.00475 | 1.14855  | -1.73473 |

---

|    |          |          |          |
|----|----------|----------|----------|
| H  | 3.72954  | -3.18779 | -1.56960 |
| H  | 4.45070  | -2.60095 | -0.03410 |
| H  | 2.96965  | -3.58210 | 0.00382  |
| H  | 0.29866  | 0.80273  | -1.63670 |
| C  | -4.52550 | -0.97936 | -0.84840 |
| C  | -3.66827 | -0.63885 | 0.18938  |
| C  | -2.44272 | -1.30808 | 0.34149  |
| C  | -2.10118 | -2.34755 | -0.57224 |
| C  | -2.98557 | -2.67023 | -1.62606 |
| C  | -4.18233 | -1.99058 | -1.76399 |
| H  | -1.81179 | -0.30544 | 2.17746  |
| H  | -5.47245 | -0.45986 | -0.95271 |
| H  | -3.94240 | 0.14035  | 0.89218  |
| C  | -1.48332 | -0.93039 | 1.35435  |
| C  | -0.89215 | -3.07651 | -0.35933 |
| H  | -2.71857 | -3.46428 | -2.31685 |
| H  | -4.86294 | -2.24374 | -2.56966 |
| C  | -0.05946 | -2.82916 | 0.70822  |
| C  | -0.38421 | -1.79656 | 1.61783  |
| H  | -0.64926 | -3.88229 | -1.04661 |
| H  | 0.81371  | -3.44322 | 0.89232  |
| O  | 0.33123  | -1.56093 | 2.71111  |
| H  | 1.28735  | -1.76025 | 2.54153  |
| Ag | 3.20323  | 1.55518  | -0.72741 |

27

Name: TS1 Energy: -478180.8838067

|   |          |         |          |
|---|----------|---------|----------|
| C | -0.20799 | 0.40382 | -0.96751 |
|---|----------|---------|----------|



---

|    |          |          |          |
|----|----------|----------|----------|
| C  | -1.26246 | -0.23543 | -0.11611 |
| C  | 0.82683  | 0.04666  | 0.16699  |
| C  | -0.28429 | -0.81451 | 0.84634  |
| C  | -2.65633 | -0.17181 | -0.12841 |
| C  | 1.18504  | 1.20527  | 1.05770  |
| O  | 0.92362  | 1.21011  | 2.24336  |
| C  | -3.40757 | -0.81666 | 0.89976  |
| C  | -4.78746 | -0.76409 | 0.87966  |
| C  | -5.43788 | -0.07196 | -0.15565 |
| C  | -4.71857 | 0.57191  | -1.17733 |
| C  | -3.33859 | 0.52899  | -1.16771 |
| O  | 1.77317  | 2.30234  | 0.52060  |
| C  | 2.40634  | 2.30753  | -0.75949 |
| H  | -0.37859 | 1.46232  | -1.19629 |
| H  | -0.07081 | -0.12403 | -1.91912 |
| H  | -0.46035 | -0.58110 | 1.90468  |
| H  | -0.18984 | -1.90195 | 0.74219  |
| H  | -2.88402 | -1.33819 | 1.69392  |
| H  | -5.36834 | -1.24751 | 1.65694  |
| H  | -6.52291 | -0.03020 | -0.16498 |
| H  | -5.24810 | 1.10024  | -1.96203 |
| H  | -2.76481 | 1.02242  | -1.94507 |
| H  | 2.73495  | 3.33457  | -0.91787 |
| H  | 3.28388  | 1.64924  | -0.76574 |
| H  | 1.73397  | 2.01785  | -1.57140 |
| Ag | 2.65230  | -0.99152 | -0.29652 |

Name: INT3 Energy: -1057233.0071128

|    |          |          |          |
|----|----------|----------|----------|
| C  | 3.30765  | 1.00876  | -0.56095 |
| C  | 4.28606  | -0.10470 | -0.31443 |
| C  | 0.64194  | 2.72791  | -0.79930 |
| C  | 2.34798  | 1.36021  | 0.61238  |
| C  | 1.14016  | 1.35805  | -0.37787 |
| C  | 2.06749  | 0.65744  | -1.42167 |
| C  | 0.17137  | 2.93660  | -2.10227 |
| C  | -0.36741 | 4.16576  | -2.48075 |
| C  | -0.44833 | 5.20793  | -1.55694 |
| C  | 0.00933  | 5.00986  | -0.25400 |
| C  | 0.54796  | 3.77971  | 0.12093  |
| O  | 3.99266  | -1.26235 | 0.02505  |
| O  | 5.53917  | 0.25381  | -0.49053 |
| C  | 6.56464  | -0.75060 | -0.26819 |
| H  | 2.56692  | 2.28775  | 1.13989  |
| H  | 1.89860  | -0.41921 | -1.47722 |
| H  | 2.06696  | 1.06071  | -2.43358 |
| H  | 0.21973  | 2.13309  | -2.83099 |
| H  | -0.71973 | 4.30928  | -3.49737 |
| H  | -0.86195 | 6.16722  | -1.85082 |
| H  | -0.05075 | 5.81359  | 0.47297  |
| H  | 0.87985  | 3.63840  | 1.14370  |
| H  | 7.50492  | -0.24130 | -0.46613 |
| H  | 6.51852  | -1.10430 | 0.76280  |
| H  | 6.41817  | -1.58597 | -0.95434 |
| Ag | 2.07331  | -2.14684 | 0.50099  |

---

|   |          |          |          |
|---|----------|----------|----------|
| H | 2.29085  | 0.54421  | 1.33712  |
| C | -0.96911 | 1.97475  | 3.50888  |
| C | -0.28716 | 1.28452  | 2.50734  |
| C | -0.84669 | 1.13350  | 1.23764  |
| C | -2.13875 | 1.66741  | 0.99672  |
| C | -2.81044 | 2.37762  | 2.01401  |
| C | -2.22786 | 2.53822  | 3.25995  |
| H | 0.38109  | -0.45152 | 0.51885  |
| H | -0.52084 | 2.06928  | 4.49266  |
| H | 0.67776  | 0.84508  | 2.72959  |
| C | -0.07709 | 0.46710  | 0.12718  |
| C | -2.78374 | 1.41293  | -0.25335 |
| H | -3.79739 | 2.78173  | 1.80987  |
| H | -2.74767 | 3.07943  | 4.04285  |
| C | -2.21583 | 0.61040  | -1.21996 |
| C | -0.95503 | 0.06182  | -1.00215 |
| H | -3.75973 | 1.85063  | -0.43266 |
| H | -2.77183 | 0.35210  | -2.11524 |
| O | -0.39050 | -0.75468 | -1.88778 |
| H | -1.06227 | -1.15714 | -2.46399 |
| H | 3.84764  | 1.88028  | -0.92915 |
| C | -5.52591 | -1.50899 | -1.28311 |
| C | -4.50836 | -2.34548 | -1.71310 |
| C | -3.33813 | -2.52088 | -0.94222 |
| C | -3.21318 | -1.83023 | 0.30644  |
| C | -4.27540 | -0.99480 | 0.73203  |
| C | -5.40851 | -0.83698 | -0.05116 |

|   |          |          |          |
|---|----------|----------|----------|
| H | -2.36269 | -3.91388 | -2.29103 |
| H | -6.41932 | -1.38346 | -1.88555 |
| H | -4.60306 | -2.88075 | -2.65431 |
| C | -2.24959 | -3.34197 | -1.37292 |
| C | -1.99400 | -1.90540 | 1.01904  |
| H | -4.19216 | -0.48763 | 1.68813  |
| H | -6.21789 | -0.19953 | 0.29184  |
| C | -0.91259 | -2.67743 | 0.56095  |
| C | -1.08666 | -3.42637 | -0.65030 |
| H | -1.88440 | -1.37892 | 1.96097  |
| H | -0.26285 | -4.05018 | -0.98497 |
| O | 0.21483  | -2.69150 | 1.23531  |

65

Name: INT2 Energy: -1057219.0594787

|   |          |          |          |
|---|----------|----------|----------|
| C | -0.09688 | -1.37887 | -0.47570 |
| C | 0.23757  | -2.76909 | -0.70900 |
| C | 1.15511  | 1.84039  | -0.41118 |
| C | 0.70877  | -0.55905 | 0.57133  |
| C | 1.23128  | 0.34505  | -0.58641 |
| C | 0.16153  | -0.28596 | -1.53225 |
| C | 1.09375  | 2.66235  | -1.54472 |
| C | 1.07808  | 4.04978  | -1.41886 |
| C | 1.11156  | 4.63745  | -0.15092 |
| C | 1.16108  | 3.82771  | 0.98370  |
| C | 1.18971  | 2.43806  | 0.85286  |
| O | 0.49834  | -3.30883 | -1.81461 |
| O | 0.25772  | -3.51505 | 0.41580  |

---

|   |          |          |          |
|---|----------|----------|----------|
| C | 0.50665  | -4.92246 | 0.25444  |
| H | 1.44163  | -1.11644 | 1.15823  |
| H | -0.67314 | 0.41189  | -1.63000 |
| H | 0.46240  | -0.59524 | -2.53199 |
| H | 1.06188  | 2.21243  | -2.53361 |
| H | 1.03696  | 4.67256  | -2.30706 |
| H | 1.10127  | 5.71814  | -0.05055 |
| H | 1.19259  | 4.27613  | 1.97189  |
| H | 1.25931  | 1.81967  | 1.74155  |
| H | 0.51864  | -5.33012 | 1.26413  |
| H | -0.28718 | -5.38491 | -0.33647 |
| H | 1.46320  | -5.10081 | -0.24153 |
| H | 0.09229  | 0.01464  | 1.26365  |
| C | 4.97746  | 2.02450  | 1.25260  |
| C | 4.14982  | 1.68340  | 0.18244  |
| C | 3.73741  | 0.36318  | 0.00559  |
| C | 4.20002  | -0.62760 | 0.90874  |
| C | 5.02456  | -0.26633 | 1.99499  |
| C | 5.40496  | 1.05481  | 2.16933  |
| H | 2.90199  | 0.56613  | -1.97610 |
| H | 5.29339  | 3.05565  | 1.37303  |
| H | 3.82463  | 2.44819  | -0.51320 |
| C | 2.76959  | -0.02611 | -1.06820 |
| C | 3.90007  | -2.00342 | 0.64381  |
| H | 5.36902  | -1.03604 | 2.67907  |
| H | 6.04317  | 1.33485  | 3.00030  |
| C | 3.23824  | -2.42612 | -0.48368 |

---

|    |          |          |          |
|----|----------|----------|----------|
| C  | 2.77918  | -1.46957 | -1.41686 |
| H  | 4.27923  | -2.74703 | 1.34044  |
| H  | 3.12726  | -3.47960 | -0.70985 |
| O  | 2.27360  | -1.80595 | -2.56287 |
| H  | 1.57436  | -2.59766 | -2.43149 |
| Ag | -2.21390 | -1.45805 | 0.00385  |
| C  | -4.36243 | -0.76301 | 0.95889  |
| C  | -4.33389 | -0.16105 | -0.30395 |
| C  | -3.68292 | 1.08973  | -0.50865 |
| C  | -3.06542 | 1.72933  | 0.61971  |
| C  | -3.13609 | 1.12044  | 1.89935  |
| C  | -3.77467 | -0.09115 | 2.08064  |
| H  | -4.08131 | 1.20818  | -2.63296 |
| H  | -4.94184 | -1.67001 | 1.11454  |
| H  | -4.85544 | -0.63111 | -1.13282 |
| C  | -3.60595 | 1.69884  | -1.78851 |
| C  | -2.38260 | 2.95649  | 0.41164  |
| H  | -2.69259 | 1.61132  | 2.75912  |
| C  | -2.32096 | 3.51943  | -0.84199 |
| C  | -2.93680 | 2.88967  | -1.95200 |
| H  | -1.90007 | 3.43971  | 1.25436  |
| H  | -1.78804 | 4.45214  | -0.98447 |
| H  | -2.88156 | 3.35308  | -2.93142 |
| O  | -3.80965 | -0.62518 | 3.32667  |
| H  | -4.35583 | -1.42228 | 3.33929  |

27

Name: INT1 Energy: -478188.7256532

---

|    |          |          |          |
|----|----------|----------|----------|
| C  | 0.06860  | 0.06586  | -1.67357 |
| C  | -0.88345 | -0.84548 | -0.99482 |
| C  | 0.67747  | -0.26700 | -0.26090 |
| C  | 0.09361  | -1.72919 | -0.33267 |
| C  | -2.19500 | -0.50552 | -0.53759 |
| C  | 0.23328  | 0.46894  | 0.99206  |
| O  | -0.14589 | -0.14900 | 1.96219  |
| C  | -2.81414 | -1.24728 | 0.49775  |
| C  | -4.09007 | -0.91319 | 0.92389  |
| C  | -4.77056 | 0.15148  | 0.32193  |
| C  | -4.17843 | 0.88561  | -0.71479 |
| C  | -2.90042 | 0.56542  | -1.14131 |
| O  | 0.30283  | 1.81215  | 1.05259  |
| C  | 0.80627  | 2.65400  | 0.00902  |
| H  | -0.25690 | 1.07634  | -1.89558 |
| H  | 0.64978  | -0.36810 | -2.48529 |
| H  | -0.17797 | -2.19620 | 0.60878  |
| H  | 0.66780  | -2.37455 | -0.99391 |
| H  | -2.28896 | -2.07076 | 0.96453  |
| H  | -4.55934 | -1.47633 | 1.72273  |
| H  | -5.77056 | 0.40771  | 0.65701  |
| H  | -4.72089 | 1.69950  | -1.18293 |
| H  | -2.44952 | 1.12064  | -1.95628 |
| H  | 1.11450  | 3.57680  | 0.49957  |
| H  | 1.66785  | 2.21193  | -0.50217 |
| H  | 0.02179  | 2.88177  | -0.71773 |
| Ag | 2.86306  | -0.28714 | -0.02917 |

20

Name: FEnergy: -381656.8889396

|    |          |          |          |
|----|----------|----------|----------|
| C  | -0.99269 | 0.75347  | 1.10058  |
| C  | -0.05944 | -0.30668 | 1.28115  |
| C  | 1.21004  | -0.28309 | 0.64194  |
| C  | 1.53059  | 0.84999  | -0.18752 |
| C  | 0.59450  | 1.90565  | -0.33657 |
| C  | -0.63807 | 1.88105  | 0.29114  |
| H  | 1.93036  | -2.15293 | 1.47518  |
| H  | -1.86187 | 0.81053  | 1.75476  |
| H  | -0.26322 | -1.06402 | 2.03564  |
| C  | 2.17312  | -1.31130 | 0.83235  |
| C  | 2.80410  | 0.89064  | -0.81456 |
| H  | 0.85091  | 2.77438  | -0.93497 |
| C  | 3.71222  | -0.12688 | -0.61755 |
| C  | 3.40000  | -1.23228 | 0.21465  |
| H  | 3.05533  | 1.73991  | -1.44238 |
| H  | 4.68450  | -0.08112 | -1.09777 |
| H  | 4.13688  | -2.01414 | 0.36580  |
| O  | -1.47657 | 2.92558  | 0.10234  |
| H  | -2.21162 | 2.91311  | 0.73070  |
| Ag | -1.72160 | -0.94582 | -0.38594 |

46

Name: E Energy: -675811.0295162

|   |          |          |          |
|---|----------|----------|----------|
| C | -2.11415 | -1.35248 | -0.46920 |
| C | -3.42403 | -0.61349 | -0.27820 |
| C | 1.21678  | -1.61102 | 0.00252  |



---

|   |          |          |          |
|---|----------|----------|----------|
| C | -0.92191 | -0.52909 | -1.07360 |
| C | -0.05772 | -0.81096 | 0.19932  |
| C | -1.24236 | -1.66000 | 0.78194  |
| C | 1.69656  | -2.40958 | 1.05415  |
| C | 2.86250  | -3.15902 | 0.90912  |
| C | 3.57006  | -3.12659 | -0.29551 |
| C | 3.10686  | -2.33462 | -1.34530 |
| C | 1.94389  | -1.57636 | -1.19433 |
| O | -3.67518 | 0.25741  | 0.55928  |
| O | -4.32440 | -0.99877 | -1.17012 |
| C | -5.62632 | -0.36149 | -1.12014 |
| H | -1.13555 | 0.51685  | -1.29489 |
| H | -0.98313 | -2.71731 | 0.84559  |
| H | -1.65320 | -1.35085 | 1.74003  |
| H | 1.15100  | -2.45638 | 1.99354  |
| H | 3.21259  | -3.77547 | 1.73112  |
| H | 4.47279  | -3.71738 | -0.41367 |
| H | 3.64901  | -2.30368 | -2.28524 |
| H | 1.61084  | -0.95498 | -2.01969 |
| H | -6.20310 | -0.83250 | -1.91317 |
| H | -6.08792 | -0.53248 | -0.14658 |
| H | -5.52566 | 0.71087  | -1.29541 |
| H | -0.52970 | -0.99038 | -1.97947 |
| C | 3.73372  | 1.77402  | -0.11557 |
| C | 2.76066  | 1.01337  | 0.53778  |
| C | 1.41403  | 1.36481  | 0.45231  |
| C | 1.06263  | 2.53186  | -0.28241 |

---

|   |          |          |          |
|---|----------|----------|----------|
| C | 2.05674  | 3.28071  | -0.95334 |
| C | 3.38557  | 2.89950  | -0.87454 |
| H | 0.66525  | 0.11998  | 2.05264  |
| H | 4.77679  | 1.48650  | -0.02891 |
| H | 3.05942  | 0.14767  | 1.11760  |
| C | 0.33182  | 0.54711  | 1.10265  |
| C | -0.28418 | 3.00167  | -0.24049 |
| H | 1.76760  | 4.16723  | -1.51001 |
| H | 4.15279  | 3.47568  | -1.38016 |
| C | -1.26520 | 2.41531  | 0.53289  |
| C | -0.93585 | 1.29117  | 1.30824  |
| H | -0.52680 | 3.90361  | -0.79781 |
| H | -2.25418 | 2.85229  | 0.61497  |
| O | -1.77578 | 0.77522  | 2.16596  |
| H | -2.70106 | 0.76973  | 1.76241  |
| H | -2.33563 | -2.23889 | -1.06357 |

18

Name: D Energy: -289169.7994639

|   |          |          |          |
|---|----------|----------|----------|
| C | -2.89453 | 0.41569  | -0.00034 |
| C | -1.80393 | 1.26882  | -0.00044 |
| C | -0.48011 | 0.78511  | -0.00002 |
| C | -0.23371 | -0.64061 | 0.00034  |
| C | -1.38647 | -1.49044 | 0.00026  |
| C | -2.66682 | -0.98239 | -0.00006 |
| H | 0.48685  | 2.72267  | 0.00060  |
| H | -3.90835 | 0.80824  | -0.00069 |
| H | -1.95570 | 2.34847  | -0.00066 |

---

|   |          |          |          |
|---|----------|----------|----------|
| C | 0.65818  | 1.64476  | 0.00035  |
| C | 1.07849  | -1.13162 | 0.00053  |
| H | -1.22760 | -2.56750 | 0.00048  |
| H | -3.51631 | -1.66409 | -0.00007 |
| C | 2.23840  | -0.28940 | -0.00009 |
| C | 1.93134  | 1.14778  | 0.00055  |
| H | 1.24468  | -2.20775 | 0.00068  |
| H | 2.79066  | 1.81657  | 0.00085  |
| O | 3.43009  | -0.70286 | -0.00096 |

45

Name: cis-3aa Energy: -675560.0476915

|   |          |          |          |
|---|----------|----------|----------|
| C | 1.67270  | -2.08338 | -0.62466 |
| C | 2.94198  | -1.33379 | -0.31913 |
| C | 0.11384  | 0.39272  | 0.55200  |
| C | -1.65067 | -1.34346 | 0.07860  |
| H | 1.95517  | -3.00146 | -1.14904 |
| C | 0.69772  | -2.22662 | 0.55583  |
| C | -0.15758 | -1.01880 | 0.01757  |
| C | 0.60465  | -1.21519 | -1.35154 |
| C | -0.44597 | 1.49086  | -0.20477 |
| C | -0.27851 | 2.84134  | 0.24495  |
| C | 0.42422  | 3.08589  | 1.45259  |
| C | 0.94972  | 2.04353  | 2.16107  |
| C | 0.81048  | 0.70062  | 1.71546  |
| C | -1.19048 | 1.30132  | -1.40411 |
| C | -1.70745 | 2.36362  | -2.11270 |
| C | -1.52095 | 3.68958  | -1.66756 |

---

|   |          |          |          |
|---|----------|----------|----------|
| C | -0.82171 | 3.91494  | -0.50549 |
| C | -2.45834 | -0.77241 | 1.07020  |
| C | -3.80425 | -1.11507 | 1.18680  |
| C | -4.37573 | -2.03723 | 0.31077  |
| C | -3.58167 | -2.62134 | -0.67521 |
| C | -2.23357 | -2.28154 | -0.78386 |
| O | 1.39580  | -0.23072 | 2.53900  |
| O | 3.33741  | -0.99570 | 0.78700  |
| O | 3.63319  | -1.06931 | -1.43675 |
| C | 4.85122  | -0.32227 | -1.25660 |
| H | 0.10890  | -3.13804 | 0.43765  |
| H | 1.07883  | -2.18894 | 1.56969  |
| H | 0.04906  | -1.79789 | -2.08723 |
| H | 0.96584  | -0.30479 | -1.82963 |
| H | 0.54151  | 4.10918  | 1.79798  |
| H | 1.49898  | 2.19554  | 3.08366  |
| H | -1.38344 | 0.30161  | -1.76589 |
| H | -2.27169 | 2.17437  | -3.02095 |
| H | -1.93304 | 4.51891  | -2.23381 |
| H | -0.67416 | 4.92614  | -0.13586 |
| H | -2.02735 | -0.04779 | 1.75146  |
| H | -4.40768 | -0.65500 | 1.96362  |
| H | -5.42576 | -2.29926 | 0.39624  |
| H | -4.00946 | -3.34457 | -1.36329 |
| H | -1.63723 | -2.76204 | -1.55278 |
| H | 2.15519  | -0.61915 | 2.05573  |
| H | 5.26065  | -0.18750 | -2.25659 |

H 4.63817 0.64262 -0.79179

H 5.54840 -0.87602 -0.62426

65

Name: C Energy: -1057197.2816433

C -0.19275 1.44624 -1.04131

C 0.12862 2.59365 -0.31639

C -2.53855 -1.11754 -1.25806

C -0.39272 0.09809 -0.36685

C -1.89226 0.16435 -0.80819

C -1.46346 1.25016 -1.85893

C -3.31621 -1.16996 -2.42156

C -3.96073 -2.35023 -2.79185

C -3.83649 -3.49447 -2.00128

C -3.05393 -3.45541 -0.84639

C -2.40764 -2.27458 -0.47914

O 0.89643 2.63749 0.72436

O -0.41773 3.75336 -0.74785

C 0.06783 4.96796 -0.15573

H -0.14680 -0.01211 0.69024

H -1.28425 0.75771 -2.82115

H -2.11540 2.10964 -2.01696

H -3.41142 -0.28457 -3.04295

H -4.55154 -2.38043 -3.70218

H -4.33480 -4.41383 -2.29158

H -2.93996 -4.34594 -0.23586

H -1.79711 -2.24956 0.41838

H -0.46665 5.76973 -0.66453

---

|    |          |          |          |
|----|----------|----------|----------|
| H  | -0.13935 | 4.99341  | 0.91632  |
| H  | 1.14442  | 5.07479  | -0.31319 |
| Ag | 2.61082  | 1.39073  | 0.44396  |
| H  | 0.06402  | -0.73218 | -0.91375 |
| C  | 3.57805  | 0.57720  | -1.51328 |
| C  | 4.48511  | 0.18324  | -0.51765 |
| C  | 4.47380  | -1.15609 | -0.01273 |
| C  | 3.52844  | -2.08199 | -0.56341 |
| C  | 2.59371  | -1.63908 | -1.54007 |
| C  | 2.57849  | -0.33601 | -1.98569 |
| H  | 6.11162  | -0.88930 | 1.37417  |
| H  | 3.69096  | 1.52926  | -2.02540 |
| H  | 5.30735  | 0.84087  | -0.24599 |
| C  | 5.38934  | -1.59550 | 0.97448  |
| C  | 3.53403  | -3.41873 | -0.08845 |
| H  | 1.85315  | -2.33083 | -1.92933 |
| C  | 4.43190  | -3.81701 | 0.87758  |
| C  | 5.36866  | -2.90136 | 1.41272  |
| H  | 2.82107  | -4.12455 | -0.50387 |
| H  | 4.42897  | -4.84405 | 1.22828  |
| H  | 6.07588  | -3.23401 | 2.16520  |
| O  | 1.63317  | 0.09208  | -2.86297 |
| H  | 1.13840  | 0.83651  | -2.43018 |
| C  | -5.11667 | -0.00405 | 0.28276  |
| C  | -4.81638 | -0.78670 | 1.37969  |
| C  | -3.61831 | -0.61989 | 2.13630  |
| C  | -2.65478 | 0.32133  | 1.69051  |

---

|   |          |          |          |
|---|----------|----------|----------|
| C | -2.78969 | 0.93780  | 0.33717  |
| C | -4.16818 | 0.91089  | -0.18217 |
| H | -4.17320 | -2.02121 | 3.68577  |
| H | -6.07318 | -0.10098 | -0.22164 |
| H | -5.54626 | -1.51451 | 1.72275  |
| C | -3.43151 | -1.29780 | 3.36090  |
| C | -1.56856 | 0.62167  | 2.51282  |
| H | -2.37554 | 1.95151  | 0.32663  |
| C | -1.40789 | -0.04317 | 3.73015  |
| C | -2.32608 | -1.01796 | 4.14745  |
| H | -0.85375 | 1.38174  | 2.21066  |
| H | -0.56415 | 0.20671  | 4.36567  |
| H | -2.18328 | -1.53104 | 5.09215  |
| O | -4.40377 | 1.72358  | -1.19903 |
| H | -5.28382 | 1.57029  | -1.58039 |

46

Name: B-trans Energy: -767698.6458171

|   |          |         |          |
|---|----------|---------|----------|
| C | -1.87724 | 0.36753 | -0.31403 |
| C | -3.08580 | 0.92621 | -0.98060 |
| C | 1.38255  | 1.60982 | -0.34137 |
| C | -1.04234 | 1.25169 | 0.63657  |
| C | 0.25172  | 0.67323 | -0.01068 |
| C | -0.63096 | 0.17069 | -1.18807 |
| C | 2.25286  | 1.32049 | -1.39904 |
| C | 3.34718  | 2.14528 | -1.66512 |
| C | 3.58198  | 3.27294 | -0.87750 |
| C | 2.71076  | 3.57855 | 0.16992  |

---

|   |          |          |          |
|---|----------|----------|----------|
| C | 1.61996  | 2.75127  | 0.43609  |
| O | -3.35965 | 0.76160  | -2.15404 |
| O | -3.83876 | 1.65647  | -0.12498 |
| C | -5.03704 | 2.22241  | -0.69126 |
| H | -1.17270 | 1.16437  | 1.71437  |
| H | -0.61084 | 0.91833  | -1.98939 |
| H | -0.42073 | -0.79414 | -1.64504 |
| H | 2.07253  | 0.44860  | -2.02029 |
| H | 4.00835  | 1.91265  | -2.49396 |
| H | 4.42763  | 3.91920  | -1.08905 |
| H | 2.87403  | 4.46744  | 0.77126  |
| H | 0.94113  | 3.00169  | 1.24619  |
| H | -5.50233 | 2.78840  | 0.11432  |
| H | -4.79131 | 2.87513  | -1.53136 |
| H | -5.70311 | 1.42980  | -1.04063 |
| H | -1.14752 | 2.30864  | 0.36758  |
| C | 1.81914  | -3.30379 | -1.54727 |
| C | 1.03445  | -2.50006 | -0.71597 |
| C | 1.62773  | -1.53408 | 0.09336  |
| C | 3.04363  | -1.42401 | 0.09791  |
| C | 3.82458  | -2.23005 | -0.75922 |
| C | 3.21277  | -3.15713 | -1.58681 |
| H | -0.10380 | -1.06021 | 1.27552  |
| H | 1.34054  | -4.05554 | -2.16658 |
| H | -0.04103 | -2.64311 | -0.68707 |
| C | 0.80986  | -0.58125 | 0.90456  |
| C | 3.66033  | -0.55388 | 1.04128  |



---

|    |          |          |          |
|----|----------|----------|----------|
| H  | 4.90508  | -2.12501 | -0.74850 |
| H  | 3.80702  | -3.78143 | -2.24456 |
| C  | 2.95205  | 0.12058  | 2.01749  |
| C  | 1.55842  | 0.03662  | 2.01831  |
| H  | 4.74344  | -0.46688 | 1.02785  |
| H  | 3.46724  | 0.70738  | 2.77141  |
| O  | 0.81473  | 0.58958  | 2.95601  |
| H  | 1.35180  | 1.06875  | 3.60947  |
| Ag | -2.66969 | -1.42816 | 0.58109  |

46

Name: B-O Energy: -767695.3504512

|   |          |          |          |
|---|----------|----------|----------|
| C | 2.42259  | -0.03023 | 0.07866  |
| C | 2.43782  | -1.42369 | 0.63201  |
| C | -0.54503 | 1.93272  | 0.18654  |
| C | 1.15383  | 0.17271  | -0.83749 |
| C | 0.40149  | 0.80024  | 0.35343  |
| C | 1.74171  | 0.95371  | 1.09658  |
| C | -0.75185 | 2.82733  | 1.24468  |
| C | -1.69725 | 3.84310  | 1.12500  |
| C | -2.43951 | 3.96981  | -0.05280 |
| C | -2.23391 | 3.08319  | -1.11085 |
| C | -1.28925 | 2.06524  | -0.99105 |
| O | 1.47927  | -1.92743 | 1.26561  |
| O | 3.52000  | -2.13414 | 0.41709  |
| C | 3.54531  | -3.49868 | 0.92752  |
| H | 0.70830  | -0.70585 | -1.30967 |
| H | 2.11394  | 1.97244  | 0.99325  |

---

|   |          |          |          |
|---|----------|----------|----------|
| H | 1.75161  | 0.67991  | 2.15521  |
| H | -0.18216 | 2.72105  | 2.16327  |
| H | -1.85474 | 4.53581  | 1.94514  |
| H | -3.17475 | 4.76259  | -0.14569 |
| H | -2.81096 | 3.18066  | -2.02431 |
| H | -1.14414 | 1.36337  | -1.80636 |
| H | 4.51735  | -3.88819 | 0.63527  |
| H | 3.43359  | -3.48543 | 2.01203  |
| H | 2.73672  | -4.07465 | 0.47631  |
| H | 1.32859  | 0.92492  | -1.60624 |
| C | -6.31911 | -0.45753 | -0.03738 |
| C | -5.15710 | 0.02127  | 0.52226  |
| C | -3.92365 | -0.64195 | 0.29302  |
| C | -3.90241 | -1.81570 | -0.53077 |
| C | -5.12032 | -2.28321 | -1.08995 |
| C | -6.30082 | -1.61887 | -0.84876 |
| H | -2.70449 | 0.71401  | 1.47936  |
| H | -7.25916 | 0.05390  | 0.14228  |
| H | -5.16687 | 0.91119  | 1.14438  |
| C | -2.71036 | -0.17034 | 0.85399  |
| C | -2.66684 | -2.47655 | -0.75794 |
| H | -5.10471 | -3.17376 | -1.71108 |
| H | -7.22711 | -1.98363 | -1.28044 |
| C | -1.49286 | -1.99827 | -0.22087 |
| C | -1.54573 | -0.83705 | 0.57883  |
| H | -2.65611 | -3.37565 | -1.36618 |
| H | -0.55411 | -2.51706 | -0.37723 |

---

|    |          |          |          |
|----|----------|----------|----------|
| O  | -0.33560 | -0.32753 | 1.13413  |
| H  | 0.42939  | -1.11964 | 1.27967  |
| Ag | 4.33766  | 0.49178  | -0.71961 |

46

Name: B Energy: -767702.6367334

|   |          |          |          |
|---|----------|----------|----------|
| C | 1.60634  | 0.26440  | 0.10510  |
| C | 2.37086  | -0.96698 | 0.38415  |
| C | -1.54319 | 1.63452  | 0.30583  |
| C | 0.32545  | 0.13250  | -0.76450 |
| C | -0.52841 | 0.53364  | 0.47715  |
| C | 0.78599  | 0.93471  | 1.22374  |
| C | -1.91649 | 2.40308  | 1.41775  |
| C | -2.88158 | 3.40082  | 1.30018  |
| C | -3.48644 | 3.64583  | 0.06409  |
| C | -3.12108 | 2.88748  | -1.04771 |
| C | -2.15966 | 1.88307  | -0.92570 |
| O | 2.68828  | -1.40917 | 1.49975  |
| O | 2.71751  | -1.62235 | -0.74096 |
| C | 3.54163  | -2.79255 | -0.57633 |
| H | 0.15712  | -0.84958 | -1.21009 |
| H | 0.87139  | 2.02158  | 1.22421  |
| H | 0.94625  | 0.58408  | 2.24163  |
| H | -1.44782 | 2.22101  | 2.38163  |
| H | -3.15809 | 3.99015  | 2.16849  |
| H | -4.23564 | 4.42519  | -0.02968 |
| H | -3.58718 | 3.07190  | -2.01034 |
| H | -1.90335 | 1.28295  | -1.79259 |

---

|    |          |          |          |
|----|----------|----------|----------|
| H  | 3.71602  | -3.16636 | -1.58370 |
| H  | 4.48458  | -2.52750 | -0.09356 |
| H  | 3.03430  | -3.54622 | 0.02986  |
| H  | 0.23673  | 0.87596  | -1.55509 |
| C  | -4.55159 | -1.05255 | -0.77150 |
| C  | -3.61767 | -0.60779 | 0.16539  |
| C  | -2.38509 | -1.24730 | 0.28297  |
| C  | -2.11167 | -2.37234 | -0.53974 |
| C  | -3.06088 | -2.80100 | -1.49419 |
| C  | -4.27134 | -2.13897 | -1.61269 |
| H  | -1.72289 | -0.30113 | 2.11099  |
| H  | -5.50925 | -0.54785 | -0.84698 |
| H  | -3.85189 | 0.23698  | 0.80243  |
| C  | -1.31719 | -0.74462 | 1.19961  |
| C  | -0.91372 | -3.11712 | -0.31765 |
| H  | -2.83657 | -3.66142 | -2.11722 |
| H  | -5.00576 | -2.46745 | -2.33978 |
| C  | -0.02846 | -2.83875 | 0.70275  |
| C  | -0.28647 | -1.74557 | 1.54740  |
| H  | -0.73144 | -3.98545 | -0.94594 |
| H  | 0.81070  | -3.49103 | 0.91226  |
| O  | 0.41832  | -1.49938 | 2.61935  |
| H  | 1.39909  | -1.68138 | 2.44463  |
| Ag | 3.17117  | 1.53182  | -0.71432 |

1

Name: Ag Energy: -92136.9129415

Ag 0.00000 0.00000 0.00000

27

Name: A Energy: -478190.3030124

|   |          |          |          |
|---|----------|----------|----------|
| C | -0.89655 | 0.31389  | 0.16433  |
| C | -2.06302 | 1.22091  | 0.39536  |
| C | 2.57701  | 0.37351  | 0.01026  |
| C | 0.13336  | 0.76957  | -0.92768 |
| C | 1.19901  | 0.59797  | 0.10345  |
| C | 0.23080  | 0.47587  | 1.22452  |
| C | 3.34159  | 0.11617  | 1.18608  |
| C | 4.71055  | -0.04934 | 1.09690  |
| C | 5.33782  | 0.03182  | -0.15699 |
| C | 4.60432  | 0.28144  | -1.32851 |
| C | 3.23503  | 0.44990  | -1.25234 |
| O | -2.33222 | 1.71487  | 1.47303  |
| O | -2.76455 | 1.42946  | -0.73527 |
| C | -3.91948 | 2.28897  | -0.60142 |
| H | -0.01261 | 1.82837  | -1.19010 |
| H | 0.43334  | -0.29168 | 1.97560  |
| H | 0.07942  | 1.42598  | 1.76478  |
| H | 2.84072  | 0.05872  | 2.14655  |
| H | 5.29990  | -0.24202 | 1.98627  |
| H | 6.41326  | -0.10247 | -0.22243 |
| H | 5.11311  | 0.34014  | -2.28409 |
| H | 2.65349  | 0.64609  | -2.14682 |
| H | -4.34016 | 2.36727  | -1.60219 |
| H | -4.63986 | 1.84478  | 0.08858  |
| H | -3.62082 | 3.26968  | -0.22663 |

Ag -1.71593 -1.65407 -0.08112

H 0.26038 0.21786 -1.86248

19

Name: 2a Energy: -289495.6685303

C 1.05330 -1.09288 -0.00000

C -0.28497 -0.62267 0.00000

C -0.52973 0.78854 0.00000

C 0.58471 1.66996 0.00000

C 1.87142 1.19399 -0.00000

C 2.10744 -0.20494 -0.00001

C -1.39726 -1.50496 -0.00000

C -2.68461 -1.01780 -0.00000

C -2.92554 0.37677 0.00000

C -1.86775 1.25751 0.00000

O 3.41750 -0.59182 -0.00002

H 0.40323 2.74110 0.00002

H 2.72671 1.86061 0.00000

H -1.21477 -2.57614 -0.00001

H -3.52401 -1.70660 -0.00001

H -3.94578 0.74720 -0.00000

H -2.04295 2.33002 -0.00000

H 3.45865 -1.55727 0.00013

H 1.23693 -2.16541 0.00006

26

Name: 1a Energy: -386036.4482026

C -1.05825 -1.69605 1.26863

C -0.12428 -1.55012 0.10848

---

|   |          |          |          |
|---|----------|----------|----------|
| C | -1.60260 | -1.09979 | 0.00273  |
| C | -1.01710 | -2.07075 | -0.97426 |
| C | 1.06255  | -0.68874 | 0.01985  |
| C | -1.90773 | 0.29667  | -0.30653 |
| O | -1.94671 | 0.75935  | -1.43147 |
| C | 1.44530  | -0.08962 | -1.19129 |
| C | 2.55397  | 0.75018  | -1.24229 |
| C | 3.30412  | 1.00193  | -0.09149 |
| C | 2.93522  | 0.40564  | 1.11403  |
| C | 1.82445  | -0.43419 | 1.16934  |
| O | -2.08785 | 1.03018  | 0.81737  |
| C | -2.27532 | 2.43530  | 0.59134  |
| H | -0.91424 | -1.01424 | 2.10238  |
| H | -1.40693 | -2.69098 | 1.54967  |
| H | -0.85595 | -1.70076 | -1.98253 |
| H | -1.34925 | -3.10854 | -0.91921 |
| H | 0.86285  | -0.26504 | -2.08866 |
| H | 2.83232  | 1.21205  | -2.18461 |
| H | 4.17061  | 1.65424  | -0.13631 |
| H | 3.51483  | 0.58998  | 2.01350  |
| H | 1.54641  | -0.90638 | 2.10599  |
| H | -2.40794 | 2.87682  | 1.57862  |
| H | -1.40193 | 2.86307  | 0.09312  |
| H | -3.15630 | 2.61101  | -0.03036 |

46

Name: TSene2 Energy: -675807.4035532

|   |          |          |          |
|---|----------|----------|----------|
| C | -2.15357 | -1.38503 | -0.52975 |
|---|----------|----------|----------|

---

|   |          |          |          |
|---|----------|----------|----------|
| C | -3.44602 | -0.61950 | -0.32441 |
| C | 1.19070  | -1.67989 | -0.03602 |
| C | -0.94427 | -0.56571 | -1.11203 |
| C | -0.10752 | -1.03165 | 0.07948  |
| C | -1.30921 | -1.70091 | 0.74240  |
| C | 1.63650  | -2.56317 | 0.97357  |
| C | 2.85152  | -3.22323 | 0.84924  |
| C | 3.64604  | -3.01943 | -0.28655 |
| C | 3.22755  | -2.14010 | -1.28706 |
| C | 2.01757  | -1.46330 | -1.15863 |
| O | -3.63895 | 0.23879  | 0.52916  |
| O | -4.36444 | -0.97548 | -1.21569 |
| C | -5.64527 | -0.30075 | -1.14143 |
| H | -1.11798 | 0.50937  | -1.18322 |
| H | -1.16420 | -2.76433 | 0.94543  |
| H | -1.68267 | -1.22269 | 1.64880  |
| H | 1.02029  | -2.73556 | 1.85110  |
| H | 3.17919  | -3.90589 | 1.62640  |
| H | 4.58869  | -3.54781 | -0.38852 |
| H | 3.84412  | -1.98161 | -2.16574 |
| H | 1.70144  | -0.77849 | -1.93858 |
| H | -6.24611 | -0.74079 | -1.93451 |
| H | -6.10175 | -0.47230 | -0.16534 |
| H | -5.51464 | 0.77099  | -1.30088 |
| H | -0.58617 | -0.91957 | -2.08111 |
| C | 3.72112  | 1.77217  | -0.16702 |
| C | 2.78913  | 1.07816  | 0.59583  |



---

|   |          |          |          |
|---|----------|----------|----------|
| C | 1.43076  | 1.43649  | 0.55694  |
| C | 1.03083  | 2.52954  | -0.26912 |
| C | 1.99493  | 3.21219  | -1.04580 |
| C | 3.32564  | 2.83648  | -0.99612 |
| H | 0.74010  | 0.07511  | 2.12246  |
| H | 4.76868  | 1.49256  | -0.11628 |
| H | 3.11111  | 0.26685  | 1.24033  |
| C | 0.42038  | 0.72002  | 1.31043  |
| C | -0.33216 | 2.95363  | -0.23437 |
| H | 1.68012  | 4.04468  | -1.66828 |
| H | 4.06543  | 3.36871  | -1.58455 |
| C | -1.26432 | 2.37070  | 0.59382  |
| C | -0.87139 | 1.30366  | 1.43474  |
| H | -0.62672 | 3.79539  | -0.85581 |
| H | -2.28044 | 2.74553  | 0.64621  |
| O | -1.70296 | 0.77688  | 2.33167  |
| H | -2.62206 | 0.82682  | 1.98291  |
| H | -2.35935 | -2.27065 | -1.13080 |

46

Name: TSene1 Energy: -767704.9628232

|   |          |         |          |
|---|----------|---------|----------|
| C | 2.38585  | 1.53709 | -0.99334 |
| C | 3.60422  | 0.83343 | -0.44931 |
| C | -0.89256 | 2.59003 | -0.28365 |
| C | 0.99585  | 0.87023 | -0.88086 |
| C | 0.42748  | 2.10225 | -0.42614 |
| C | 1.77817  | 2.74641 | -0.20718 |
| C | -1.11720 | 3.91395 | 0.17277  |

---

|    |          |          |          |
|----|----------|----------|----------|
| C  | -2.41031 | 4.39555  | 0.29554  |
| C  | -3.49494 | 3.56799  | -0.02735 |
| C  | -3.29129 | 2.25479  | -0.47173 |
| C  | -2.00311 | 1.76435  | -0.59920 |
| O  | 3.78890  | -0.38511 | -0.45161 |
| O  | 4.51079  | 1.68934  | -0.01337 |
| C  | 5.76367  | 1.14181  | 0.47381  |
| H  | 0.96591  | 0.11265  | 0.08574  |
| H  | 1.91648  | 3.73562  | -0.65194 |
| H  | 2.08064  | 2.79451  | 0.84398  |
| H  | -0.27111 | 4.54745  | 0.41883  |
| H  | -2.58468 | 5.40876  | 0.64067  |
| H  | -4.50629 | 3.94896  | 0.07474  |
| H  | -4.13601 | 1.61256  | -0.69536 |
| H  | -1.83953 | 0.74062  | -0.91537 |
| H  | 6.35907  | 2.00612  | 0.75907  |
| H  | 5.57625  | 0.49608  | 1.33326  |
| H  | 6.25250  | 0.57334  | -0.31864 |
| Ag | 2.33154  | -2.13327 | 0.02314  |
| H  | 0.53640  | 0.25005  | -1.65391 |
| C  | -1.35288 | -0.48624 | 1.93019  |
| C  | -2.72163 | -0.47533 | 1.84932  |
| C  | -3.40304 | -1.11075 | 0.77387  |
| C  | -2.63165 | -1.80534 | -0.21646 |
| C  | -1.21744 | -1.80500 | -0.10872 |
| C  | -0.58065 | -1.14235 | 0.92926  |
| H  | -5.39385 | -0.55121 | 1.40275  |

|   |          |          |          |
|---|----------|----------|----------|
| H | -0.82718 | 0.01039  | 2.73861  |
| H | -3.30792 | 0.03320  | 2.60934  |
| C | -4.81429 | -1.07120 | 0.64507  |
| C | -3.31055 | -2.43726 | -1.29291 |
| H | -0.62221 | -2.31700 | -0.86336 |
| C | -4.68208 | -2.37584 | -1.39179 |
| C | -5.44236 | -1.68542 | -0.41679 |
| H | -2.72861 | -2.96889 | -2.04071 |
| H | -5.18842 | -2.86163 | -2.21972 |
| H | -6.52333 | -1.65025 | -0.50537 |
| O | 0.76269  | -0.98272 | 0.97308  |
| H | 2.62510  | 1.83113  | -2.02166 |

27

Name: INTene3 Energy: -386300.5078706

|   |          |          |          |
|---|----------|----------|----------|
| C | -1.52565 | -0.00009 | -0.53364 |
| C | -2.89401 | -0.00048 | 0.12871  |
| C | 1.88132  | 0.00002  | 0.01132  |
| C | -0.53854 | 1.07975  | 0.03093  |
| C | 0.48597  | -0.00013 | 0.09370  |
| C | -0.53837 | -1.08011 | 0.03006  |
| C | 2.60130  | -1.23326 | -0.00772 |
| C | 3.98236  | -1.22589 | -0.03608 |
| C | 4.66847  | 0.00027  | -0.05133 |
| C | 3.98216  | 1.22630  | -0.03523 |
| C | 2.60110  | 1.23342  | -0.00682 |
| O | -3.01691 | -0.00187 | 1.33651  |
| O | -3.88185 | 0.00099  | -0.76035 |

---

|   |          |          |          |
|---|----------|----------|----------|
| C | -5.22834 | 0.00090  | -0.21621 |
| H | -0.87136 | 1.34684  | 1.04615  |
| H | -0.32157 | -1.98833 | -0.53654 |
| H | -0.87127 | -1.34819 | 1.04499  |
| H | 2.05761  | -2.17198 | 0.00597  |
| H | 4.53694  | -2.15758 | -0.04787 |
| H | 5.75422  | 0.00036  | -0.07721 |
| H | 4.53659  | 2.15809  | -0.04637 |
| H | 2.05725  | 2.17204  | 0.00754  |
| H | -5.88662 | 0.00273  | -1.08231 |
| H | -5.38368 | -0.89166 | 0.39193  |
| H | -5.38262 | 0.89160  | 0.39493  |
| H | -0.32198 | 1.98854  | -0.53484 |
| H | -1.58006 | 0.00039  | -1.62171 |

46

Name: INTene2 Energy: -767713.4671327

|   |          |         |          |
|---|----------|---------|----------|
| C | -0.89344 | 1.47616 | 0.53142  |
| C | -2.21107 | 2.10228 | 0.18025  |
| C | 2.48890  | 1.33228 | -0.44230 |
| C | -0.10308 | 0.80556 | -0.64560 |
| C | 1.14126  | 1.41645 | -0.08465 |
| C | 0.37314  | 2.31923 | 0.85057  |
| C | 3.45972  | 2.15868 | 0.19410  |
| C | 4.77277  | 2.14942 | -0.23573 |
| C | 5.15785  | 1.31365 | -1.29810 |
| C | 4.23244  | 0.45999 | -1.90593 |
| C | 2.91468  | 0.44576 | -1.47175 |

---

|    |          |          |          |
|----|----------|----------|----------|
| O  | -3.22401 | 1.43531  | -0.07916 |
| O  | -2.21006 | 3.41491  | 0.14726  |
| C  | -3.45832 | 4.07779  | -0.20390 |
| H  | -0.36029 | 1.20183  | -1.63629 |
| H  | 0.68886  | 2.37915  | 1.89446  |
| H  | 0.30544  | 3.33968  | 0.45198  |
| H  | 3.15108  | 2.81361  | 1.00223  |
| H  | 5.50559  | 2.79323  | 0.23847  |
| H  | 6.18774  | 1.32211  | -1.64026 |
| H  | 4.54530  | -0.19669 | -2.71041 |
| H  | 2.19183  | -0.21943 | -1.93072 |
| H  | -3.23246 | 5.14071  | -0.16554 |
| H  | -3.76538 | 3.77454  | -1.20554 |
| H  | -4.22964 | 3.81182  | 0.51965  |
| Ag | -3.16656 | -0.76490 | -0.20797 |
| H  | -0.16255 | -0.28975 | -0.68201 |
| C  | -0.05177 | -3.33624 | -0.94549 |
| C  | 1.29329  | -3.17087 | -0.76423 |
| C  | 1.81495  | -2.29801 | 0.24350  |
| C  | 0.88756  | -1.65649 | 1.13352  |
| C  | -0.48745 | -1.87839 | 0.96466  |
| C  | -1.00157 | -2.62837 | -0.12078 |
| H  | 3.88302  | -2.49616 | -0.30996 |
| H  | -0.44667 | -3.96790 | -1.73375 |
| H  | 1.99489  | -3.68687 | -1.41431 |
| C  | 3.18227  | -2.00883 | 0.36188  |
| C  | 1.39614  | -0.73502 | 2.09452  |

|   |          |          |          |
|---|----------|----------|----------|
| H | -1.19742 | -1.43162 | 1.65751  |
| C | 2.75751  | -0.49460 | 2.20473  |
| C | 3.65475  | -1.11465 | 1.32617  |
| H | 0.70201  | -0.27007 | 2.78964  |
| H | 3.12713  | 0.19310  | 2.95851  |
| H | 4.71687  | -0.90883 | 1.39769  |
| O | -2.26813 | -2.66261 | -0.41999 |
| H | -1.08250 | 0.73237  | 1.30712  |

46

Name: INTene1 Energy: -767737.5241766

|   |          |          |          |
|---|----------|----------|----------|
| C | -3.64436 | -0.06049 | 1.37028  |
| C | -3.90403 | -1.17462 | 0.38405  |
| C | -0.89809 | 2.18646  | 0.90846  |
| C | -2.19243 | 0.10721  | 1.78798  |
| C | -2.02638 | 1.29225  | 1.14496  |
| C | -3.47442 | 1.35060  | 0.66593  |
| C | -0.98557 | 3.16516  | -0.09779 |
| C | 0.13153  | 3.93537  | -0.43028 |
| C | 1.33828  | 3.74566  | 0.25050  |
| C | 1.42535  | 2.78903  | 1.26762  |
| C | 0.31826  | 2.01317  | 1.59334  |
| O | -3.13357 | -1.49841 | -0.53451 |
| O | -5.05736 | -1.77281 | 0.56272  |
| C | -5.41843 | -2.83685 | -0.36085 |
| H | 0.49559  | 1.60265  | -1.39608 |
| H | -4.07939 | 2.13286  | 1.13116  |
| H | -3.64573 | 1.36254  | -0.41521 |

---

|    |          |          |          |
|----|----------|----------|----------|
| H  | -1.92419 | 3.31605  | -0.62261 |
| H  | 0.05609  | 4.68919  | -1.20734 |
| H  | 2.20529  | 4.34566  | -0.00520 |
| H  | 2.36191  | 2.64081  | 1.79394  |
| H  | 0.39362  | 1.26173  | 2.37280  |
| H  | -6.39339 | -3.18129 | -0.02445 |
| H  | -5.46930 | -2.44136 | -1.37615 |
| H  | -4.67845 | -3.63644 | -0.30773 |
| Ag | -1.19573 | -0.49974 | -0.87931 |
| H  | -1.55208 | -0.51733 | 2.40204  |
| C  | 2.98367  | 1.05218  | -1.34827 |
| C  | 4.22448  | 0.65427  | -0.90778 |
| C  | 4.39994  | -0.55678 | -0.18707 |
| C  | 3.25507  | -1.37611 | 0.08149  |
| C  | 1.98154  | -0.93790 | -0.36958 |
| C  | 1.86723  | 0.24015  | -1.05805 |
| H  | 6.53927  | -0.36106 | 0.06422  |
| H  | 2.85462  | 1.96939  | -1.91300 |
| H  | 5.09455  | 1.26774  | -1.12104 |
| C  | 5.67329  | -0.98251 | 0.27212  |
| C  | 3.42782  | -2.58764 | 0.79771  |
| H  | 1.10181  | -1.54597 | -0.15860 |
| C  | 4.67752  | -2.97125 | 1.22949  |
| C  | 5.80980  | -2.16337 | 0.96542  |
| H  | 2.56062  | -3.21099 | 0.99749  |
| H  | 4.80006  | -3.90146 | 1.77488  |
| H  | 6.78761  | -2.48195 | 1.31113  |

O 0.59910 0.64197 -1.51480

H -4.39483 -0.09312 2.16215

26

Name: 4a Energy: -386050.5116913

C -1.66876 0.27530 0.92448

C -2.79770 0.29529 -0.08149

C 1.79651 -0.04639 0.14831

H -2.08460 0.29340 1.93810

C -0.62692 -0.81248 0.68039

C 0.37766 0.05964 0.45644

C -0.50585 1.28610 0.65620

C 2.56217 1.11609 -0.03253

C 3.92103 1.03302 -0.32894

C 4.53601 -0.21321 -0.44911

C 3.78368 -1.37817 -0.27115

C 2.42795 -1.29672 0.02502

O -2.84352 0.95944 -1.09417

O -3.76310 -0.58187 0.27863

C -4.85825 -0.69401 -0.64433

H -0.71186 -1.89372 0.68852

H -0.25298 1.91952 1.51296

H -0.66541 1.90621 -0.22891

H 2.08342 2.08627 0.05834

H 4.49995 1.94110 -0.46696

H 5.59469 -0.27902 -0.68012

H 4.25838 -2.35030 -0.36391

H 1.84635 -2.20312 0.16366



|   |          |          |          |
|---|----------|----------|----------|
| H | -5.53466 | -1.43071 | -0.21198 |
| H | -5.36215 | 0.26832  | -0.76176 |
| H | -4.50333 | -1.02521 | -1.62327 |

27

Name: TS1' Energy: -478171.0520228

|   |          |          |          |
|---|----------|----------|----------|
| C | 1.28096  | 1.23122  | 0.40805  |
| C | 2.18150  | 0.03032  | 0.30114  |
| C | 0.12912  | 0.23437  | 0.26737  |
| C | 1.06121  | -0.96169 | 0.39064  |
| C | 3.55460  | -0.10386 | 0.07568  |
| C | -1.22602 | 0.20554  | 0.18532  |
| O | -1.90039 | -0.89760 | 0.21664  |
| C | 4.13327  | -1.40147 | -0.03728 |
| C | 5.49552  | -1.53419 | -0.22923 |
| C | 6.29669  | -0.38420 | -0.31434 |
| C | 5.74721  | 0.90410  | -0.20797 |
| C | 4.38652  | 1.04962  | -0.01626 |
| O | -2.03448 | 1.32123  | 0.06509  |
| C | -1.44316 | 2.58798  | -0.23772 |
| H | 1.46187  | 1.99859  | -0.35884 |
| H | 1.39165  | 1.73271  | 1.38664  |
| H | 1.05929  | -1.73368 | -0.39396 |
| H | 1.04819  | -1.49806 | 1.35714  |
| H | 3.49432  | -2.27547 | 0.03045  |
| H | 5.94633  | -2.51642 | -0.31521 |
| H | 7.36620  | -0.49319 | -0.46720 |
| H | 6.38990  | 1.77445  | -0.27766 |

---

|    |          |          |          |
|----|----------|----------|----------|
| H  | 3.94132  | 2.03527  | 0.06771  |
| H  | -2.27057 | 3.27811  | -0.40025 |
| H  | -0.83561 | 2.94976  | 0.59695  |
| H  | -0.83649 | 2.52145  | -1.14603 |
| Ag | -3.96302 | -0.47466 | -0.12438 |

32

Name: TS1\_BF4 Energy: -744780.5775394

|   |          |          |          |
|---|----------|----------|----------|
| C | 0.61860  | 0.15359  | 0.75009  |
| C | 1.76746  | 0.20554  | -0.18070 |
| C | -0.08836 | 1.22404  | -0.18887 |
| C | 1.08996  | 1.05113  | -1.19425 |
| C | 3.10054  | -0.24218 | -0.05741 |
| C | -0.13240 | 2.60836  | 0.32744  |
| O | 0.39365  | 3.55172  | -0.24292 |
| C | 4.04962  | 0.05417  | -1.06945 |
| C | 5.34539  | -0.42068 | -0.96050 |
| C | 5.70679  | -1.19548 | 0.15104  |
| C | 4.78164  | -1.49956 | 1.15948  |
| C | 3.48493  | -1.02382 | 1.06272  |
| O | -0.75517 | 2.85452  | 1.51571  |
| C | -1.69292 | 1.93577  | 2.08306  |
| H | 0.86305  | 0.41408  | 1.78884  |
| H | 0.12476  | -0.83118 | 0.75652  |
| H | 1.62807  | 1.98496  | -1.42724 |
| H | 0.88039  | 0.53497  | -2.13843 |
| H | 3.74722  | 0.65802  | -1.91845 |
| H | 6.07845  | -0.19697 | -1.72764 |

---

|    |          |          |          |
|----|----------|----------|----------|
| H  | 6.72373  | -1.56737 | 0.23222  |
| H  | 5.08233  | -2.10368 | 2.00827  |
| H  | 2.75030  | -1.25160 | 1.82776  |
| H  | -2.00636 | 2.38569  | 3.02644  |
| H  | -2.56692 | 1.81769  | 1.43188  |
| H  | -1.27440 | 0.94622  | 2.27596  |
| Ag | -1.96669 | 0.37427  | -0.77619 |
| B  | -2.31196 | -2.21933 | 0.25105  |
| F  | -2.82470 | -3.45629 | 0.48597  |
| F  | -1.03531 | -2.26045 | -0.36717 |
| F  | -2.20694 | -1.42314 | 1.40604  |
| F  | -3.19214 | -1.48682 | -0.67913 |

32

Name: TS1'\_BF4Energy: -744766.1505884

|   |          |          |          |
|---|----------|----------|----------|
| C | -2.32932 | 0.92441  | -0.63931 |
| C | -3.35234 | -0.04576 | -0.09066 |
| C | -1.35601 | -0.20960 | -0.32615 |
| C | -2.40023 | -1.18293 | 0.19954  |
| C | -4.73696 | 0.07340  | 0.08203  |
| C | -0.00171 | -0.43446 | -0.53827 |
| O | 0.54448  | -1.56199 | -0.33790 |
| C | -5.48603 | -1.00733 | 0.62681  |
| C | -6.85390 | -0.88536 | 0.79713  |
| C | -7.49763 | 0.30624  | 0.43163  |
| C | -6.77689 | 1.38286  | -0.10661 |
| C | -5.40868 | 1.27410  | -0.28251 |
| O | 0.82158  | 0.54279  | -1.01263 |

---

|    |          |          |          |
|----|----------|----------|----------|
| C  | 0.69329  | 1.89474  | -0.53412 |
| H  | -2.23924 | 1.86935  | -0.07638 |
| H  | -2.48067 | 1.20151  | -1.69785 |
| H  | -2.33553 | -1.48500 | 1.25870  |
| H  | -2.58269 | -2.10264 | -0.38311 |
| H  | -4.96914 | -1.92006 | 0.90351  |
| H  | -7.42930 | -1.70606 | 1.21181  |
| H  | -8.57087 | 0.39699  | 0.56779  |
| H  | -7.29359 | 2.29582  | -0.38252 |
| H  | -4.83395 | 2.09568  | -0.69670 |
| H  | 1.69537  | 2.31453  | -0.60916 |
| H  | -0.01561 | 2.45786  | -1.14924 |
| H  | 0.37510  | 1.89617  | 0.51159  |
| Ag | 2.70371  | -1.13258 | -0.17989 |
| F  | 3.17719  | 0.83157  | 1.38564  |
| F  | 3.90228  | 1.80923  | -0.55694 |
| F  | 4.70780  | -0.26264 | 0.07093  |
| F  | 5.34413  | 1.63543  | 1.24349  |
| B  | 4.30669  | 1.08128  | 0.55908  |

46

Name: TS-N1 Energy: -767686.2107067

|   |         |          |          |
|---|---------|----------|----------|
| C | 1.58697 | 1.49551  | 0.00023  |
| C | 0.86230 | 2.63199  | -0.45030 |
| C | 4.18579 | -0.82668 | -0.32573 |
| C | 1.79519 | 0.22428  | -0.85026 |
| C | 3.21695 | 0.19059  | -0.37970 |
| C | 3.08910 | 1.51943  | 0.28581  |

---

|    |          |          |          |
|----|----------|----------|----------|
| C  | 5.43432  | -0.59946 | 0.32324  |
| C  | 6.41508  | -1.57563 | 0.31282  |
| C  | 6.17659  | -2.79751 | -0.33487 |
| C  | 4.95319  | -3.04579 | -0.97647 |
| C  | 3.96493  | -2.07737 | -0.97252 |
| O  | -0.33771 | 2.58320  | -0.86769 |
| O  | 1.49317  | 3.81006  | -0.35325 |
| C  | 0.71235  | 5.00117  | -0.59022 |
| H  | 1.71525  | 0.41979  | -1.93234 |
| H  | 3.47675  | 1.57760  | 1.31090  |
| H  | 3.58990  | 2.31944  | -0.28542 |
| H  | 5.61215  | 0.34861  | 0.82073  |
| H  | 7.36577  | -1.39958 | 0.80489  |
| H  | 6.94782  | -3.56181 | -0.33783 |
| H  | 4.78443  | -3.99619 | -1.47165 |
| H  | 3.01673  | -2.26296 | -1.46707 |
| H  | 1.38678  | 5.83181  | -0.38626 |
| H  | 0.36774  | 5.03293  | -1.62534 |
| H  | -0.14973 | 5.03299  | 0.07998  |
| Ag | -1.12368 | 1.00534  | 0.45858  |
| H  | 1.23907  | -0.70107 | -0.65274 |
| C  | -2.10912 | -0.51881 | 1.89004  |
| C  | -3.25348 | 0.01159  | 1.26650  |
| C  | -3.89156 | -0.67305 | 0.19252  |
| C  | -3.34978 | -1.93356 | -0.22961 |
| C  | -2.20050 | -2.46277 | 0.42138  |
| C  | -1.59383 | -1.78994 | 1.45808  |

|   |          |          |          |
|---|----------|----------|----------|
| H | -5.46211 | 0.78870  | -0.10709 |
| H | -1.76671 | -0.09696 | 2.83445  |
| H | -3.72451 | 0.89869  | 1.68226  |
| C | -5.05503 | -0.16201 | -0.44038 |
| C | -3.99697 | -2.62844 | -1.28484 |
| H | -1.80471 | -3.42753 | 0.11975  |
| C | -5.12224 | -2.10448 | -1.88332 |
| C | -5.65872 | -0.86394 | -1.45917 |
| H | -3.59547 | -3.58397 | -1.60944 |
| H | -5.60898 | -2.64909 | -2.68650 |
| H | -6.54943 | -0.47130 | -1.93871 |
| O | -0.49589 | -2.34083 | 2.04589  |
| H | -0.27358 | -1.86137 | 2.85519  |

46

Name: INT-N1 Energy: -767689.3509712

|   |          |          |          |
|---|----------|----------|----------|
| C | 1.19523  | 1.79068  | 0.02237  |
| C | 0.51873  | 2.97104  | -0.36754 |
| C | 3.48104  | -0.79886 | -0.28117 |
| C | 1.29751  | 0.56124  | -0.91083 |
| C | 2.67524  | 0.34413  | -0.37918 |
| C | 2.71247  | 1.68710  | 0.27159  |
| C | 4.71307  | -0.75375 | 0.42856  |
| C | 5.51821  | -1.87686 | 0.49372  |
| C | 5.11183  | -3.06148 | -0.13780 |
| C | 3.89852  | -3.12843 | -0.84029 |
| C | 3.08614  | -2.01179 | -0.91295 |
| O | -0.62731 | 2.99739  | -0.92658 |

---

|    |          |          |          |
|----|----------|----------|----------|
| O  | 1.13047  | 4.12095  | -0.06917 |
| C  | 0.38490  | 5.34033  | -0.26838 |
| H  | 1.32408  | 0.85588  | -1.97271 |
| H  | 3.13351  | 1.72921  | 1.28202  |
| H  | 3.27366  | 2.40860  | -0.34535 |
| H  | 5.01293  | 0.16750  | 0.91632  |
| H  | 6.45796  | -1.84560 | 1.03379  |
| H  | 5.74465  | -3.94154 | -0.08018 |
| H  | 3.60296  | -4.05385 | -1.32225 |
| H  | 2.14571  | -2.04849 | -1.45253 |
| H  | 1.04228  | 6.13663  | 0.07679  |
| H  | 0.14231  | 5.47190  | -1.32419 |
| H  | -0.53722 | 5.32323  | 0.31681  |
| Ag | -1.87571 | 1.36621  | -0.25714 |
| H  | 0.61998  | -0.29661 | -0.82455 |
| C  | -1.71521 | 0.07430  | 1.67843  |
| C  | -2.92224 | -0.38623 | 1.13282  |
| C  | -2.97648 | -1.62868 | 0.42669  |
| C  | -1.77532 | -2.40435 | 0.32034  |
| C  | -0.55722 | -1.89361 | 0.84998  |
| C  | -0.50185 | -0.67029 | 1.48563  |
| H  | -5.09012 | -1.53991 | -0.02238 |
| H  | -1.70104 | 0.91157  | 2.37184  |
| H  | -3.85285 | 0.11985  | 1.37866  |
| C  | -4.18280 | -2.12893 | -0.12067 |
| C  | -1.83434 | -3.65588 | -0.34357 |
| H  | 0.35945  | -2.46598 | 0.74303  |

|   |          |          |          |
|---|----------|----------|----------|
| C | -3.02109 | -4.11504 | -0.87265 |
| C | -4.20500 | -3.34891 | -0.76067 |
| H | -0.92933 | -4.25075 | -0.42343 |
| H | -3.05313 | -5.07645 | -1.37488 |
| H | -5.13241 | -3.72922 | -1.17531 |
| O | 0.67696  | -0.15522 | 1.90686  |
| H | 0.74595  | 0.77287  | 1.50869  |

27

Name: INT-N2 Energy: -386300.5995466

|   |          |          |          |
|---|----------|----------|----------|
| C | -1.52559 | -0.00002 | -0.54675 |
| C | -2.88622 | -0.00015 | 0.12366  |
| C | 1.87734  | 0.00001  | 0.01121  |
| C | -0.53852 | 1.07904  | 0.01932  |
| C | 0.48425  | -0.00003 | 0.08865  |
| C | -0.53847 | -1.07915 | 0.01906  |
| C | 2.59476  | -1.23327 | -0.00568 |
| C | 3.97517  | -1.22598 | -0.03087 |
| C | 4.66061  | 0.00007  | -0.04484 |
| C | 3.97512  | 1.22609  | -0.03063 |
| C | 2.59472  | 1.23333  | -0.00545 |
| O | -2.99894 | -0.00053 | 1.33251  |
| O | -3.88069 | 0.00028  | -0.75644 |
| C | -5.21960 | 0.00026  | -0.19574 |
| H | -0.87561 | 1.34659  | 1.03257  |
| H | -0.31737 | -1.98558 | -0.54768 |
| H | -0.87556 | -1.34713 | 1.03218  |
| H | 2.04859  | -2.17009 | 0.00707  |



|   |          |          |          |
|---|----------|----------|----------|
| H | 4.53003  | -2.15705 | -0.04118 |
| H | 5.74603  | 0.00009  | -0.06824 |
| H | 4.52995  | 2.15718  | -0.04077 |
| H | 2.04851  | 2.17012  | 0.00748  |
| H | -5.88887 | 0.00019  | -1.05302 |
| H | -5.36510 | -0.89109 | 0.41635  |
| H | -5.36515 | 0.89168  | 0.41622  |
| H | -0.31753 | 1.98573  | -0.54706 |
| H | -1.58221 | 0.00012  | -1.63409 |

46

Name: TS-N2 Energy: -767687.6244165

|   |          |          |          |
|---|----------|----------|----------|
| C | 1.25747  | 1.75378  | 0.03474  |
| C | 0.67154  | 3.01294  | -0.34627 |
| C | 3.32626  | -0.97995 | -0.27802 |
| C | 1.31852  | 0.58246  | -0.99290 |
| C | 2.63715  | 0.23499  | -0.39043 |
| C | 2.77576  | 1.56058  | 0.27815  |
| C | 4.50666  | -1.06943 | 0.51027  |
| C | 5.18844  | -2.26946 | 0.60374  |
| C | 4.70795  | -3.39710 | -0.07830 |
| C | 3.54442  | -3.33038 | -0.86028 |
| C | 2.85478  | -2.13592 | -0.96185 |
| O | -0.47278 | 3.12765  | -0.86898 |
| O | 1.39119  | 4.09281  | -0.06497 |
| C | 0.76941  | 5.38232  | -0.27668 |
| H | 1.43411  | 0.94470  | -2.02543 |
| H | 3.18163  | 1.57308  | 1.29341  |

---

|    |          |          |          |
|----|----------|----------|----------|
| H  | 3.37270  | 2.24810  | -0.34083 |
| H  | 4.86201  | -0.19126 | 1.03823  |
| H  | 6.08782  | -2.34236 | 1.20499  |
| H  | 5.24401  | -4.33764 | 0.00150  |
| H  | 3.19131  | -4.21345 | -1.38136 |
| H  | 1.95478  | -2.06860 | -1.56339 |
| H  | 1.50276  | 6.11099  | 0.06329  |
| H  | 0.54460  | 5.52287  | -1.33504 |
| H  | -0.15043 | 5.45687  | 0.30632  |
| Ag | -1.80551 | 1.50560  | -0.23989 |
| H  | 0.56416  | -0.21211 | -0.98799 |
| C  | -1.71831 | 0.14736  | 1.62310  |
| C  | -2.93581 | -0.35441 | 1.13863  |
| C  | -2.98835 | -1.59497 | 0.43955  |
| C  | -1.77109 | -2.34040 | 0.28578  |
| C  | -0.54739 | -1.80451 | 0.76633  |
| C  | -0.48051 | -0.56997 | 1.40192  |
| H  | -5.12055 | -1.56001 | 0.07792  |
| H  | -1.70339 | 0.97325  | 2.33155  |
| H  | -3.86636 | 0.14372  | 1.40042  |
| C  | -4.20421 | -2.12784 | -0.05618 |
| C  | -1.83041 | -3.59773 | -0.37077 |
| H  | 0.37173  | -2.36896 | 0.64064  |
| C  | -3.02622 | -4.08761 | -0.84758 |
| C  | -4.22428 | -3.35015 | -0.69047 |
| H  | -0.91554 | -4.17151 | -0.48630 |
| H  | -3.05551 | -5.05222 | -1.34410 |

---

|   |          |          |          |
|---|----------|----------|----------|
| H | -5.15811 | -3.75497 | -1.06547 |
| O | 0.67431  | -0.02202 | 1.76827  |
| H | 0.78509  | 0.96144  | 1.17722  |

64

Name: H Energy: -1056915.2710629

|   |         |          |          |
|---|---------|----------|----------|
| C | 2.75590 | -0.47597 | 0.12580  |
| C | 2.59831 | -1.91827 | 0.41889  |
| C | 0.99849 | 2.45599  | -0.00591 |
| C | 1.80500 | 0.13541  | -0.93358 |
| C | 1.11615 | 0.96217  | 0.19981  |
| C | 2.27944 | 0.54872  | 1.17186  |
| C | 0.80491 | 3.27732  | 1.11511  |
| C | 0.63883 | 4.65269  | 0.97124  |
| C | 0.66542 | 5.23370  | -0.29938 |
| C | 0.85411 | 4.42616  | -1.41982 |
| C | 1.01534 | 3.04690  | -1.27281 |
| O | 2.47931 | -2.43853 | 1.52815  |
| O | 2.59700 | -2.66829 | -0.71372 |
| C | 2.49117 | -4.08304 | -0.52214 |
| H | 1.18344 | -0.58385 | -1.46856 |
| H | 2.96491 | 1.38647  | 1.30174  |
| H | 2.01451 | 0.15636  | 2.15093  |
| H | 0.75782 | 2.83051  | 2.10417  |
| H | 0.48268 | 5.27021  | 1.85059  |
| H | 0.53516 | 6.30569  | -0.41296 |
| H | 0.86510 | 4.86526  | -2.41316 |
| H | 1.12332 | 2.42838  | -2.15725 |

---

|    |          |          |          |
|----|----------|----------|----------|
| H  | 2.53899  | -4.51850 | -1.51994 |
| H  | 3.31191  | -4.45216 | 0.09843  |
| H  | 1.54477  | -4.34270 | -0.04140 |
| H  | 2.29992  | 0.77027  | -1.66694 |
| C  | -2.65849 | 1.85045  | -2.03443 |
| C  | -1.85328 | 1.73968  | -0.90410 |
| C  | -1.28661 | 0.51472  | -0.54667 |
| C  | -1.57376 | -0.62667 | -1.34787 |
| C  | -2.36594 | -0.49141 | -2.50921 |
| C  | -2.89874 | 0.73773  | -2.85261 |
| H  | -0.65563 | 1.03794  | 1.45530  |
| H  | -3.10130 | 2.81029  | -2.28167 |
| H  | -1.68207 | 2.60557  | -0.27687 |
| C  | -0.32890 | 0.40661  | 0.61438  |
| C  | -1.13917 | -1.91726 | -0.91424 |
| H  | -2.58396 | -1.37508 | -3.10062 |
| H  | -3.52266 | 0.83490  | -3.73558 |
| C  | -0.51444 | -2.08823 | 0.30564  |
| C  | -0.26515 | -0.98685 | 1.12865  |
| H  | -1.34672 | -2.77540 | -1.54374 |
| H  | -0.29952 | -3.08326 | 0.68184  |
| O  | 0.26372  | -1.12937 | 2.34958  |
| H  | 0.86667  | -1.90232 | 2.36329  |
| Ag | 4.86513  | -0.37393 | -0.33361 |
| C  | -4.40536 | -3.05929 | -0.61115 |
| C  | -3.64809 | -2.59442 | 0.45628  |
| C  | -3.73673 | -1.24520 | 0.88898  |

---

|   |          |          |          |
|---|----------|----------|----------|
| C | -4.66099 | -0.38000 | 0.20827  |
| C | -5.41378 | -0.87830 | -0.86047 |
| C | -5.28113 | -2.19779 | -1.28616 |
| H | -2.30609 | -1.38031 | 2.51830  |
| H | -4.31767 | -4.09632 | -0.92351 |
| H | -2.98840 | -3.26951 | 0.99133  |
| C | -2.90120 | -0.72172 | 1.89893  |
| C | -4.76633 | 0.98637  | 0.64048  |
| H | -6.10181 | -0.20928 | -1.37126 |
| H | -5.86674 | -2.56202 | -2.12467 |
| C | -3.95022 | 1.49167  | 1.59988  |
| C | -2.91140 | 0.68216  | 2.23745  |
| H | -5.50423 | 1.61870  | 0.15134  |
| H | -4.00010 | 2.53322  | 1.90277  |
| O | -2.04673 | 1.20710  | 2.98364  |

64

Name: TS6 Energy: -1056911.2185315

|   |          |          |          |
|---|----------|----------|----------|
| C | -2.64753 | -0.80364 | -0.11643 |
| C | -2.13078 | -2.18733 | -0.21238 |
| C | -1.48067 | 2.42620  | -0.29871 |
| C | -1.98989 | 0.13127  | 0.92465  |
| C | -1.30861 | 0.91940  | -0.25222 |
| C | -2.30164 | 0.19241  | -1.23596 |
| C | -1.10109 | 3.10642  | -1.46614 |
| C | -1.26569 | 4.48496  | -1.57219 |
| C | -1.81519 | 5.21331  | -0.51442 |
| C | -2.19411 | 4.54816  | 0.65019  |

---

|   |          |          |          |
|---|----------|----------|----------|
| C | -2.02865 | 3.16513  | 0.75504  |
| O | -1.84566 | -2.79837 | -1.24407 |
| O | -1.99446 | -2.76376 | 1.00761  |
| C | -1.51679 | -4.11419 | 1.00882  |
| H | -1.32114 | -0.35216 | 1.63854  |
| H | -3.12269 | 0.87529  | -1.45606 |
| H | -1.91859 | -0.21127 | -2.16794 |
| H | -0.64291 | 2.55773  | -2.28164 |
| H | -0.95433 | 4.99204  | -2.48034 |
| H | -1.94010 | 6.28887  | -0.59638 |
| H | -2.61353 | 5.10292  | 1.48459  |
| H | -2.30180 | 2.67341  | 1.68212  |
| H | -1.51696 | -4.42343 | 2.05374  |
| H | -2.17216 | -4.75746 | 0.41613  |
| H | -0.50525 | -4.16435 | 0.59954  |
| H | -2.70465 | 0.73865  | 1.47700  |
| C | 1.75571  | 2.35132  | 2.59184  |
| C | 1.06427  | 2.08590  | 1.42040  |
| C | 0.97901  | 0.77858  | 0.90723  |
| C | 1.65333  | -0.25961 | 1.60770  |
| C | 2.35714  | 0.03156  | 2.79851  |
| C | 2.40452  | 1.31953  | 3.29180  |
| H | 0.73053  | 1.23899  | -1.17541 |
| H | 1.81520  | 3.37231  | 2.95675  |
| H | 0.61837  | 2.89986  | 0.86758  |
| C | 0.22246  | 0.50050  | -0.35383 |
| C | 1.65659  | -1.58425 | 1.07425  |

---

|    |          |          |          |
|----|----------|----------|----------|
| H  | 2.88029  | -0.77513 | 3.30414  |
| H  | 2.95295  | 1.53807  | 4.20281  |
| C  | 1.10422  | -1.85211 | -0.15052 |
| C  | 0.47417  | -0.82894 | -0.88587 |
| H  | 2.17076  | -2.36738 | 1.62266  |
| H  | 1.20683  | -2.83036 | -0.60762 |
| O  | 0.01900  | -1.08912 | -2.12588 |
| H  | -0.43612 | -1.95918 | -2.12533 |
| Ag | -4.75815 | -1.18248 | 0.14654  |
| C  | 5.17444  | -2.90773 | -0.77090 |
| C  | 4.23624  | -2.16502 | -1.45745 |
| C  | 4.04276  | -0.78574 | -1.17967 |
| C  | 4.84799  | -0.17856 | -0.16199 |
| C  | 5.80584  | -0.96256 | 0.52005  |
| C  | 5.96972  | -2.30283 | 0.22785  |
| H  | 2.44308  | -0.46524 | -2.61235 |
| H  | 5.30615  | -3.96169 | -0.99908 |
| H  | 3.62431  | -2.62838 | -2.22725 |
| C  | 3.04110  | -0.02261 | -1.82422 |
| C  | 4.64826  | 1.20667  | 0.13143  |
| H  | 6.41368  | -0.49013 | 1.28789  |
| H  | 6.70804  | -2.89279 | 0.76277  |
| C  | 3.66555  | 1.92304  | -0.48612 |
| C  | 2.79555  | 1.31873  | -1.47157 |
| H  | 5.27592  | 1.67050  | 0.88839  |
| H  | 3.47624  | 2.96144  | -0.23558 |
| O  | 1.75254  | 1.95843  | -1.90793 |

64

Name: I Energy: -1056962.0737626

|   |          |          |          |
|---|----------|----------|----------|
| C | 0.57908  | 1.94175  | -0.47477 |
| C | 0.50106  | 3.39983  | -0.59970 |
| C | 0.77218  | -1.02446 | -0.36796 |
| C | 1.33064  | 1.15358  | -1.55977 |
| C | 1.77294  | 0.13173  | -0.44809 |
| C | 1.49453  | 1.28682  | 0.57554  |
| C | -0.01243 | -1.28971 | 0.76353  |
| C | -0.90914 | -2.36161 | 0.78611  |
| C | -1.04423 | -3.18760 | -0.32671 |
| C | -0.27047 | -2.93485 | -1.46133 |
| C | 0.62697  | -1.86923 | -1.48029 |
| O | 0.44008  | 4.04140  | -1.63804 |
| O | 0.49563  | 4.02182  | 0.62795  |
| C | 0.39324  | 5.44505  | 0.57649  |
| H | 2.18918  | 1.72157  | -1.93218 |
| H | 1.08701  | 1.04739  | 1.55834  |
| H | 2.41309  | 1.86584  | 0.73116  |
| H | 0.07422  | -0.66428 | 1.64501  |
| H | -1.50619 | -2.54189 | 1.67384  |
| H | -1.74819 | -4.01179 | -0.31181 |
| H | -0.36380 | -3.57355 | -2.33542 |
| H | 1.22819  | -1.68101 | -2.36322 |
| H | 0.45306  | 5.78764  | 1.61076  |
| H | 1.20483  | 5.87790  | -0.01461 |
| H | -0.55702 | 5.75554  | 0.12934  |



---

|    |          |          |          |
|----|----------|----------|----------|
| Ag | -1.45200 | 1.25171  | -0.30562 |
| H  | 0.79221  | 0.74615  | -2.41501 |
| C  | -3.81294 | 1.32988  | 0.16748  |
| C  | -3.93257 | 0.38192  | -0.84583 |
| C  | -4.11062 | -0.99403 | -0.54344 |
| C  | -4.18944 | -1.38503 | 0.83303  |
| C  | -4.03641 | -0.41068 | 1.85189  |
| C  | -3.84876 | 0.91660  | 1.53694  |
| H  | -4.18152 | -1.66613 | -2.59647 |
| H  | -3.84132 | 2.39119  | -0.07075 |
| H  | -3.95279 | 0.70455  | -1.88286 |
| C  | -4.25269 | -1.97501 | -1.55750 |
| C  | -4.42079 | -2.75307 | 1.13481  |
| H  | -4.07231 | -0.70464 | 2.89565  |
| C  | -4.57109 | -3.67959 | 0.12796  |
| C  | -4.48401 | -3.29108 | -1.23114 |
| H  | -4.48269 | -3.05513 | 2.17623  |
| H  | -4.75523 | -4.72067 | 0.37545  |
| H  | -4.59729 | -4.03575 | -2.01227 |
| O  | -3.71337 | 1.81913  | 2.54551  |
| H  | -3.45305 | 2.67617  | 2.18251  |
| C  | 5.18663  | -1.00731 | -1.83297 |
| C  | 5.90370  | -1.29613 | -0.70268 |
| C  | 5.29000  | -1.20935 | 0.57064  |
| C  | 3.92114  | -0.78338 | 0.65998  |
| C  | 3.19788  | -0.41058 | -0.52274 |
| C  | 3.83709  | -0.58525 | -1.74369 |

|   |         |          |          |
|---|---------|----------|----------|
| H | 7.04254 | -1.86235 | 1.64678  |
| H | 5.64499 | -1.09939 | -2.81587 |
| H | 6.94086 | -1.61091 | -0.77243 |
| C | 6.00521 | -1.55344 | 1.74685  |
| C | 3.33248 | -0.77311 | 1.95584  |
| C | 4.04799 | -1.12505 | 3.07827  |
| C | 5.40416 | -1.51014 | 2.98243  |
| H | 2.29350 | -0.50473 | 2.06210  |
| H | 3.56034 | -1.11092 | 4.04871  |
| H | 5.95923 | -1.77913 | 3.87581  |
| O | 3.14195 | -0.35883 | -2.90637 |
| H | 3.74977 | -0.43519 | -3.65203 |

64

Name: TS7 Energy: -1056938.5662287

|   |          |          |          |
|---|----------|----------|----------|
| C | -0.05794 | 1.89009  | -0.11702 |
| C | -0.70506 | 3.01845  | -0.60667 |
| C | 1.00802  | -0.64384 | 1.27680  |
| C | 0.12654  | 0.54296  | -0.82765 |
| C | 1.37413  | 0.27057  | 0.10766  |
| C | 1.32464  | 1.80167  | 0.49084  |
| C | 0.25182  | -0.17611 | 2.36350  |
| C | -0.05280 | -1.00688 | 3.44207  |
| C | 0.37457  | -2.33495 | 3.45405  |
| C | 1.10128  | -2.82329 | 2.36677  |
| C | 1.41341  | -1.98612 | 1.29460  |
| O | -1.80199 | 3.01552  | -1.29103 |
| O | -0.13805 | 4.21831  | -0.29838 |

---

|    |          |          |          |
|----|----------|----------|----------|
| C  | -0.93137 | 5.37742  | -0.55445 |
| H  | 0.42126  | 0.66336  | -1.87516 |
| H  | 1.44120  | 2.02884  | 1.55621  |
| H  | 2.08343  | 2.37867  | -0.05332 |
| H  | -0.10957 | 0.84545  | 2.35946  |
| H  | -0.64082 | -0.61734 | 4.26673  |
| H  | 0.14322  | -2.97995 | 4.29664  |
| H  | 1.44337  | -3.85477 | 2.35848  |
| H  | 1.99916  | -2.37410 | 0.46951  |
| H  | -0.33581 | 6.22391  | -0.20796 |
| H  | -1.15186 | 5.48347  | -1.61946 |
| H  | -1.87853 | 5.33656  | -0.00534 |
| Ag | -2.63931 | 1.29967  | -0.14750 |
| H  | -0.62625 | -0.24790 | -0.79063 |
| C  | -4.08745 | -0.32483 | 0.76252  |
| C  | -4.07158 | -0.62521 | -0.60727 |
| C  | -3.17840 | -1.60875 | -1.12403 |
| C  | -2.31707 | -2.29472 | -0.20629 |
| C  | -2.38053 | -2.00821 | 1.18194  |
| C  | -3.24436 | -1.05233 | 1.66336  |
| H  | -3.75856 | -1.37499 | -3.19380 |
| H  | -4.86890 | 0.31818  | 1.16374  |
| H  | -4.80235 | -0.16921 | -1.26859 |
| C  | -3.10151 | -1.90281 | -2.50827 |
| C  | -1.39048 | -3.23742 | -0.72168 |
| H  | -1.71903 | -2.51960 | 1.86961  |
| C  | -1.33144 | -3.49407 | -2.07233 |

---

|   |          |          |          |
|---|----------|----------|----------|
| C | -2.19595 | -2.82874 | -2.97484 |
| H | -0.71126 | -3.72520 | -0.03116 |
| H | -0.61143 | -4.21271 | -2.45218 |
| H | -2.13911 | -3.04650 | -4.03671 |
| O | -3.27974 | -0.80492 | 3.00142  |
| H | -3.88755 | -0.07626 | 3.18119  |
| C | 3.75464  | -1.34259 | -2.45590 |
| C | 4.98983  | -0.93794 | -2.02216 |
| C | 5.11816  | -0.21252 | -0.81165 |
| C | 3.93418  | 0.13339  | -0.07821 |
| C | 2.63826  | -0.19958 | -0.59449 |
| C | 2.58720  | -0.99707 | -1.72998 |
| H | 7.27350  | -0.11354 | -0.88797 |
| H | 3.65478  | -1.93602 | -3.36290 |
| H | 5.88270  | -1.19220 | -2.58610 |
| C | 6.39386  | 0.14803  | -0.30535 |
| C | 4.10934  | 0.77592  | 1.17996  |
| C | 5.36189  | 1.09572  | 1.65364  |
| C | 6.52036  | 0.79650  | 0.90048  |
| H | 3.24294  | 0.98738  | 1.79052  |
| H | 5.46054  | 1.57698  | 2.62226  |
| H | 7.50124  | 1.06276  | 1.28225  |
| O | 1.37470  | -1.49096 | -2.14179 |
| H | 1.48465  | -1.92946 | -2.99409 |

64

Name: TS8 Energy: -1056940.9919921

|   |          |         |          |
|---|----------|---------|----------|
| C | -0.23006 | 1.60603 | -0.45586 |
|---|----------|---------|----------|

---

|    |          |          |          |
|----|----------|----------|----------|
| C  | 0.19983  | 2.91016  | -0.10988 |
| C  | -1.30543 | -1.27589 | -0.89487 |
| C  | -0.34242 | 0.52447  | 0.63828  |
| C  | -1.63938 | -0.02368 | -0.08341 |
| C  | -1.66706 | 1.32093  | -0.89926 |
| C  | -1.09748 | -1.26898 | -2.27768 |
| C  | -0.75970 | -2.44052 | -2.96121 |
| C  | -0.61816 | -3.64323 | -2.27314 |
| C  | -0.81598 | -3.66294 | -0.88933 |
| C  | -1.15525 | -2.49436 | -0.21166 |
| O  | 1.16014  | 3.20391  | 0.68139  |
| O  | -0.45887 | 3.92366  | -0.70301 |
| C  | 0.06385  | 5.24329  | -0.50884 |
| H  | -0.56595 | 0.94936  | 1.61926  |
| H  | -1.86339 | 1.26056  | -1.97182 |
| H  | -2.39780 | 2.01659  | -0.47388 |
| H  | -1.16021 | -0.34368 | -2.83522 |
| H  | -0.59543 | -2.40260 | -4.03389 |
| H  | -0.35339 | -4.55279 | -2.80378 |
| H  | -0.70980 | -4.59286 | -0.33709 |
| H  | -1.28948 | -2.51722 | 0.86405  |
| H  | -0.57940 | 5.89921  | -1.09587 |
| H  | 0.03256  | 5.52602  | 0.54611  |
| H  | 1.09625  | 5.30906  | -0.86335 |
| Ag | 2.75449  | 1.75770  | 0.59076  |
| H  | 0.45310  | -0.21433 | 0.75506  |
| C  | 3.71153  | 0.66088  | -1.19639 |

---

|   |          |          |          |
|---|----------|----------|----------|
| C | 4.60760  | 0.03682  | -0.31864 |
| C | 4.33112  | -1.25571 | 0.20574  |
| C | 3.12253  | -1.90736 | -0.21327 |
| C | 2.21853  | -1.24954 | -1.08228 |
| C | 2.45195  | 0.03784  | -1.55437 |
| H | 6.12844  | -1.41748 | 1.39846  |
| H | 3.99497  | 1.56724  | -1.72812 |
| H | 5.56451  | 0.50541  | -0.10089 |
| C | 5.21304  | -1.91997 | 1.09621  |
| C | 2.84680  | -3.20681 | 0.29584  |
| H | 1.29822  | -1.74447 | -1.36042 |
| C | 3.72070  | -3.82330 | 1.16157  |
| C | 4.91698  | -3.17915 | 1.56636  |
| H | 1.92669  | -3.69368 | -0.01187 |
| H | 3.49567  | -4.81587 | 1.54077  |
| H | 5.59713  | -3.68280 | 2.24600  |
| O | 1.55933  | 0.74435  | -2.24281 |
| H | 0.74769  | 1.12328  | -1.52578 |
| C | -3.90649 | -0.75082 | 2.96057  |
| C | -5.16448 | -0.56798 | 2.45146  |
| C | -5.34117 | -0.29579 | 1.07242  |
| C | -4.18427 | -0.17272 | 0.23214  |
| C | -2.86507 | -0.27233 | 0.79107  |
| C | -2.76493 | -0.62607 | 2.12953  |
| H | -7.49647 | -0.25343 | 1.17783  |
| H | -3.76706 | -0.99357 | 4.01248  |
| H | -6.03692 | -0.65232 | 3.09285  |

|   |          |          |          |
|---|----------|----------|----------|
| C | -6.63954 | -0.16786 | 0.51464  |
| C | -4.41049 | 0.01692  | -1.16047 |
| C | -5.68338 | 0.12030  | -1.67529 |
| C | -6.81521 | 0.04349  | -0.83248 |
| H | -3.56796 | 0.04626  | -1.83528 |
| H | -5.81777 | 0.25410  | -2.74465 |
| H | -7.81292 | 0.13463  | -1.25066 |
| O | -1.52770 | -0.88920 | 2.66948  |
| H | -1.63645 | -1.08504 | 3.60829  |

64

Name: K Energy: -1056959.2101168

|   |          |          |          |
|---|----------|----------|----------|
| C | -0.25527 | 1.59270  | -0.39005 |
| C | 0.17601  | 2.91583  | 0.14544  |
| C | -1.34215 | -1.21891 | -0.91557 |
| C | -0.47778 | 0.52323  | 0.72639  |
| C | -1.72894 | -0.00523 | -0.06960 |
| C | -1.71212 | 1.36710  | -0.83076 |
| C | -0.90089 | -1.11893 | -2.23784 |
| C | -0.49795 | -2.25386 | -2.94603 |
| C | -0.52727 | -3.50746 | -2.34295 |
| C | -0.95624 | -3.61951 | -1.01710 |
| C | -1.35964 | -2.48782 | -0.31378 |
| O | 1.34274  | 3.20465  | 0.46362  |
| O | -0.80327 | 3.78620  | 0.34349  |
| C | -0.44478 | 5.05308  | 0.93464  |
| H | -0.76758 | 0.99002  | 1.66751  |
| H | -1.89924 | 1.37541  | -1.90427 |

---

|    |          |          |          |
|----|----------|----------|----------|
| H  | -2.39486 | 2.06900  | -0.35155 |
| H  | -0.81003 | -0.15687 | -2.72374 |
| H  | -0.13389 | -2.14075 | -3.96171 |
| H  | -0.20631 | -4.38799 | -2.89100 |
| H  | -0.97659 | -4.59060 | -0.53068 |
| H  | -1.67968 | -2.58288 | 0.71783  |
| H  | -1.37714 | 5.61085  | 1.00222  |
| H  | -0.01146 | 4.89703  | 1.92447  |
| H  | 0.27569  | 5.57380  | 0.30131  |
| Ag | 2.96978  | 1.81859  | -0.07943 |
| H  | 0.33389  | -0.18250 | 0.89629  |
| C  | 4.03751  | 0.30721  | -1.33324 |
| C  | 4.87078  | -0.25517 | -0.34075 |
| C  | 4.44170  | -1.32345 | 0.46094  |
| C  | 3.11711  | -1.85649 | 0.22416  |
| C  | 2.29332  | -1.32681 | -0.77354 |
| C  | 2.69590  | -0.26229 | -1.64821 |
| H  | 6.24734  | -1.47256 | 1.64600  |
| H  | 4.47309  | 0.96569  | -2.08437 |
| H  | 5.87746  | 0.13708  | -0.20890 |
| C  | 5.25411  | -1.88663 | 1.48727  |
| C  | 2.68341  | -2.94277 | 1.05350  |
| H  | 1.32526  | -1.77746 | -0.94970 |
| C  | 3.49442  | -3.45448 | 2.03161  |
| C  | 4.79999  | -2.92558 | 2.25786  |
| H  | 1.69062  | -3.34968 | 0.88184  |
| H  | 3.14418  | -4.27985 | 2.64584  |



---

|   |          |          |          |
|---|----------|----------|----------|
| H | 5.42637  | -3.35084 | 3.03573  |
| O | 1.97507  | 0.22302  | -2.56455 |
| H | 0.46537  | 1.23980  | -1.13855 |
| C | -4.15244 | -0.75875 | 2.83721  |
| C | -5.37995 | -0.57781 | 2.25689  |
| C | -5.48109 | -0.29874 | 0.87112  |
| C | -4.27995 | -0.17314 | 0.09660  |
| C | -2.99717 | -0.27072 | 0.73126  |
| C | -2.96659 | -0.62433 | 2.07207  |
| H | -7.63915 | -0.25463 | 0.85339  |
| H | -4.07219 | -1.00512 | 3.89420  |
| H | -6.28682 | -0.66821 | 2.84761  |
| C | -6.74547 | -0.16725 | 0.24104  |
| C | -4.42421 | 0.01594  | -1.30683 |
| C | -5.66618 | 0.12325  | -1.89195 |
| C | -6.84344 | 0.04906  | -1.11340 |
| H | -3.54425 | 0.02955  | -1.93398 |
| H | -5.74075 | 0.25410  | -2.96741 |
| H | -7.81564 | 0.14256  | -1.58720 |
| O | -1.75533 | -0.86878 | 2.67223  |
| H | -1.90565 | -1.10710 | 3.59535  |

64

Name: J Energy: -1056941.6007955

|   |          |          |          |
|---|----------|----------|----------|
| C | 0.22146  | 1.64722  | 0.37039  |
| C | -0.29401 | 2.90031  | 0.05380  |
| C | 1.33011  | -1.20409 | 0.95408  |
| C | 0.31732  | 0.50828  | -0.64870 |

---

|    |          |          |          |
|----|----------|----------|----------|
| C  | 1.63385  | 0.01509  | 0.08325  |
| C  | 1.64888  | 1.39613  | 0.83953  |
| C  | 1.13600  | -1.13787 | 2.33769  |
| C  | 0.82452  | -2.28161 | 3.07893  |
| C  | 0.69824  | -3.51761 | 2.44928  |
| C  | 0.88484  | -3.59804 | 1.06595  |
| C  | 1.19485  | -2.45636 | 0.33062  |
| O  | -1.27505 | 3.15325  | -0.75013 |
| O  | 0.29297  | 3.96010  | 0.66436  |
| C  | -0.34569 | 5.22935  | 0.51666  |
| H  | 0.51518  | 0.86869  | -1.66140 |
| H  | 1.84530  | 1.37844  | 1.91471  |
| H  | 2.38141  | 2.07821  | 0.39280  |
| H  | 1.19696  | -0.18778 | 2.85255  |
| H  | 0.67159  | -2.19654 | 4.15062  |
| H  | 0.45617  | -4.40621 | 3.02442  |
| H  | 0.79319  | -4.55506 | 0.55909  |
| H  | 1.31900  | -2.52717 | -0.74413 |
| H  | 0.25745  | 5.92822  | 1.09803  |
| H  | -0.37679 | 5.54022  | -0.53071 |
| H  | -1.36818 | 5.20465  | 0.90682  |
| Ag | -2.79944 | 1.67614  | -0.64492 |
| H  | -0.46790 | -0.25103 | -0.70710 |
| C  | -3.73440 | 0.60718  | 1.18946  |
| C  | -4.56464 | -0.04306 | 0.26995  |
| C  | -4.22083 | -1.33314 | -0.23285 |
| C  | -3.01931 | -1.94848 | 0.24890  |

---

|   |          |          |          |
|---|----------|----------|----------|
| C | -2.17798 | -1.25407 | 1.15859  |
| C | -2.48254 | 0.02044  | 1.59516  |
| H | -5.94923 | -1.55367 | -1.51422 |
| H | -4.05590 | 1.51707  | 1.69096  |
| H | -5.52760 | 0.38908  | 0.00932  |
| C | -5.03599 | -2.02628 | -1.16223 |
| C | -2.67686 | -3.23870 | -0.23525 |
| H | -1.25299 | -1.71172 | 1.48159  |
| C | -3.48673 | -3.88588 | -1.14176 |
| C | -4.67751 | -3.27888 | -1.60895 |
| H | -1.75867 | -3.69418 | 0.12111  |
| H | -3.21296 | -4.87231 | -1.50390 |
| H | -5.30719 | -3.80468 | -2.31976 |
| O | -1.63488 | 0.77172  | 2.33382  |
| H | -0.88692 | 1.10632  | 1.70284  |
| C | 3.87919  | -0.82549 | -2.94826 |
| C | 5.13943  | -0.59477 | -2.46502 |
| C | 5.32695  | -0.25112 | -1.10350 |
| C | 4.17766  | -0.10531 | -0.25644 |
| C | 2.85370  | -0.25550 | -0.79295 |
| C | 2.74521  | -0.67964 | -2.11027 |
| H | 7.47984  | -0.17858 | -1.23741 |
| H | 3.73199  | -1.12387 | -3.98471 |
| H | 6.00579  | -0.69564 | -3.11226 |
| C | 6.62927  | -0.07422 | -0.56874 |
| C | 4.41673  | 0.15830  | 1.12190  |
| C | 5.69343  | 0.30787  | 1.61546  |

|   |         |          |          |
|---|---------|----------|----------|
| C | 6.81679 | 0.20688  | 0.76392  |
| H | 3.58135 | 0.21059  | 1.80414  |
| H | 5.83759 | 0.49836  | 2.67492  |
| H | 7.81753 | 0.33517  | 1.16478  |
| O | 1.50793 | -0.99696 | -2.62051 |
| H | 1.60825 | -1.22169 | -3.55378 |

## 12 References

- [1] (a) K. Dhake, K. J. Woelk, J. Becica, A. Un, S. E. Jenny and D. C. Leitch, *Angew. Chem. Int. Ed.* 2022, DOI: 10.1002/anie.202204719; (b) K. Livingstone, K. Siebold, S. Meyer, V. M. Heras, C. G. Daniliuc and R. Gilmour, *ACS Catalysis*. 2022, **12**, 14507; (c) R. Y. Guo, Y-C. Chang, L. Herter, C. Salome, S. E. Braley, T. C. Fessard and M. K. Brown, *J. Am. Chem. Soc.*, 2022, **144**, 7988.
- [2] (a) L.-L. Wang, H. Zhou, T.-L. Yang, H. Ke, Y.-K. Tu, H. Yao and W. Jiang, *Chem. Eur. J.*, 2018, **24**, 16757; (b) Y.-H. Chen, D.-J. Cheng, J. Zhang, Y. Wang, X.-Y. Liu and B. Tan, *J. Am. Chem. Soc.*, 2015, **137**, 15062; (c) Y.-H. Chen, H.-H. Li, X. Zhang, S.-H. Xiang, S. Li and B. Tan, *Angew. Chem. Int. Ed.*, 2020, **59**, 11374; (d) J. Wang, X. T. Qi, X.-L. Min, W. B. Yi, P. Liu and Y. He, *J. Am. Chem. Soc.*, 2021, **143**, 10686.
- [3] Y. Xiao, L. Tang, T.-T. Xu and J.-J. Feng, *Org. Lett.*, 2022, **24**, 2619.
- [4] J. E. M. Fernando, Y. J. Nakano, C. H. Zhang and D. W. Lupton, *Angew. Chem. Int. Ed.*, 2019, **58**, 4007.
- [5] D.-X. Zhu, H. Xia, J.-G. Liu, L. W. Chung and M.-H. Xu, *J. Am. Chem. Soc.*, 2021, **143**, 2608.
- [6] A. Bagno, E. Menna, G. Scorrano and S. Zerbinati, *Reson. Chem.* 2001, **39**, 59.
- [7] M. J. Frisch, G. W. Trucks, H. B. Schlegel, G. E. Scuseria, M. A. Robb, J. R. Cheeseman, G. Scalmani, V. Barone, G. A. Petersson, H. Nakatsuji, X. Li, M. Caricato, A. V. Marenich, J. Bloino, B. G. Janesko, R. Gomperts, B. Mennucci,

- H. P. Hratchian, J. V. Ortiz, A. F. Izmaylov, J. L. Sonnenberg, D. Williams-Young, F. Ding, F. Lipparini, F. Egidi, J. Goings, B. Peng, A. Petrone, T. Henderson, D. Ranasinghe, V. G. Zakrzewski, J. Gao, N. Rega, G. Zheng, W. Liang, M. Hada, M. Ehara, K. Toyota, R. Fukuda, J. Hasegawa, M. Ishida, T. Nakajima, Y. Honda, O. Kitao, H. Nakai, T. Vreven, K. Throssell, J. A. Montgomery, Jr., J. E. Peralta, F. Ogliaro, M. J. Bearpark, J. J. Heyd, E. N. Brothers, K. N. Kudin, V. N. Staroverov, T. A. Keith, R. Kobayashi, J. Normand, K. Raghavachari, A. P. Rendell, J. C. Burant, S. S. Iyengar, J. Tomasi, M. Cossi, J. M. Millam, M. Klene, C. Adamo, R. Cammi, J. W. Ochterski, R. L. Martin, K. Morokuma, O. Farkas, J. B. Foresman, and D. J. Fox, Gaussian, Inc., Wallingford CT, **2016**.
- [8] (a) A. D. Becke, *J. Chem. Phys.*, 1993, **98**, 5648; (b) C. Lee, W. Yang and R. G. Parr, *Phys. Rev. B: Condens. Matter Mater. Phys.* 1988, **37**, 78; (c) S. Grimme, J. Antony, S. Ehrlich and H. Krieg, *J. Chem. Phys.*, 2010, **132**, 154104.
- [9] (a) D. Andrae, U. Haussermann, M. Dolg, H. Stoll and H. Preuss, *Theor. Chim. Acta.*, 1990, **77**, 123; (b) M. Dolg, U. Wedig, H. Stoll and H. Preuss, *J. Chem. Phys.*, 1987, **86**, 866.
- [10] M. M. Francl, W. J. Pietro, W. J. Hehre, J. S. Binkley, M. S. Gordon, D. J. DeFrees and J. A. Pople, *J. Chem. Phys.*, 1982, **77**, 3654.
- [11] A. V. Marenich, C. J. Cramer and D. G. Truhlar, *J. Phys. Chem. B*, 2009, **113**, 6378.
- [12] Weigend, F.; Ahlrichs, R. Balanced Basis Sets of Split Valence, Triple Zeta Valence and Quadruple Zeta Valence Quality for H to Rn: Design and Assessment of Accuracy. *Phys. Chem. Chem. Phys.* 2005, **7**, 329.
- [13] Luchini, G.; Alegre-Requena, J. V.; Funes-Ardoiz, I.; Paton, R. S. GoodVibes: Automated Thermochemistry for Heterogeneous Computational Chemistry Data. *F1000Res.* 2020, **9**, 291.
- [14] Grimme, S. Supramolecular Binding Thermodynamics by Dispersion-Corrected Density Functional Theory. *Chem. -Eur. J.* 2012, **18**, 9955.
- [15] Li, Y.-P.; Gomes, J.; Sharada, S. M.; Bell, A. T.; Head-Gordon, M. Improved Force-Field Parameters for QM/MM Simulations of the Energies of Adsorption

- for Molecules in Zeolites and a Free Rotor Correction to the Rigid Rotor Harmonic Oscillator Model for Adsorption Enthalpies. *J. Phys. Chem. C* 2015, **119**, 1840.
- [16] Legault, C. Y. CYLview, 1.0b; Université de Sherbrooke: Quebec, Montreal, Canada, **2009**.
- [17] Delano, W. L. The PyMOL Molecular Graphics System; Delano Scientific, **2002**.
